# Supplementary material for: A Convenient Way to Quinoxaline Derivatives through the Reaction of 2-(3-Oxoindolin-2-yl)-2-phenylacetonitriles with Benzene-1,2-diamines
Source: MDPI journal article supplement (doi:10.3390/ijms231911120), 2022-09-22
Supplement: s1 [file s1]

## Formation of quinoxalines in reaction of 2-(3-oxoindolin-2-yl)-2-phenylacetonitriles with ben-zene-1,2-diamines

Alexander V. Aksenov<sup>1,\*</sup>, Nikolai A. Arutiunov<sup>1</sup>, Dmitrii A. Aksenov<sup>1</sup>, Artem V. Samovolov<sup>1</sup>, Igor A. Kurenkov<sup>1</sup>, Nicolai A. Aksenov<sup>1</sup>, Elena A. Aleksandrova<sup>1</sup>, Daria S. Momotova, and Michael Rubin<sup>1,2,\*</sup>

<sup>1</sup> Department of Chemistry, North Caucasus Federal University, 1a Pushkin St., 355017 Stavropol, Russia; [naarutiunov@ncfu.ru](mailto:naarutiunov@ncfu.ru)

<sup>2</sup> Department of Chemistry, University of Kansas, 1567 Irving Hill Road, Lawrence, KS 66045, USA

\* Correspondence: [aaksenov@ncfu.ru](mailto:aaksenov@ncfu.ru) (A.V.A.); [mrubin@ku.edu](mailto:mrubin@ku.edu) (M.R.)

## Supporting Information

|                                                                                                      |     |
|------------------------------------------------------------------------------------------------------|-----|
| NMR Spectral Charts.....                                                                             | S2  |
| <sup>1</sup> H and <sup>13</sup> C NMR spectral charts for 2-phenyl-3 <i>H</i> -indol-3-one (2)..... | S2  |
| <sup>1</sup> H and <sup>13</sup> C NMR spectral charts for quinoxalines (4).....                     | S3  |
| HRMS spectral charts .....                                                                           | S27 |
| HRMS spectral charts for quinoxalines (4).....                                                       | S27 |
| X-Ray crystallography data.....                                                                      | S33 |
| X-Ray crystallography data for 4aa.....                                                              | S33 |
| X-Ray crystallography data for 4'ba.....                                                             | S41 |
| References.....                                                                                      | S49 |

<sup>1</sup>H and <sup>13</sup>C NMR spectral charts for 2-phenyl-3*H*-indol-3-one (2)

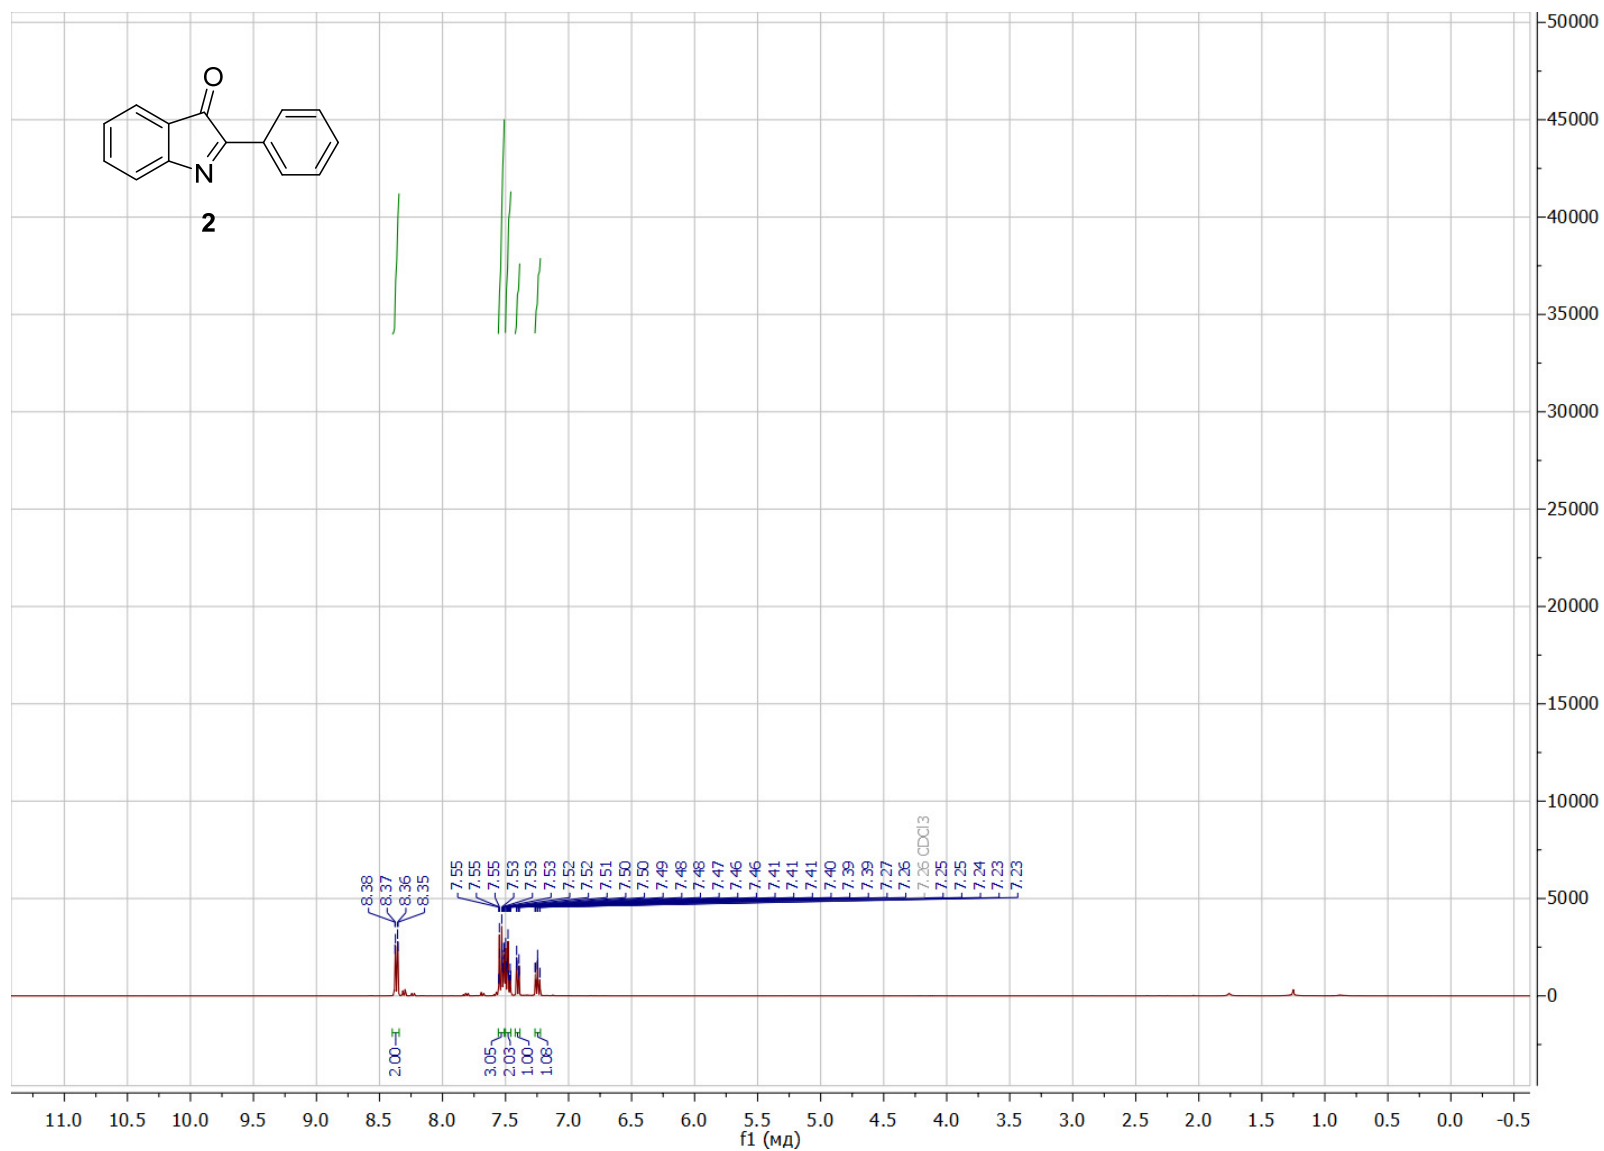

Figure S1. <sup>1</sup>H NMR spectrum of **2** in CDCl<sub>3</sub> (400 MHz)

<sup>1</sup>H and <sup>13</sup>C NMR spectral charts for quinoxalines (4)

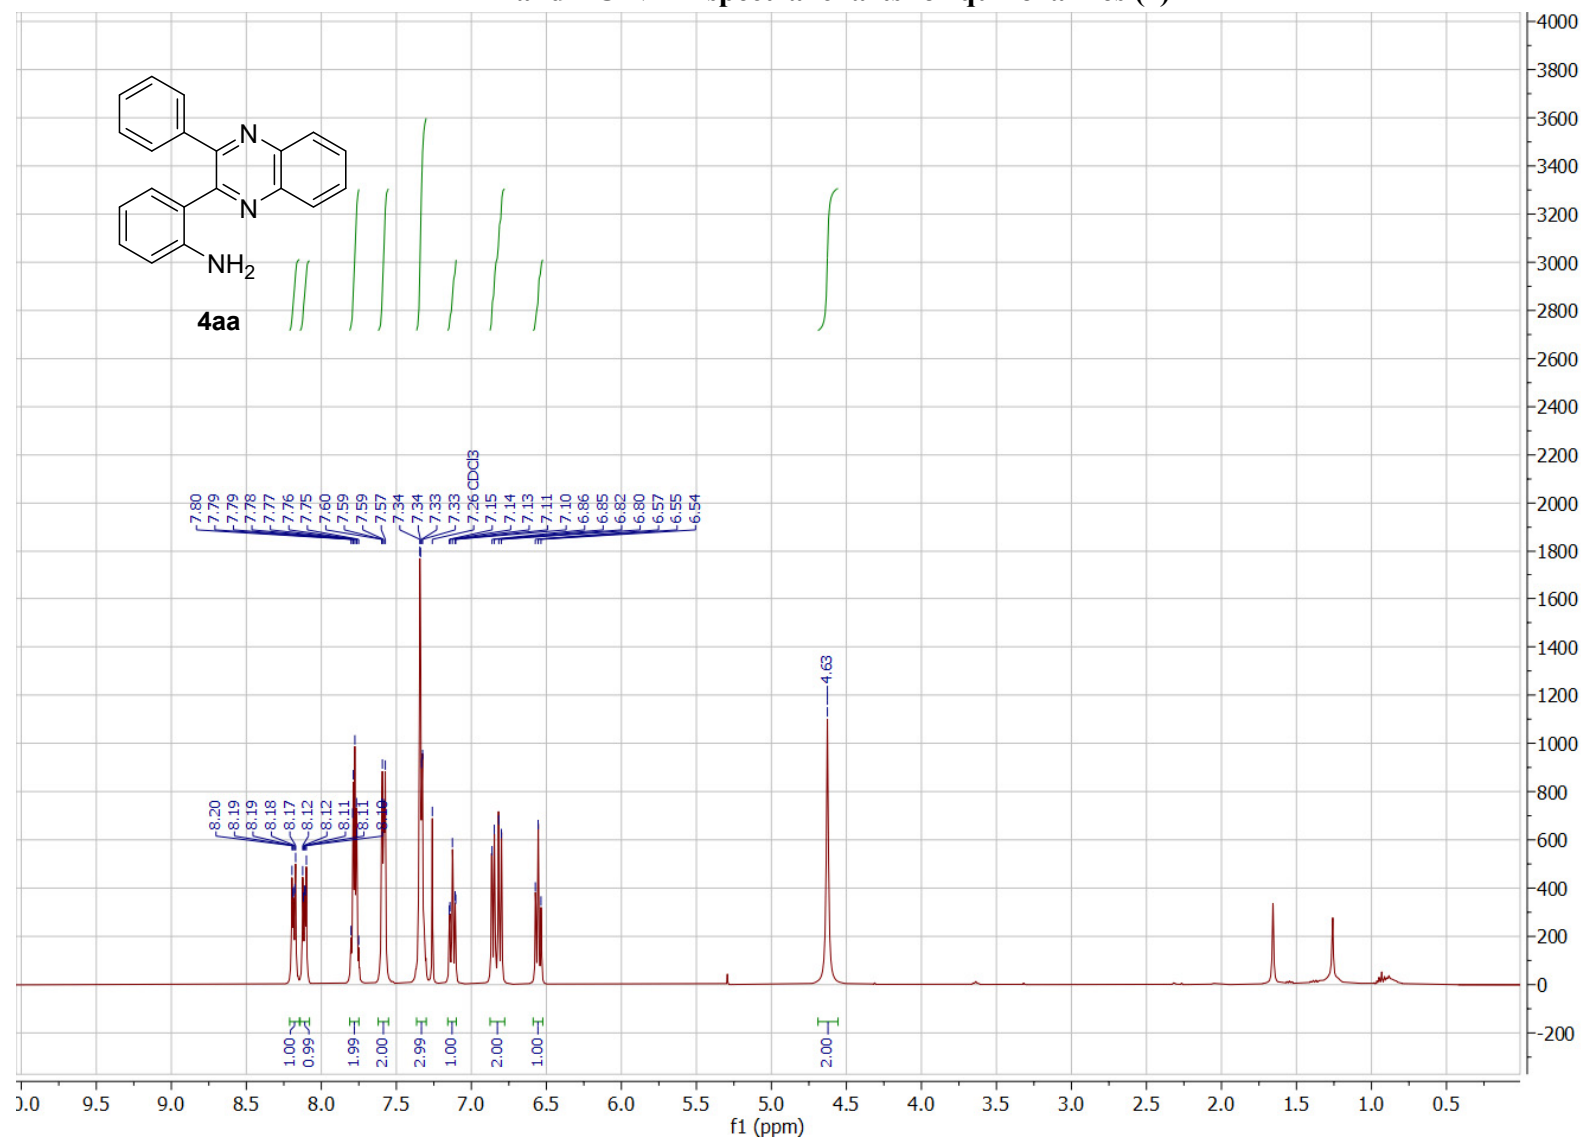

Figure S2. <sup>1</sup>H NMR spectrum of **4aa** in CDCl<sub>3</sub> (400 MHz)

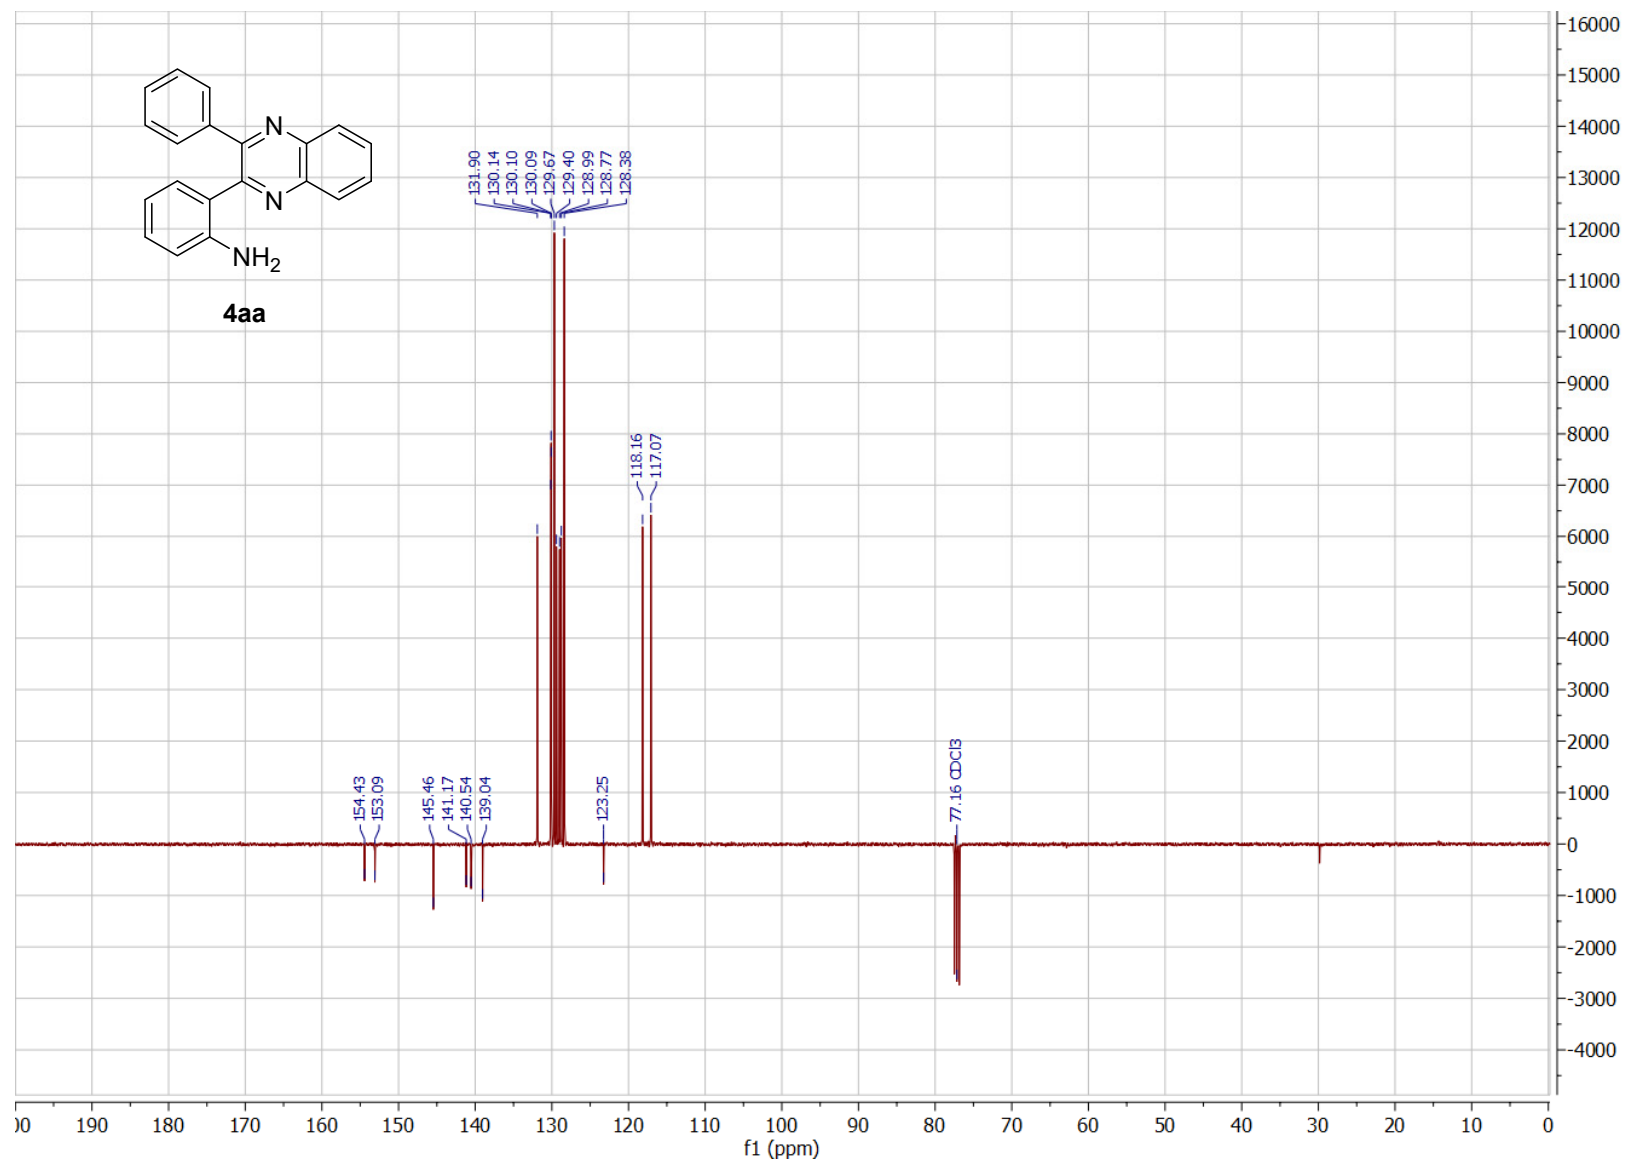

Figure S3. <sup>13</sup>C DEPTQ NMR spectrum of **4aa** in CDCl<sub>3</sub> (101 MHz)

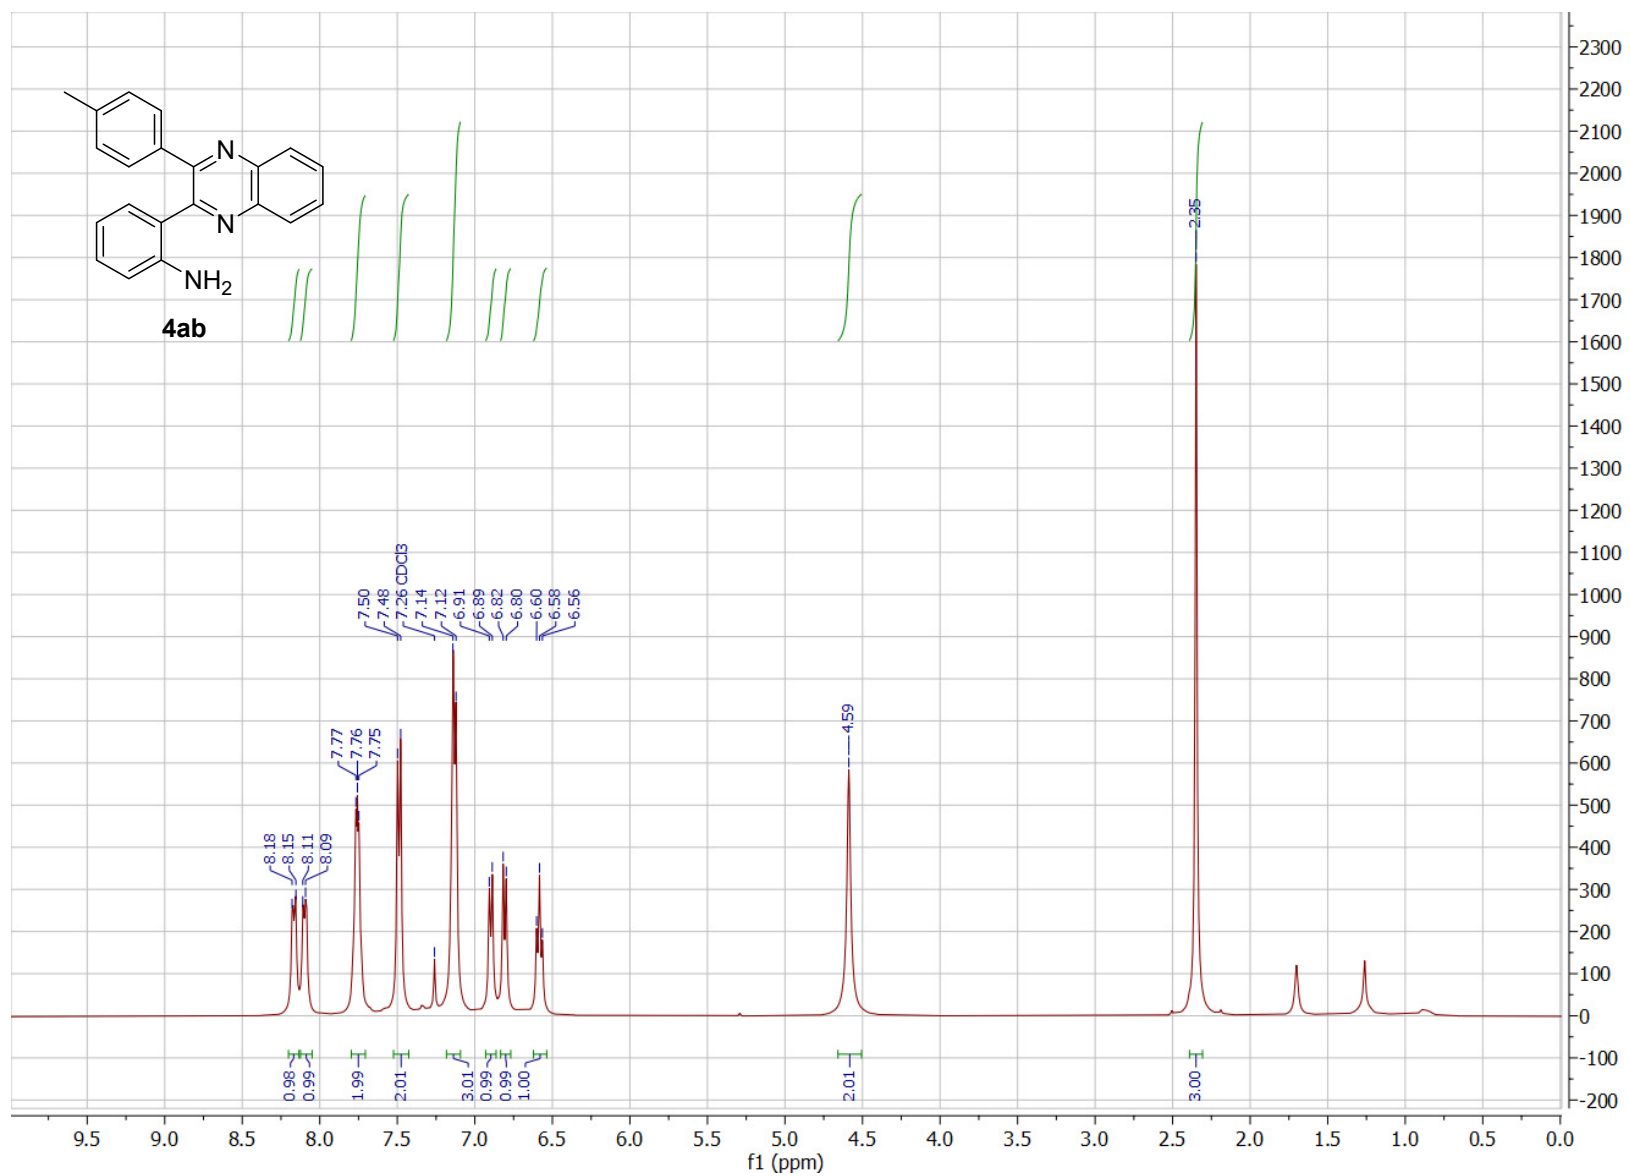

Figure S4. <sup>1</sup>H NMR spectrum of **4ab** in CDCl<sub>3</sub> (400 MHz)

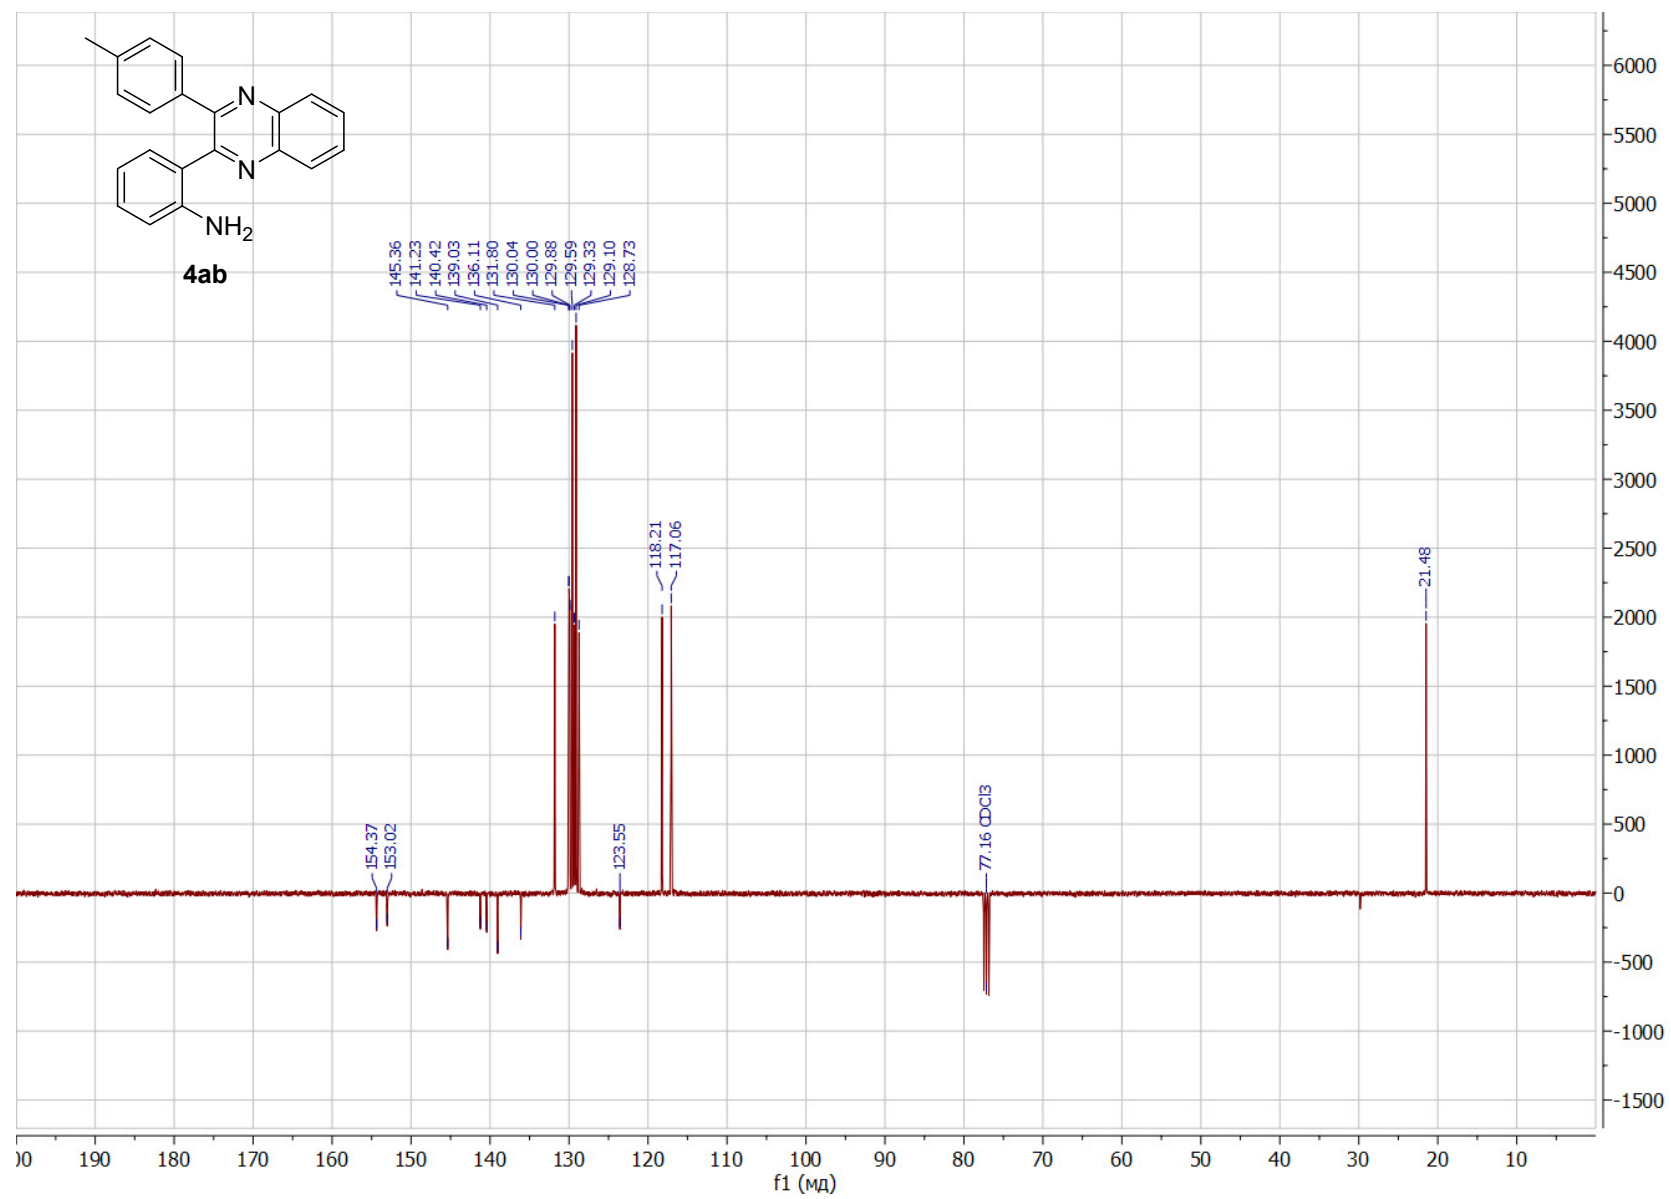

Figure S5.  $^{13}\text{C}$  DEPTQ NMR spectrum of **4ab** in  $\text{CDCl}_3$  (101 MHz)

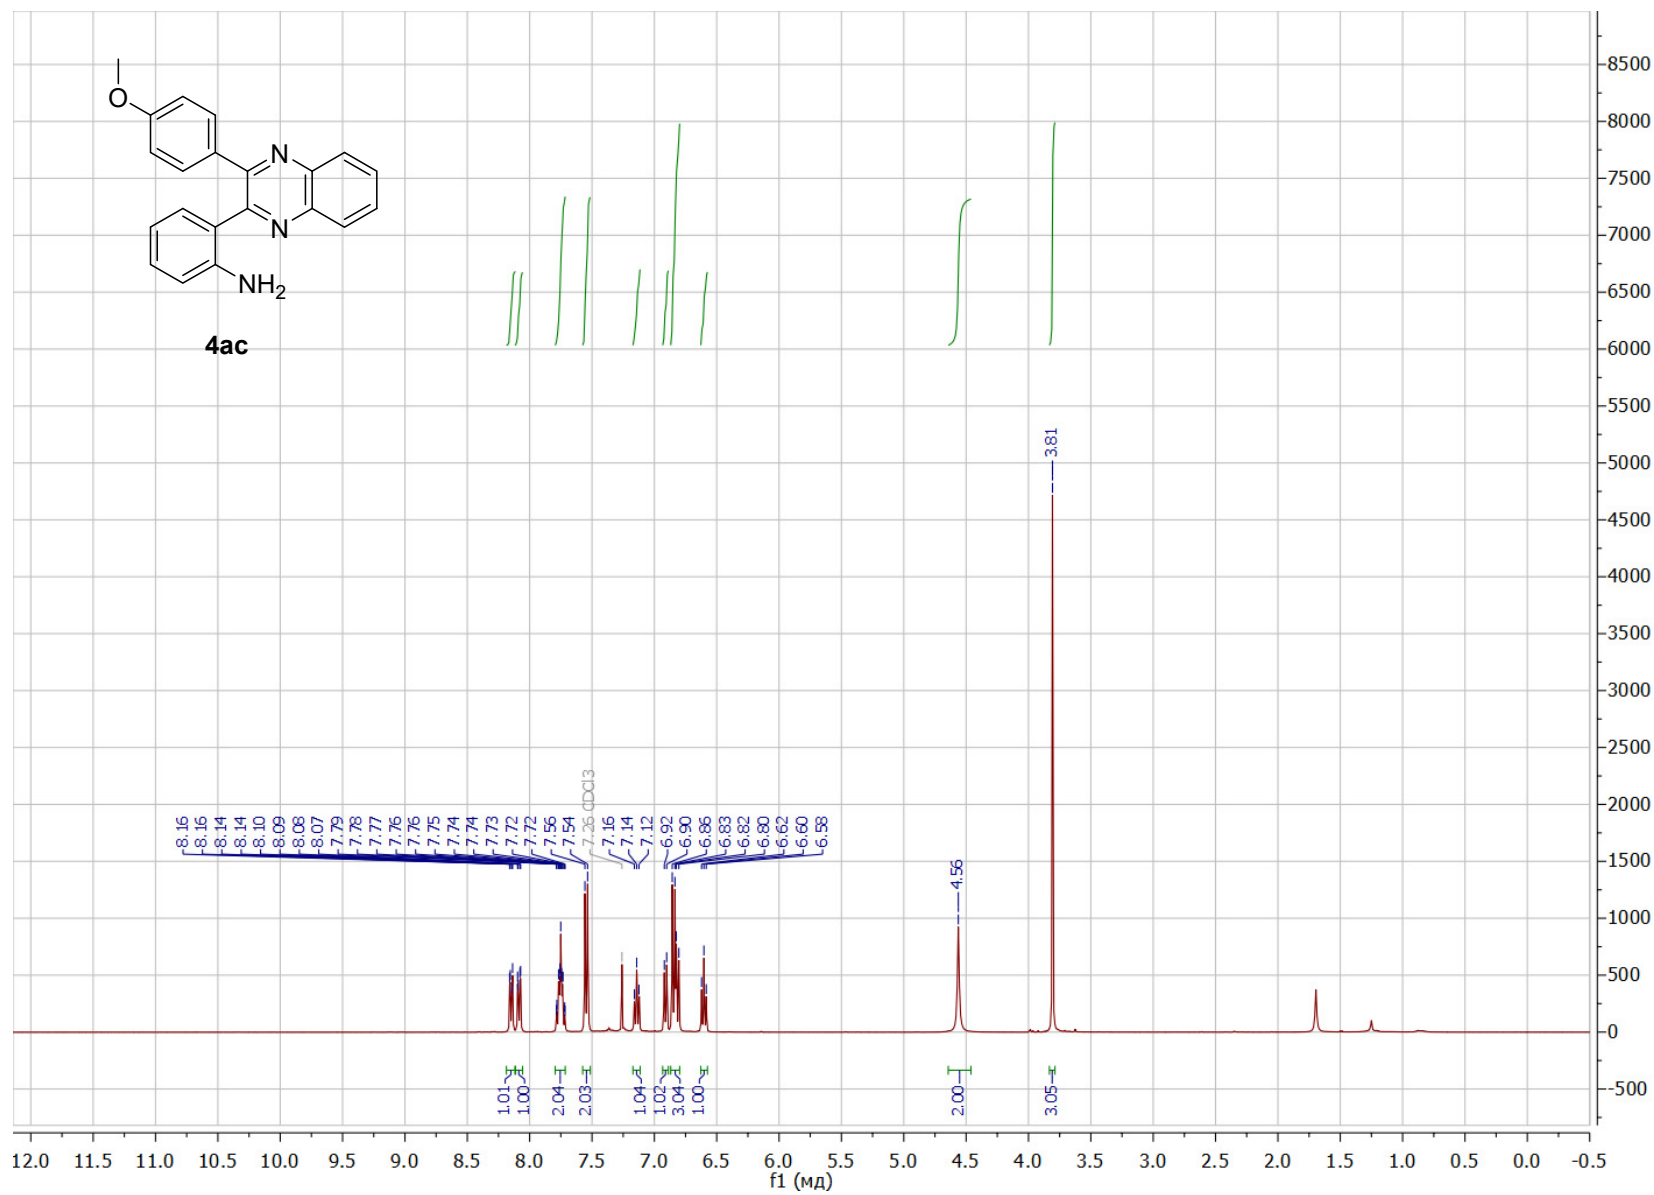

Figure S6.  $^1\text{H}$  NMR spectrum of **4ac** in  $\text{CDCl}_3$  (400 MHz)

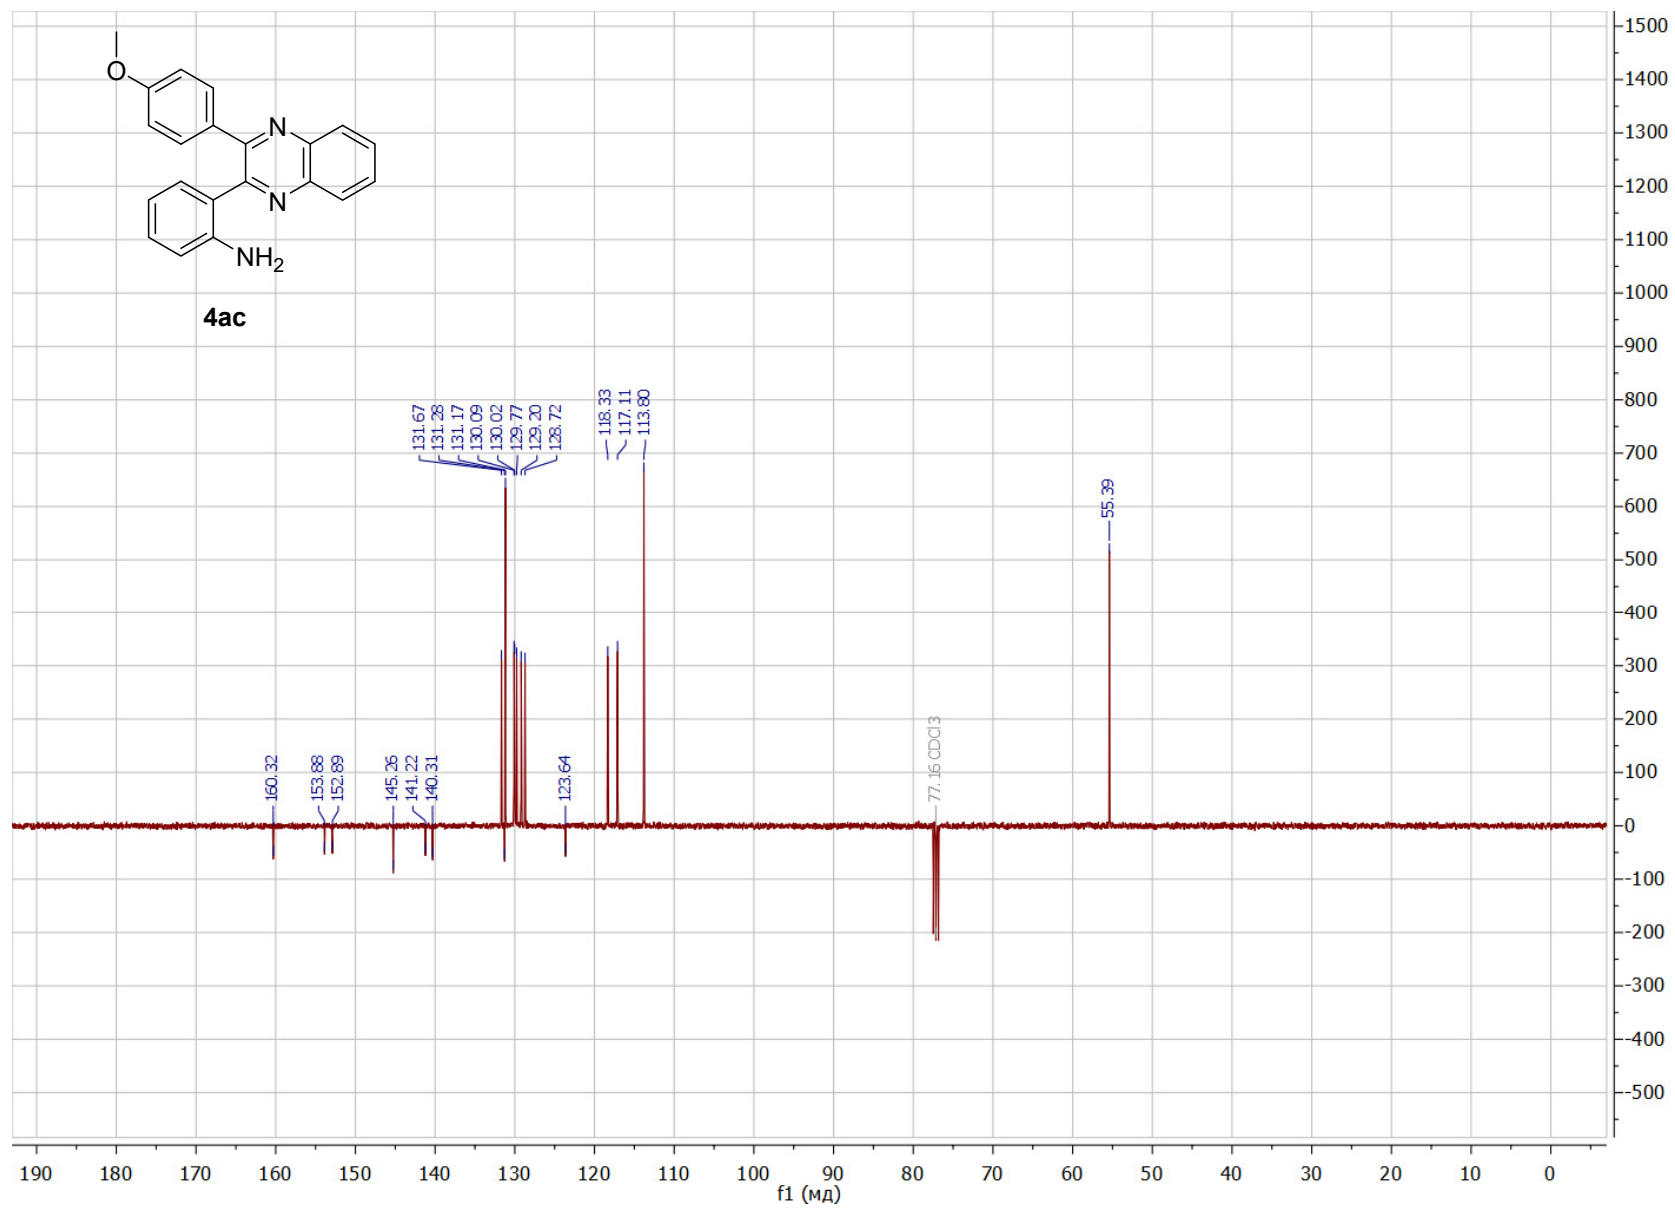

Figure S7.  $^{13}\text{C}$  DEPTQ NMR spectrum of **4ac** in  $\text{CDCl}_3$  (101 MHz)



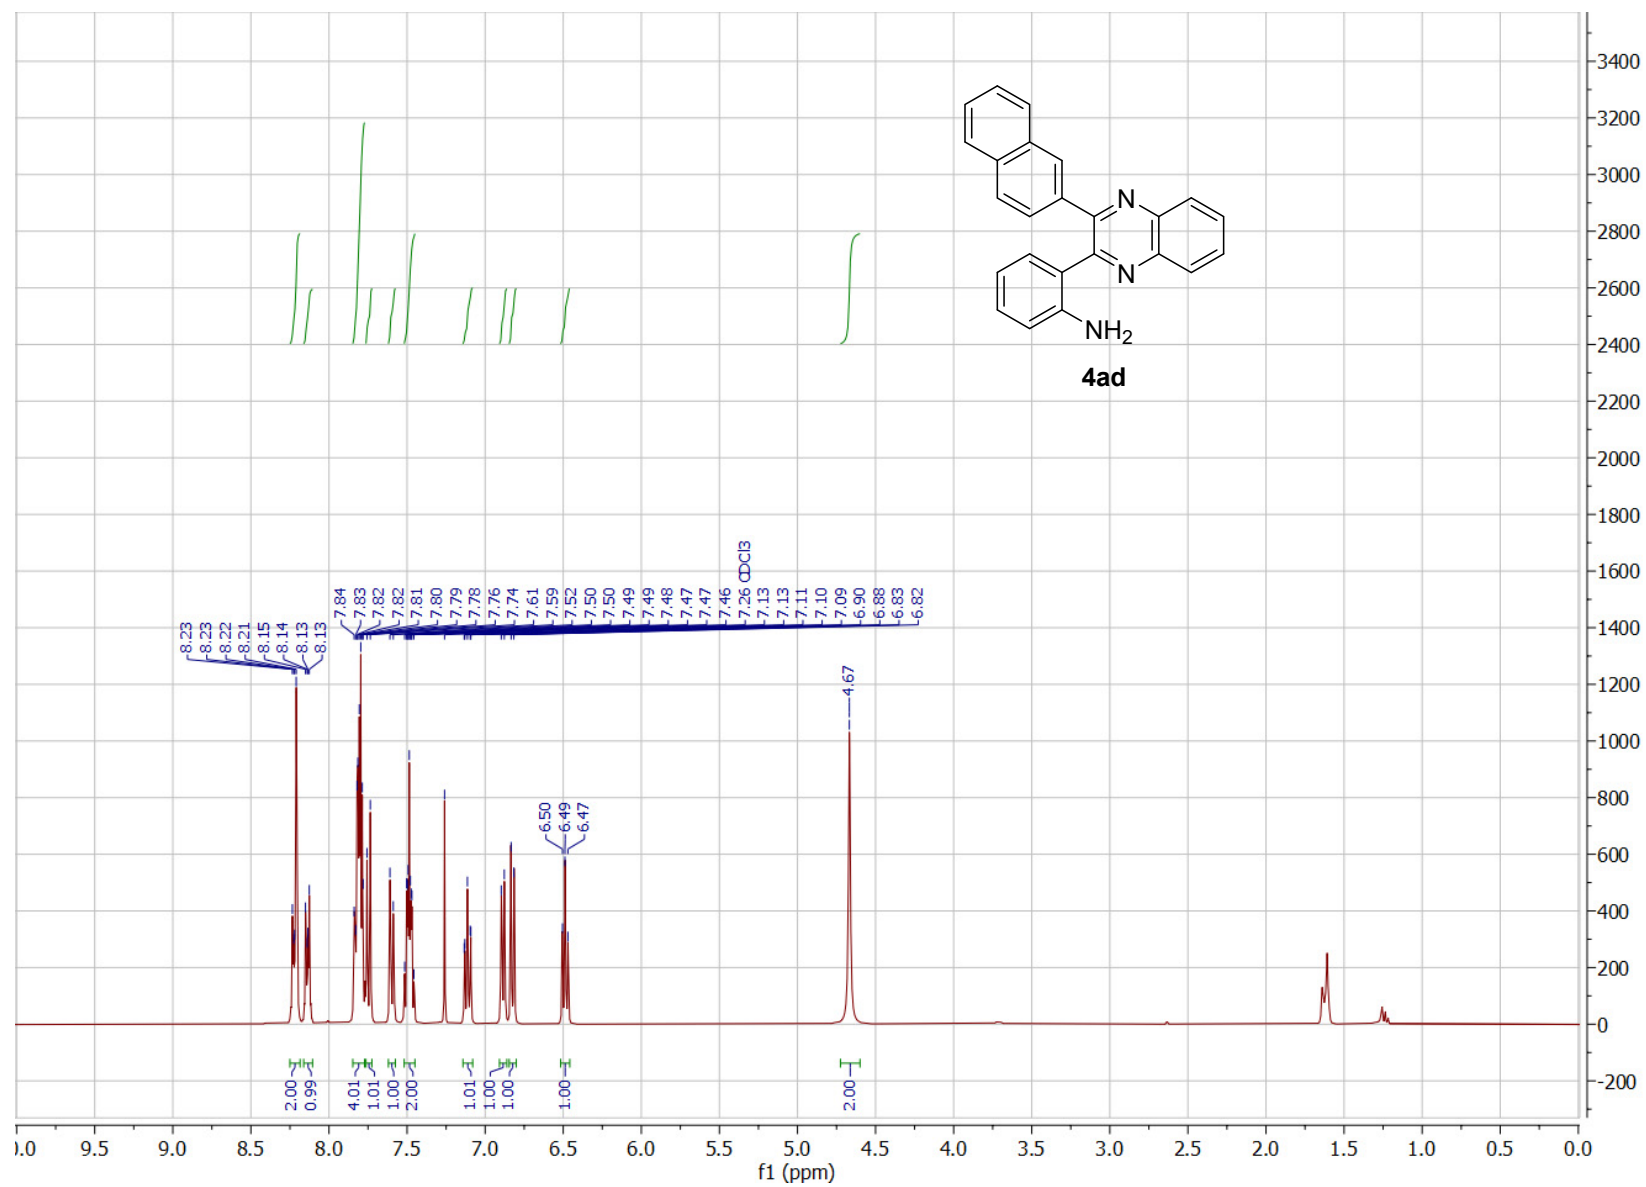

Figure S8. <sup>1</sup>H NMR spectrum of **4ad** in CDCl<sub>3</sub> (400 MHz)

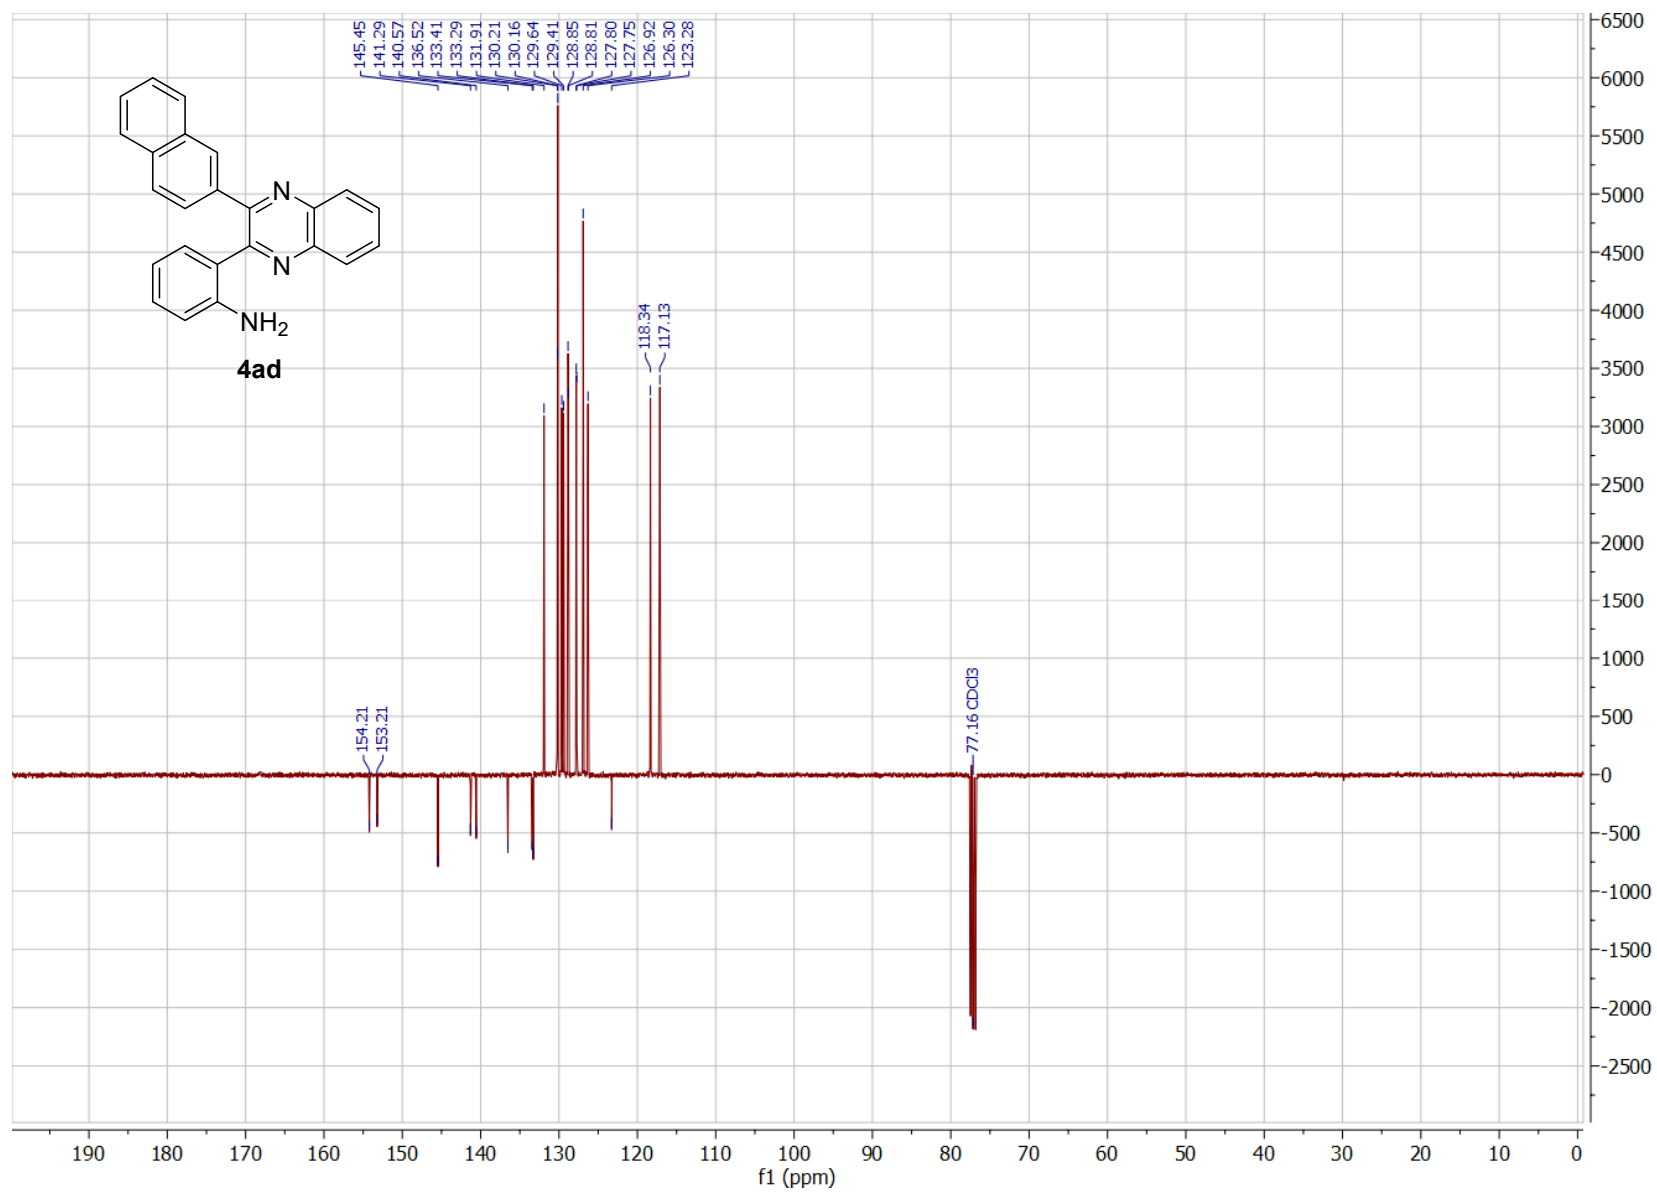

Figure S9.  $^{13}\text{C}$  DEPTQ NMR spectrum of **4ad** in  $\text{CDCl}_3$  (101 MHz)

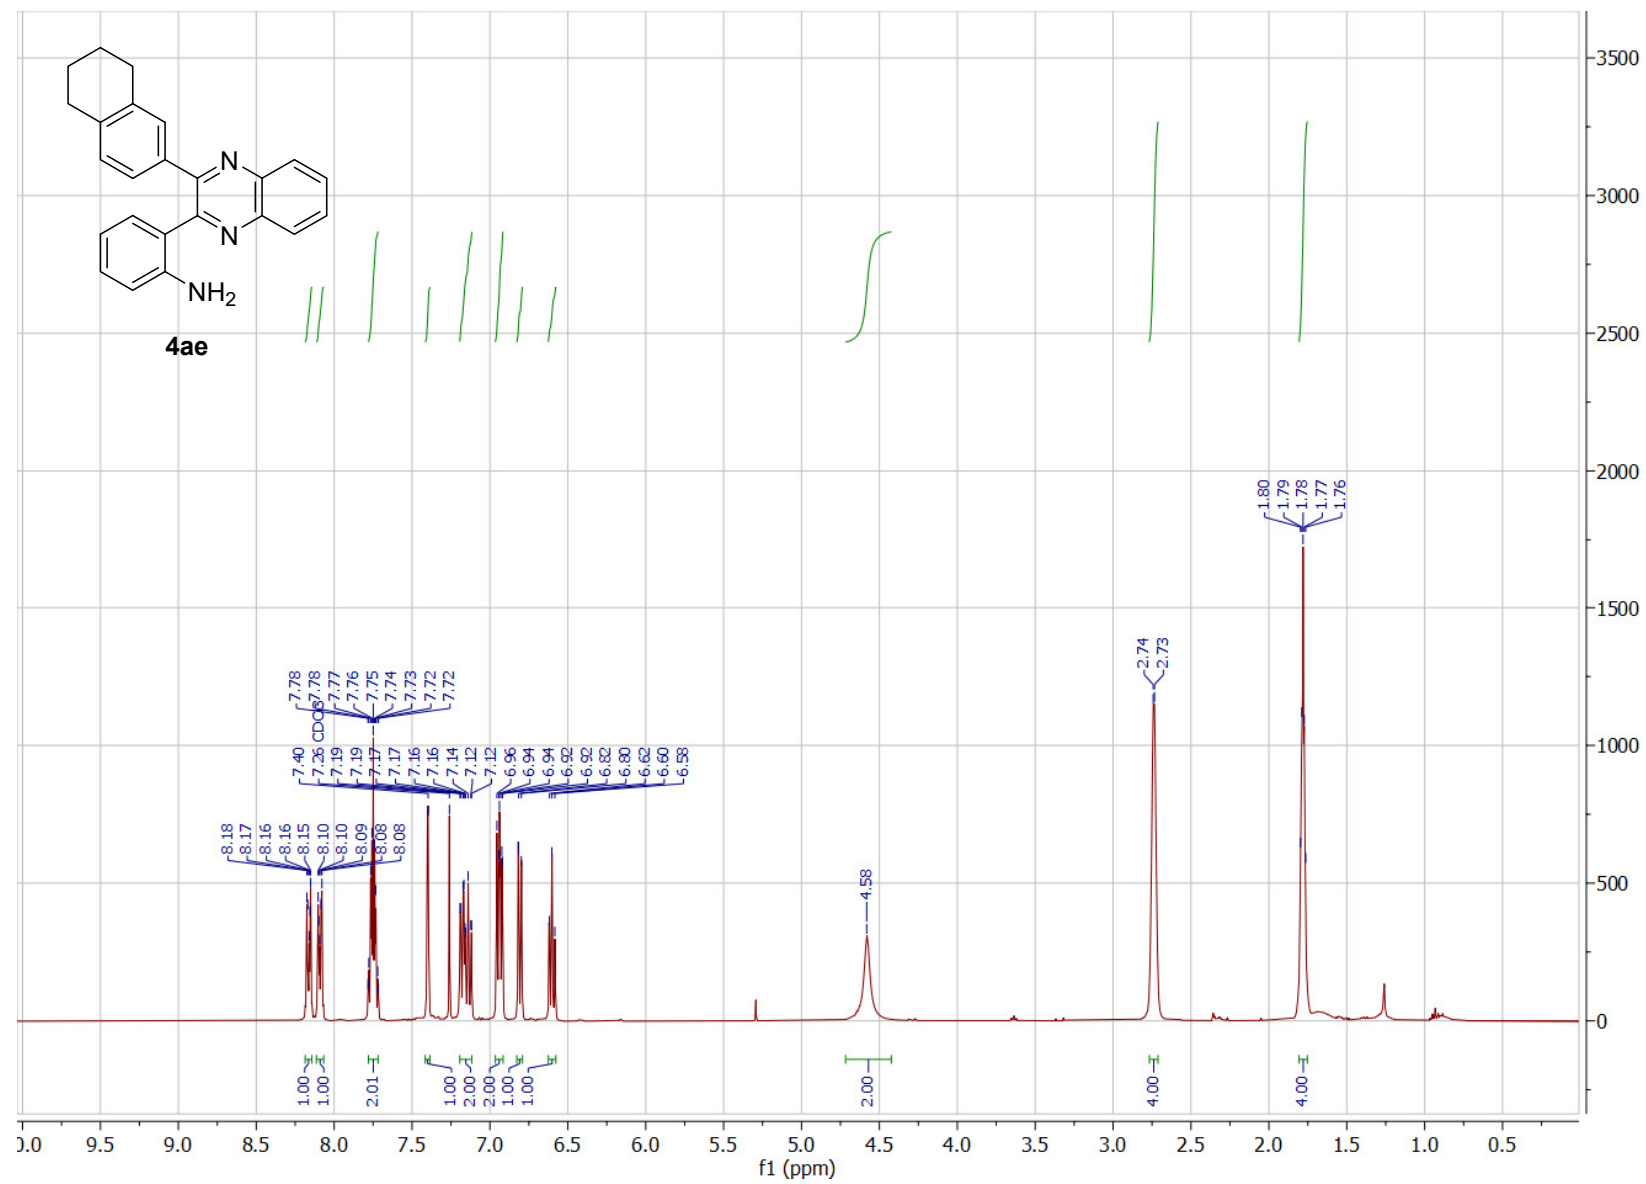

Figure S10. <sup>1</sup>H NMR spectrum of **4ae** in CDCl<sub>3</sub> (400 MHz)

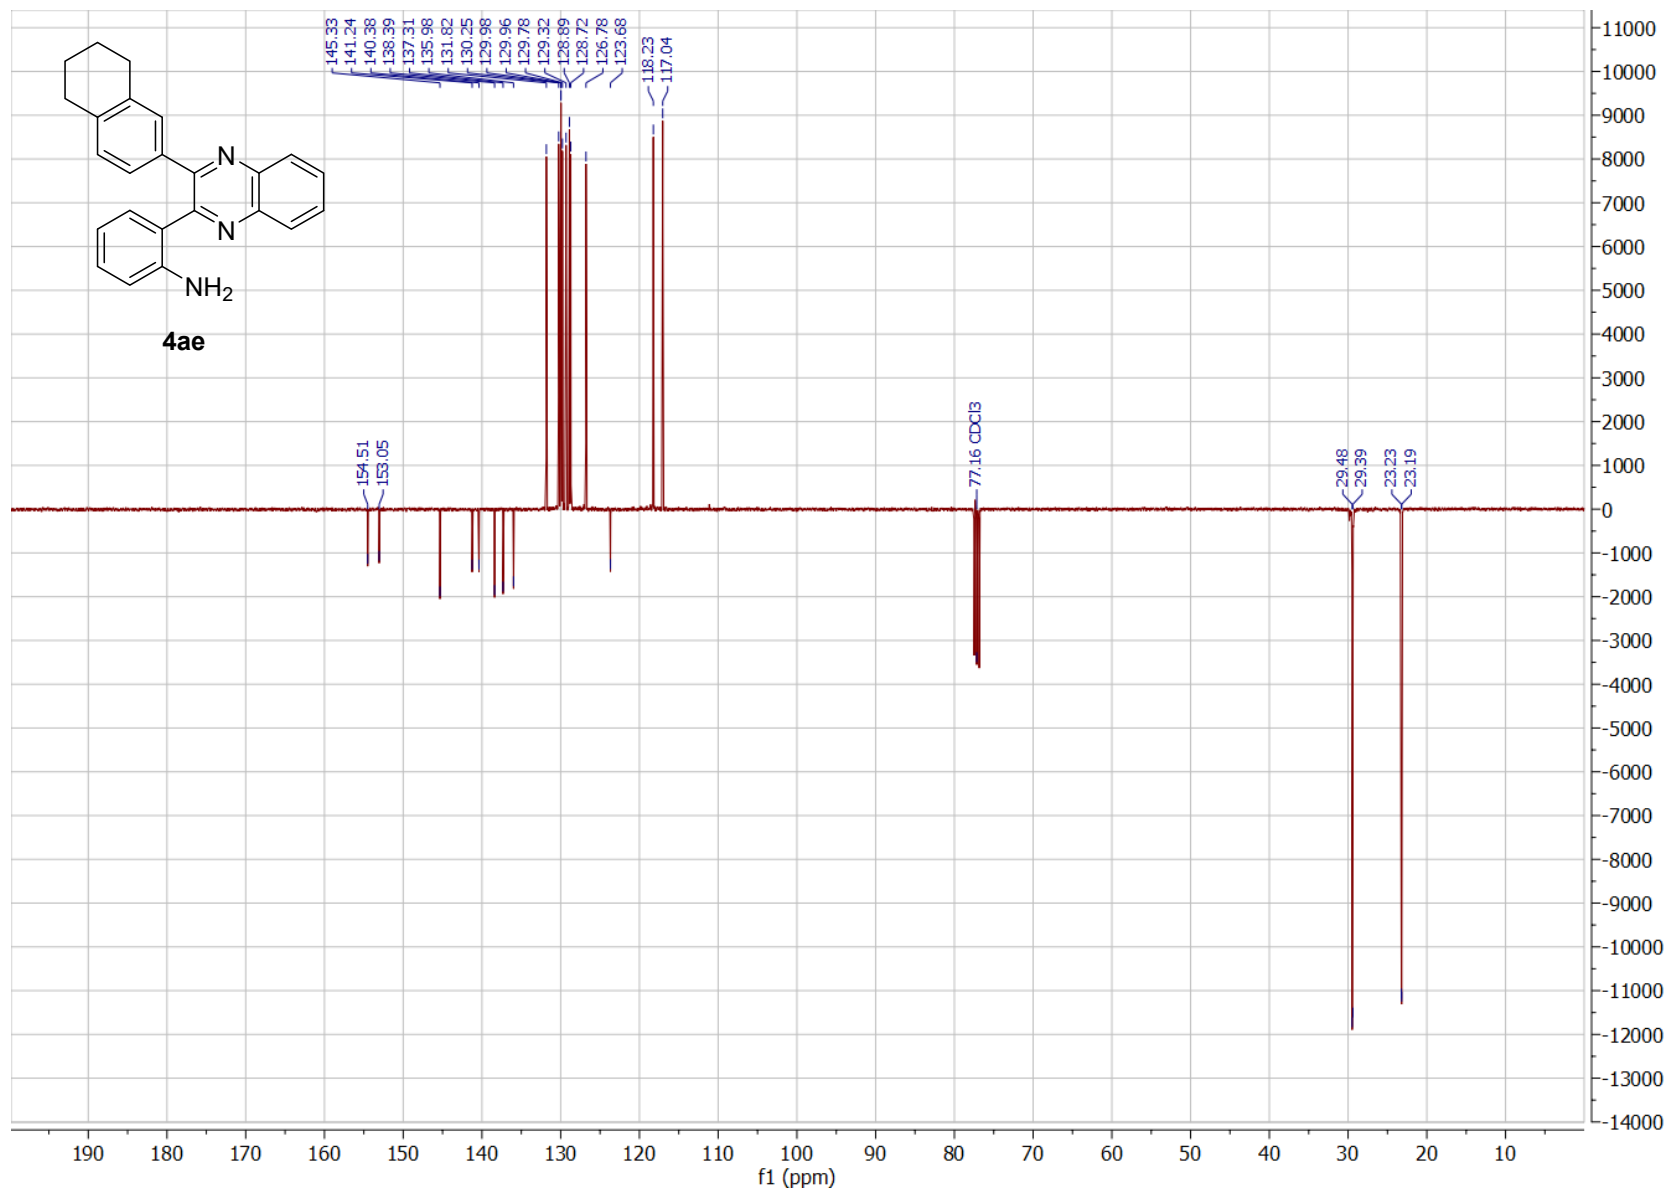

Figure S11.  $^{13}\text{C}$  DEPTQ NMR spectrum of **4ae** in  $\text{CDCl}_3$  (101 MHz)

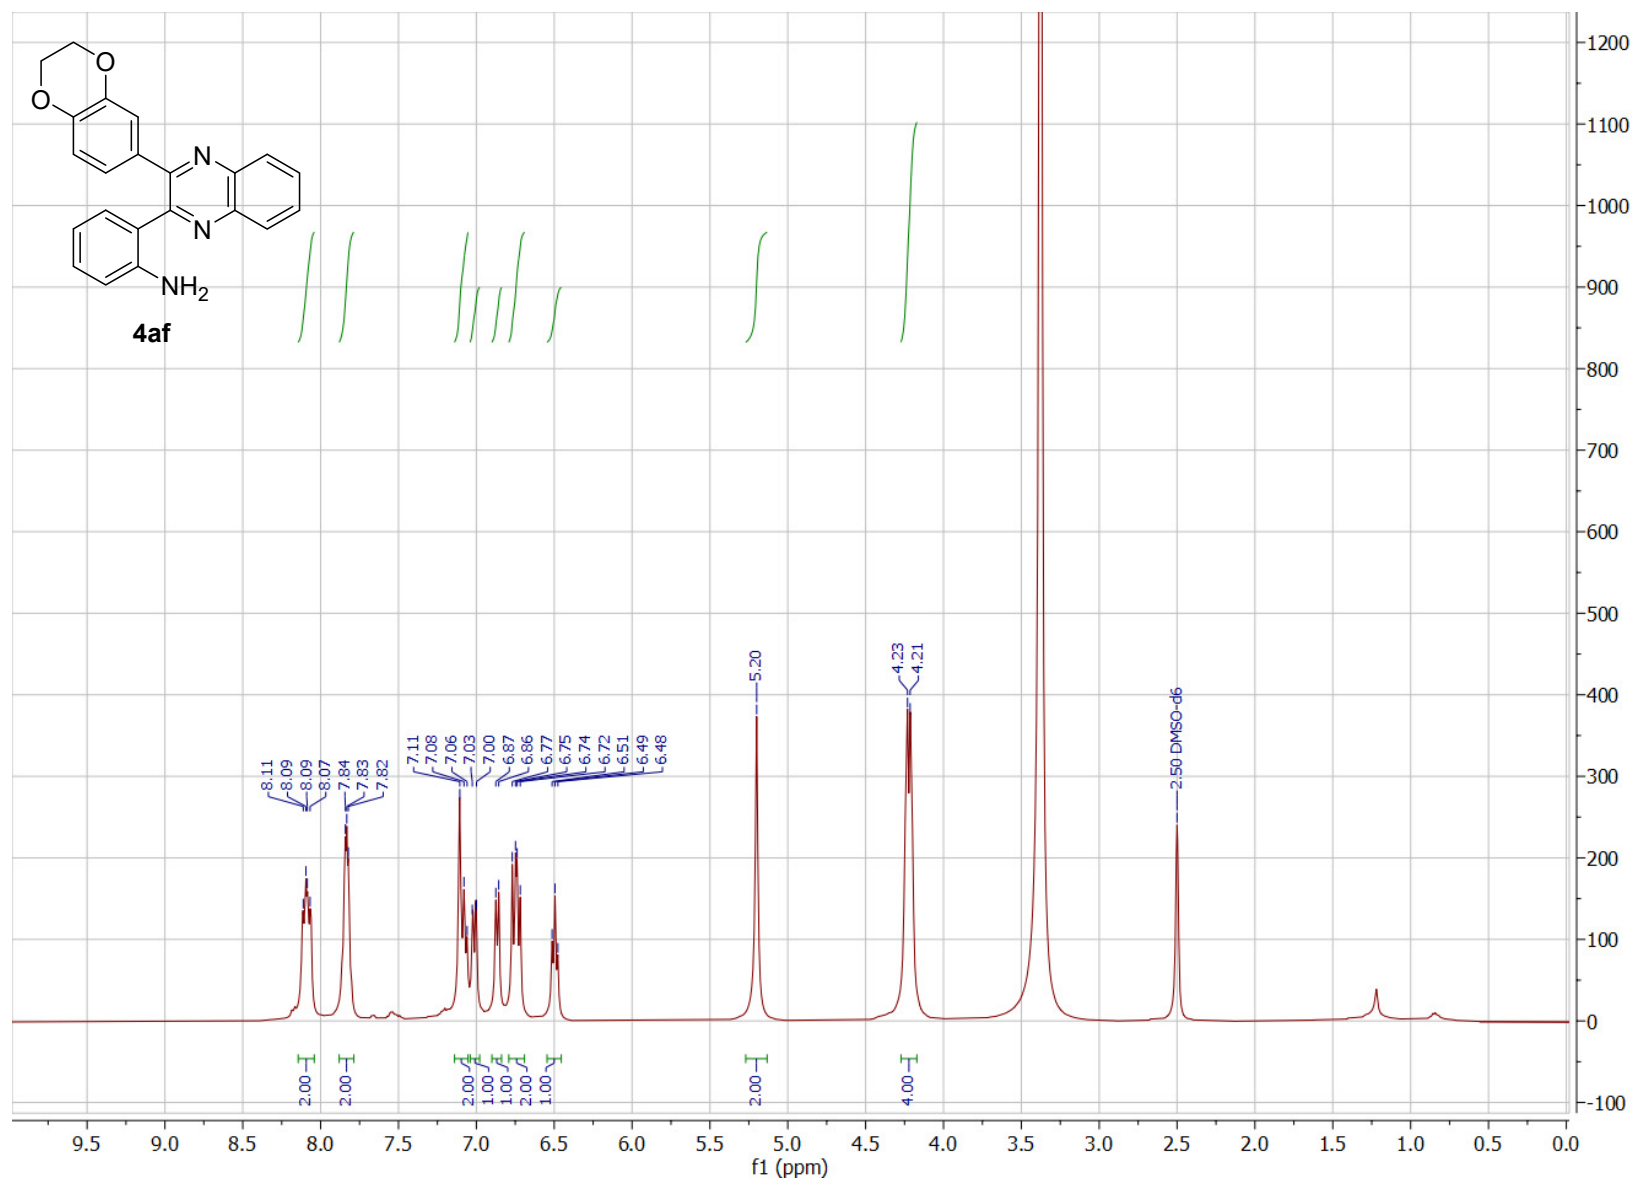

Figure S12.  $^1\text{H}$  NMR spectrum of **4af** in  $\text{DMSO}-d_6$  (400 MHz)

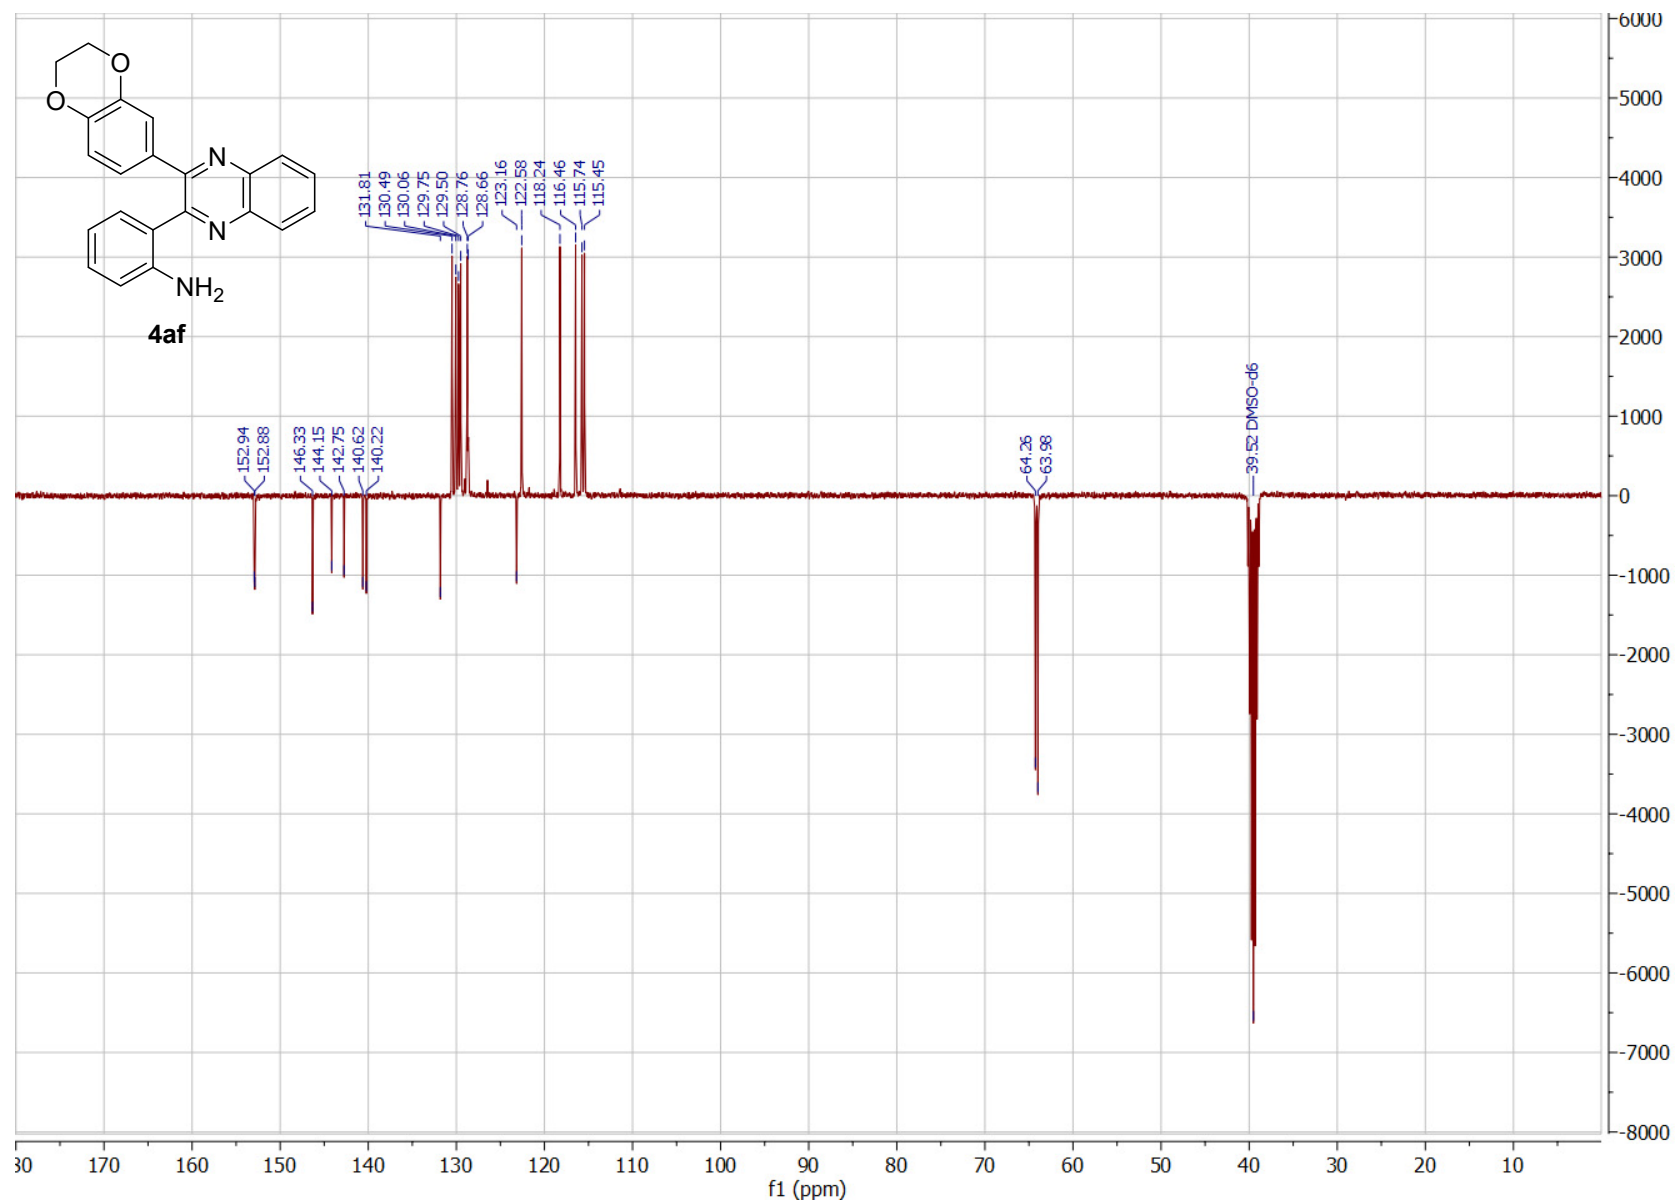

Figure S13.  $^{13}\text{C}$  DEPTQ NMR spectrum of **4af** in  $\text{DMSO}-d_6$  (101 MHz)

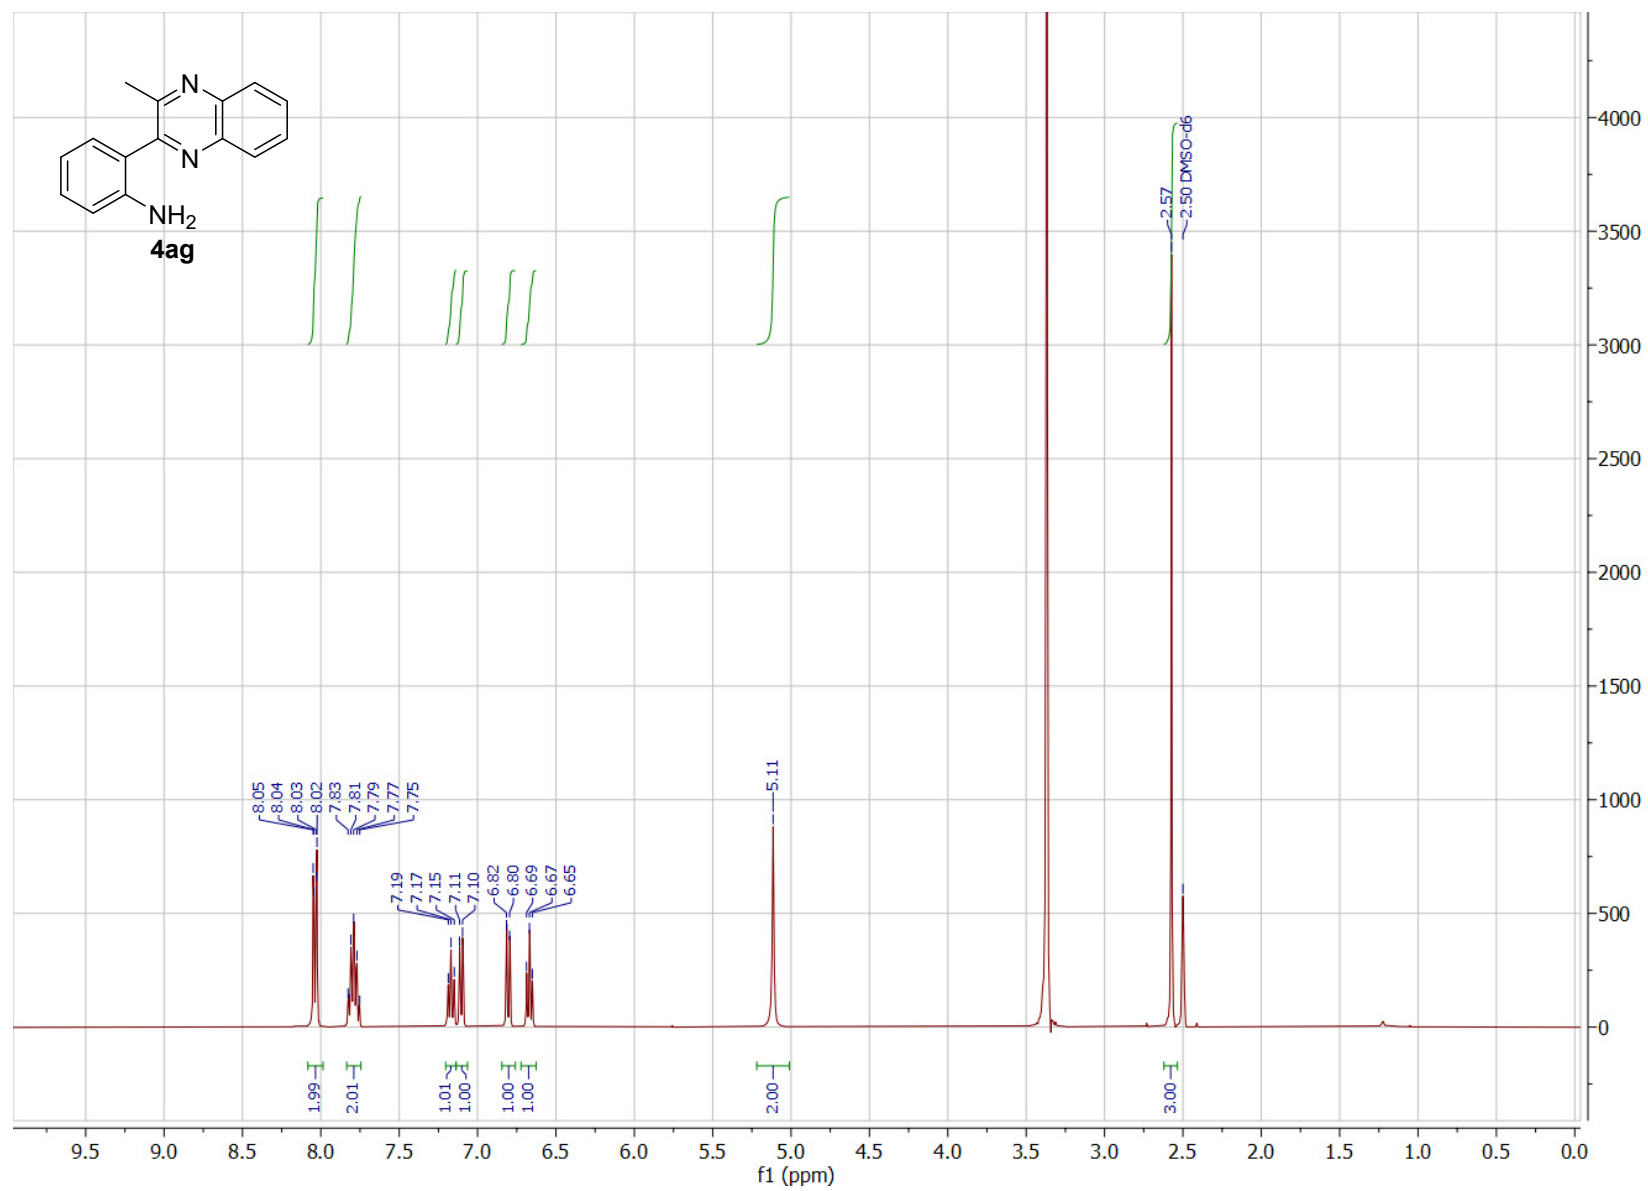

Figure S14. <sup>1</sup>H NMR spectrum of **4ag** in DMSO-*d*<sub>6</sub> (400 MHz)

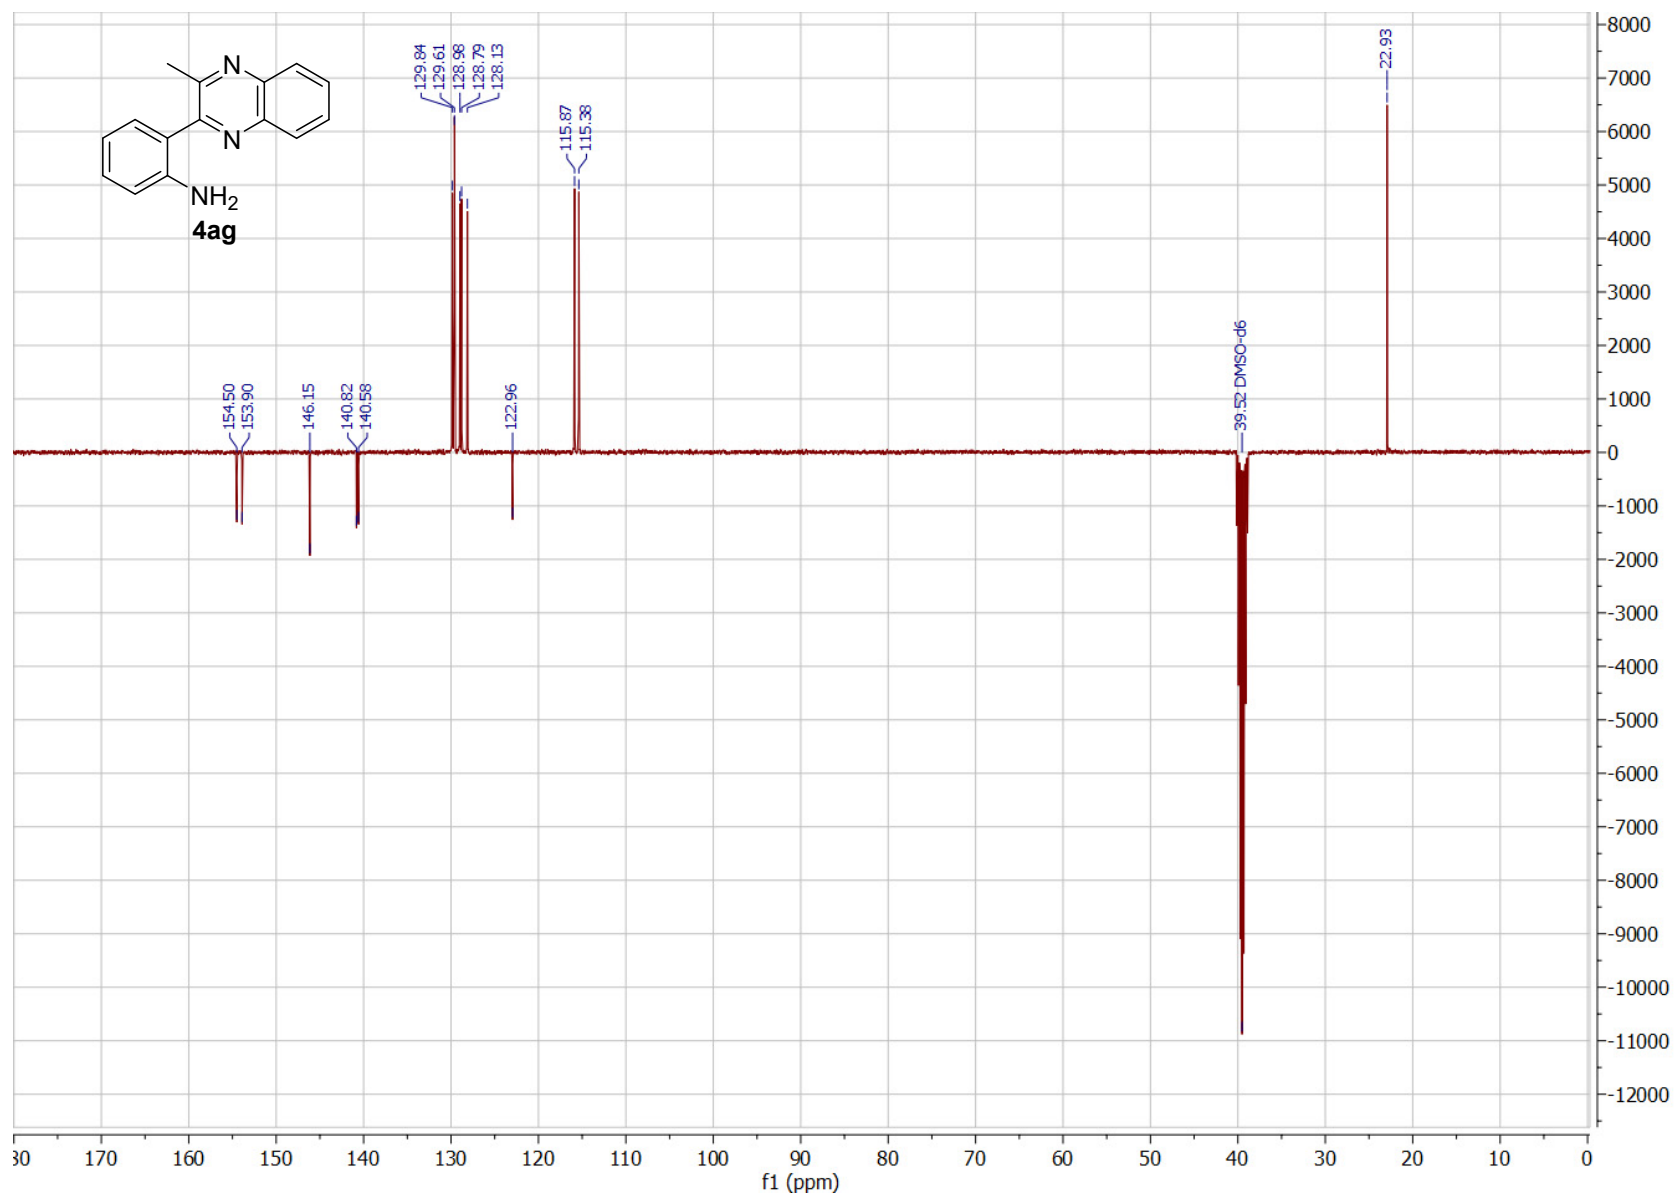

Figure S15.  $^{13}\text{C}$  DEPTQ NMR spectrum of **4ag** in DMSO- $d_6$  (101 MHz)



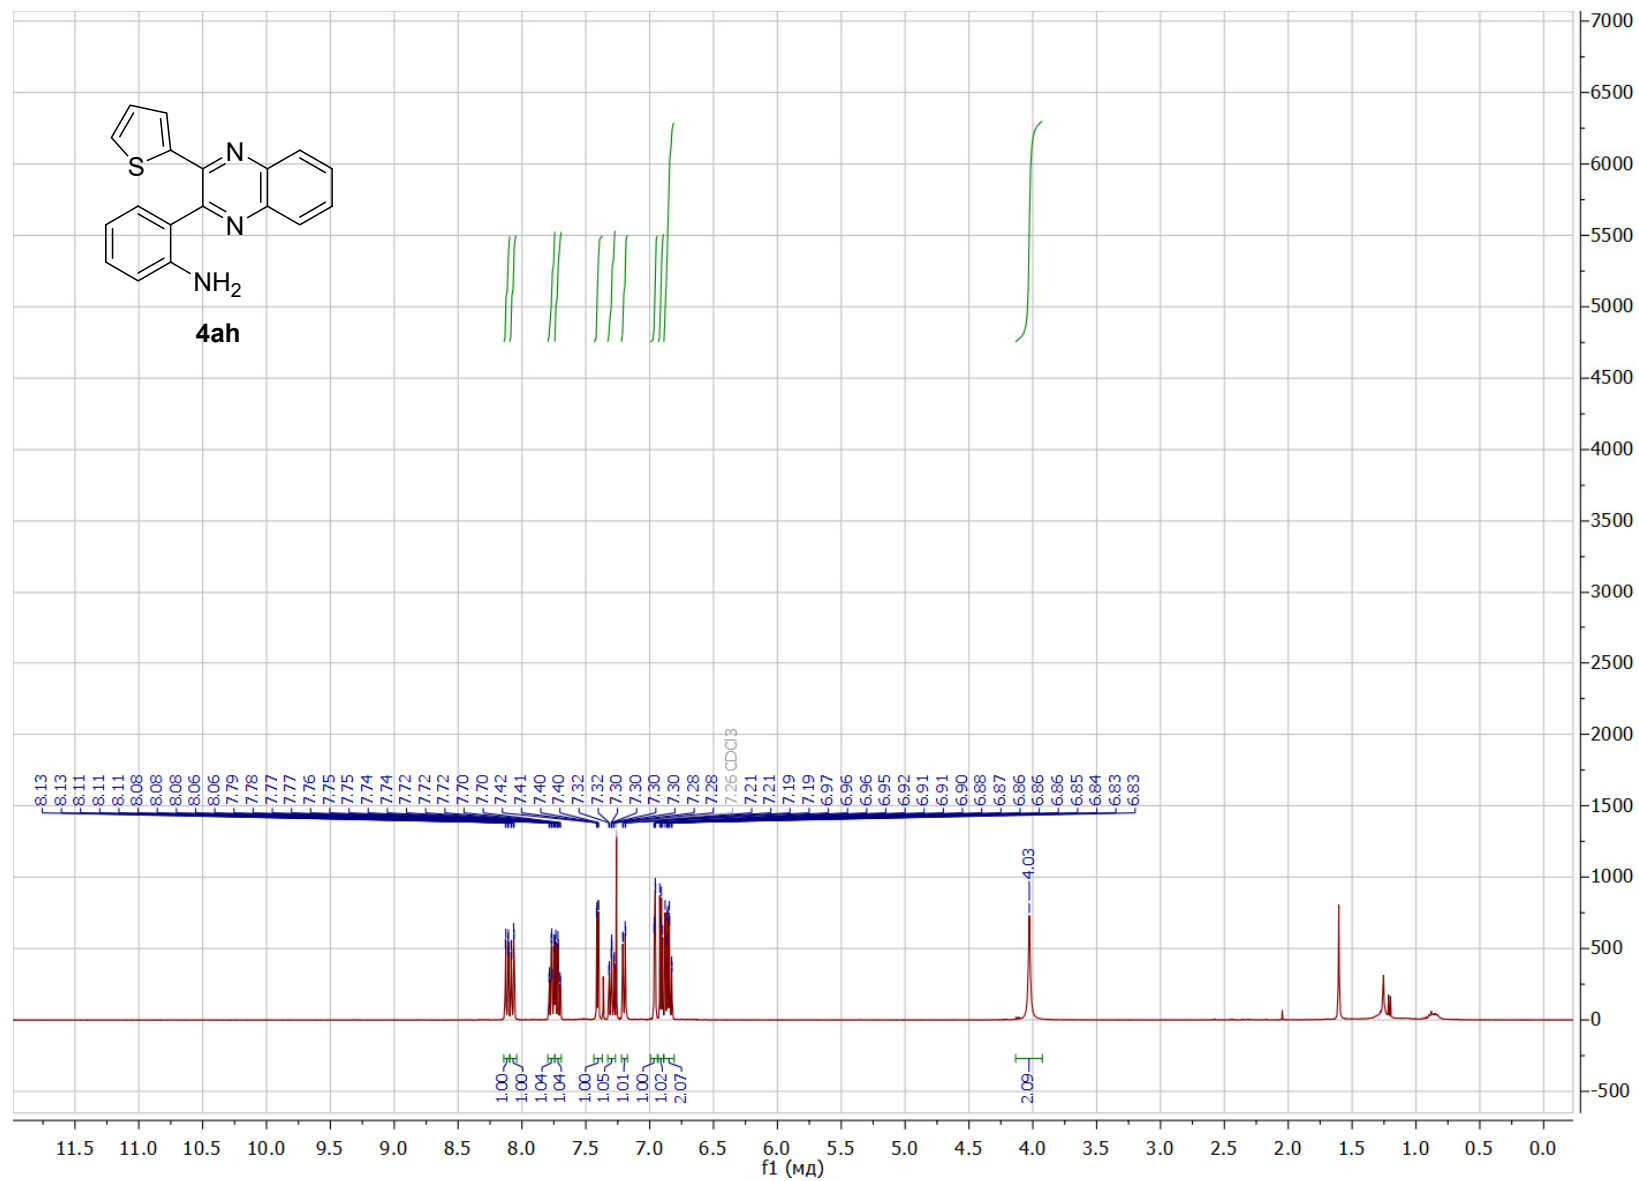

Figure S16.  $^1\text{H}$  NMR spectrum of **4ah** in  $\text{CDCl}_3$  (400 MHz)

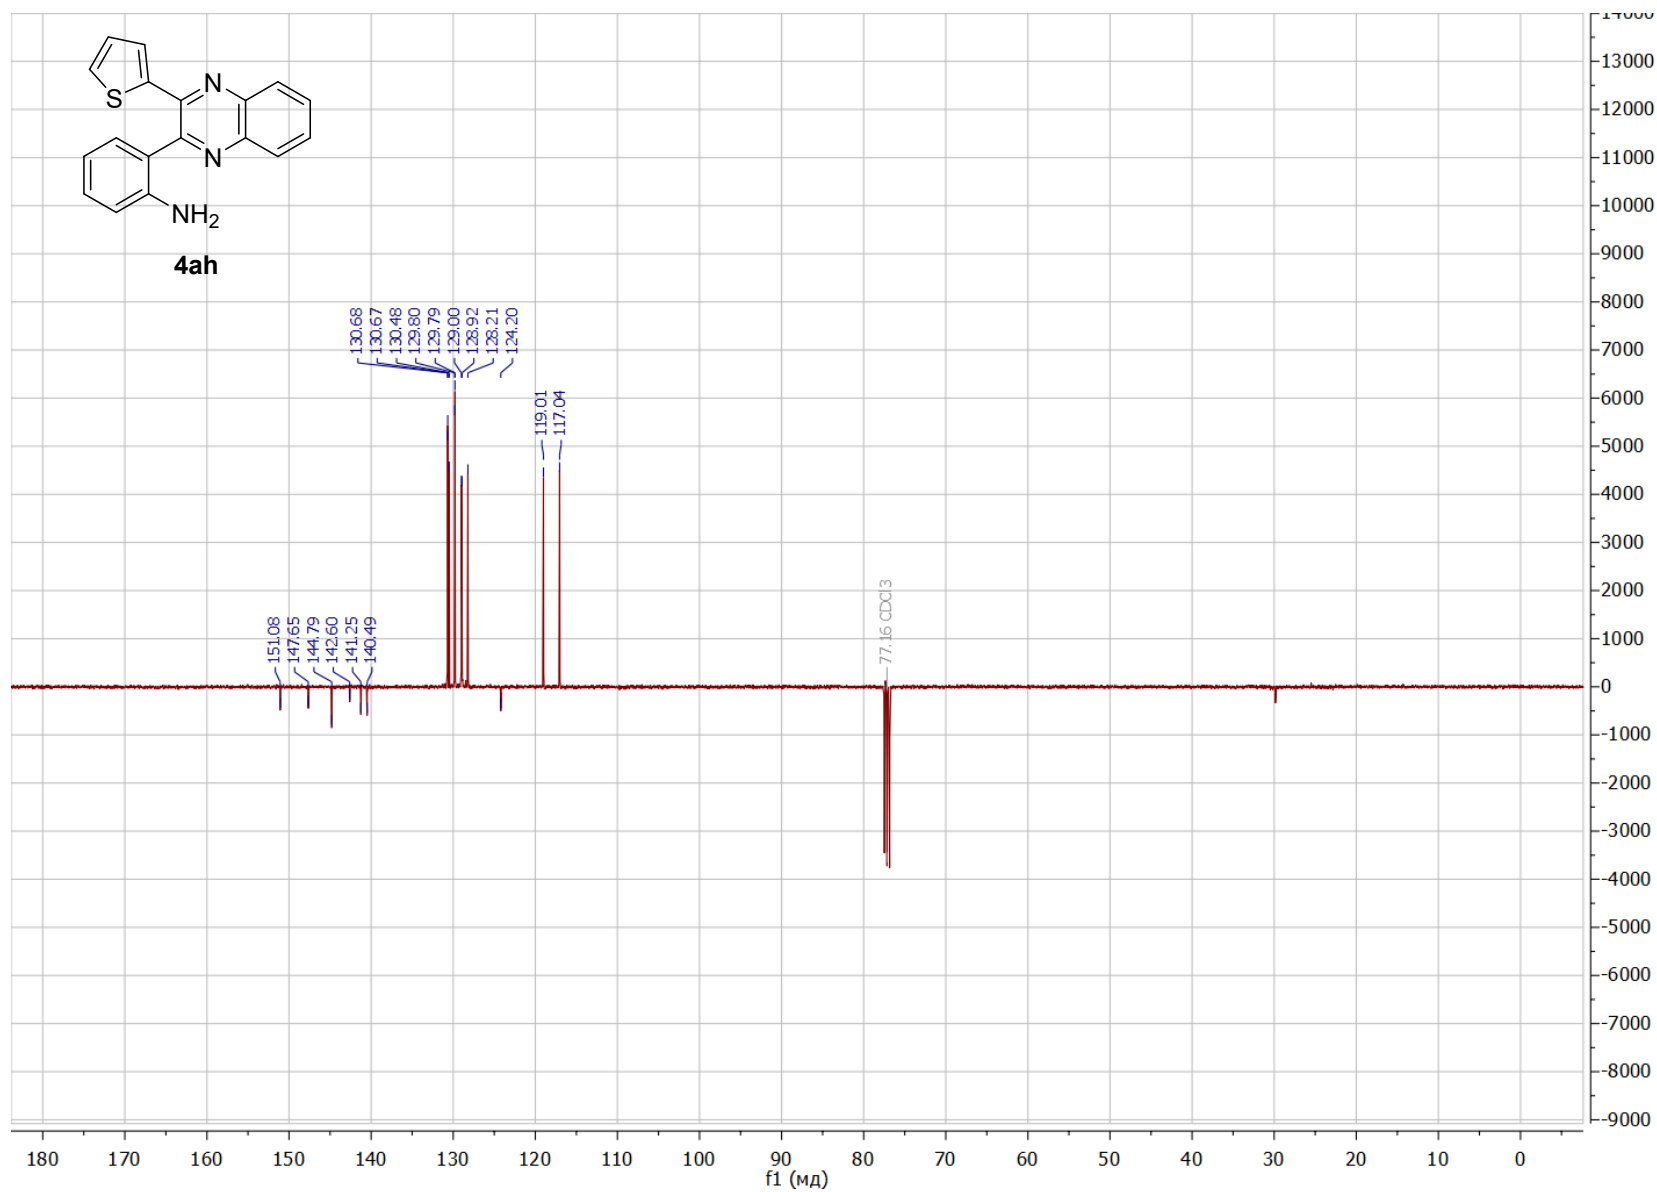

Figure S17.  $^{13}\text{C}$  DEPTQ NMR spectrum of **4ah** in  $\text{CDCl}_3$  (101 MHz)

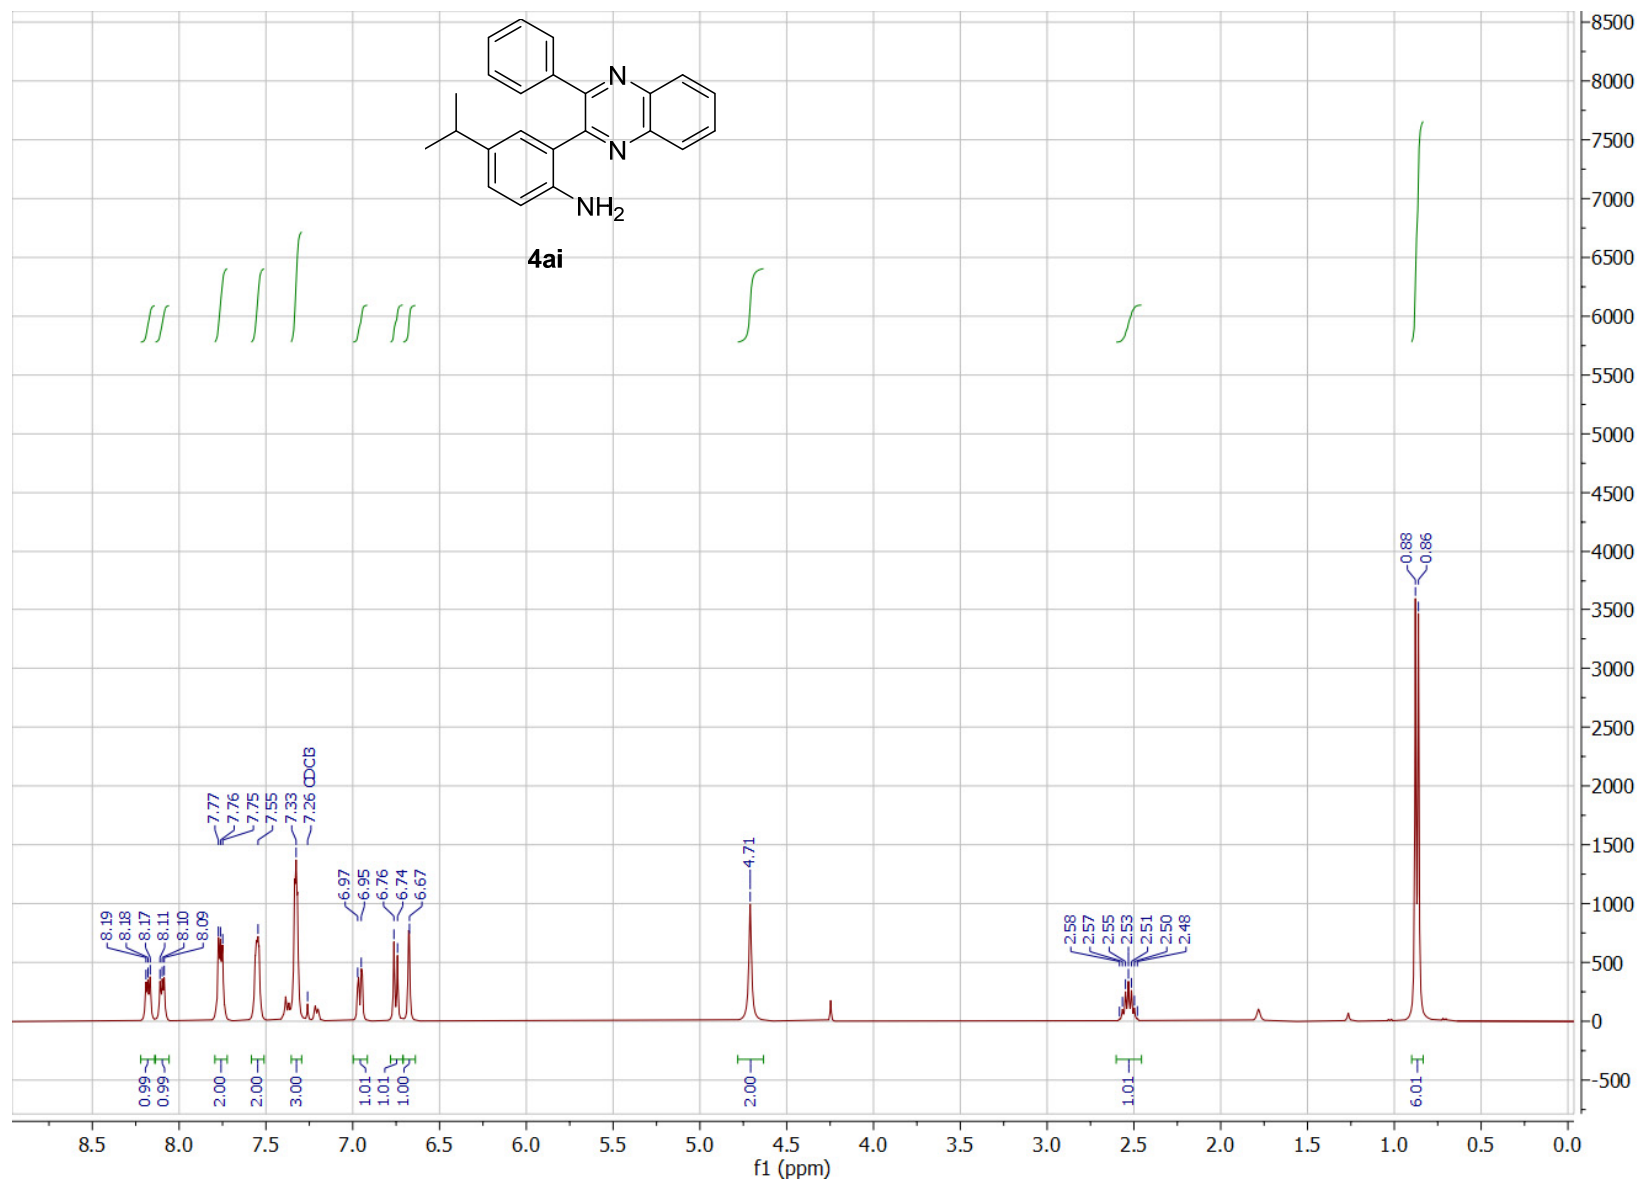

Figure S18.  $^1\text{H}$  NMR spectrum of **4ai** in  $\text{CDCl}_3$  (400 MHz)

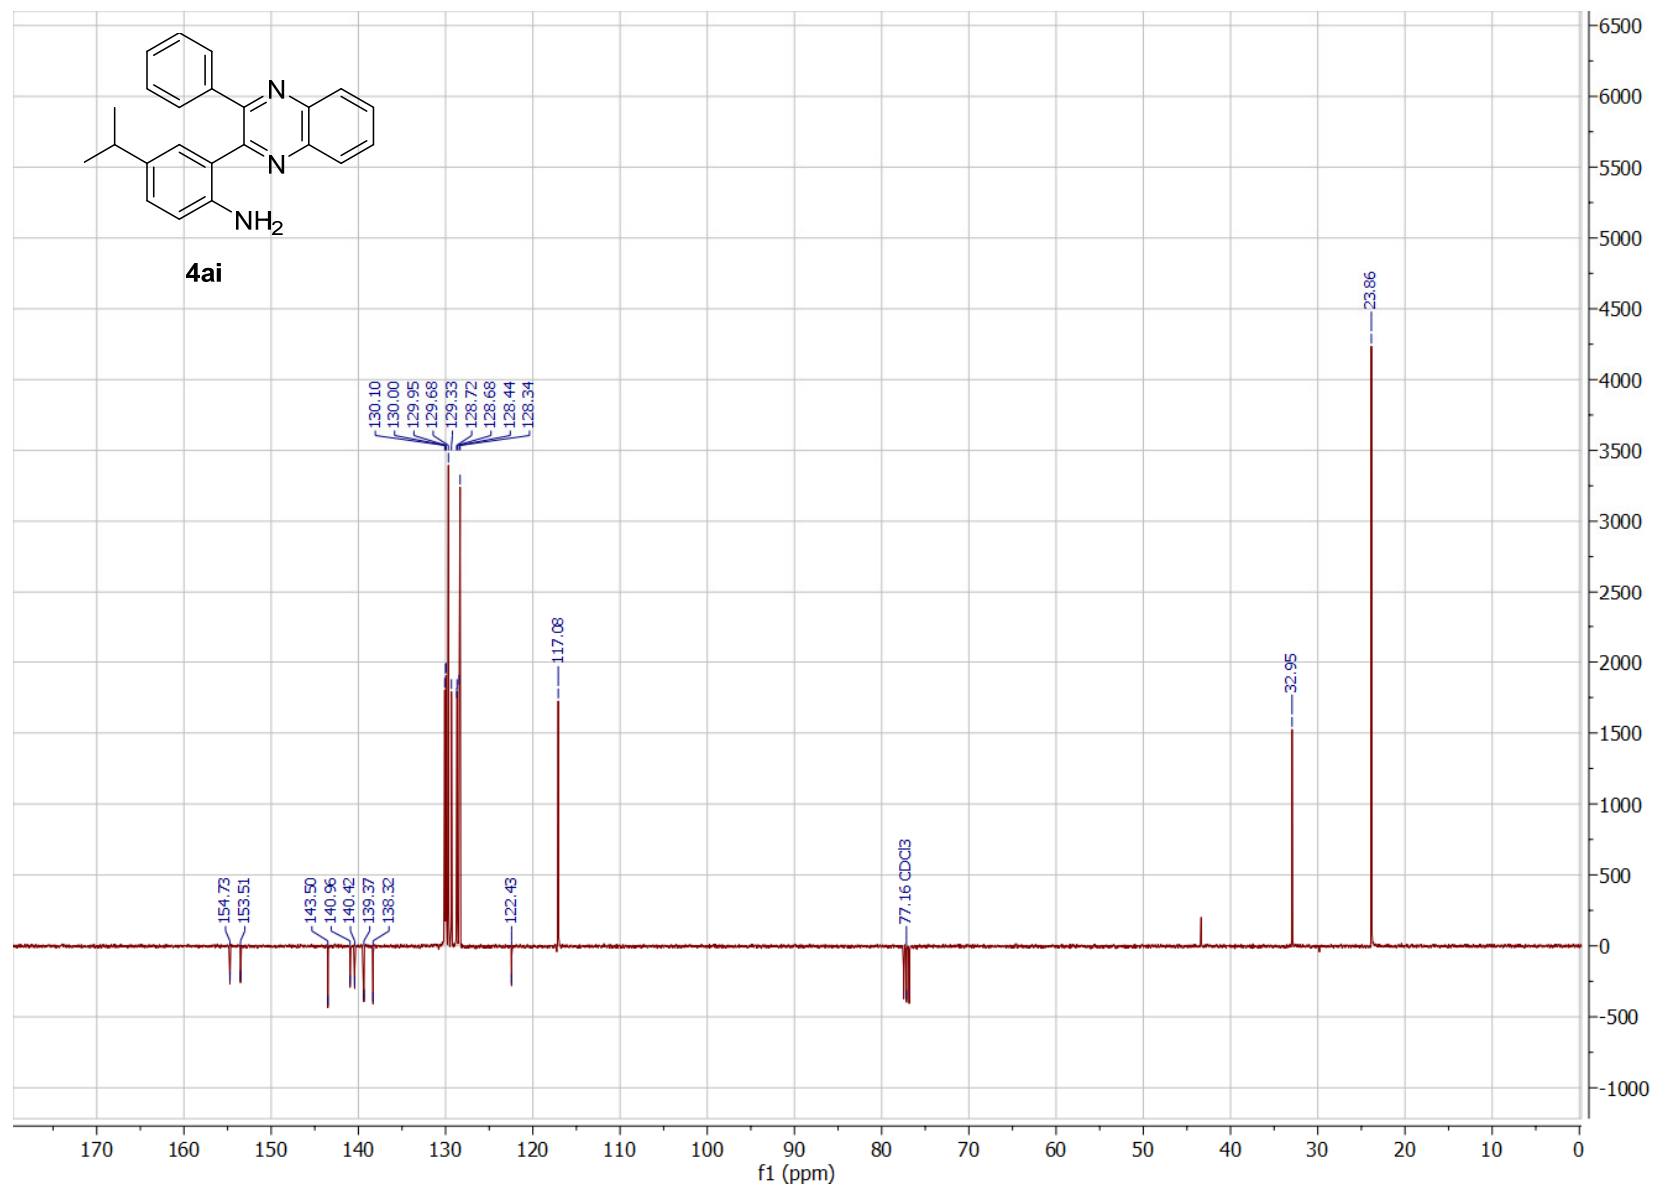

Figure S19. <sup>13</sup>C DEPTQ NMR spectrum of **4ai** in CDCl<sub>3</sub> (101 MHz)

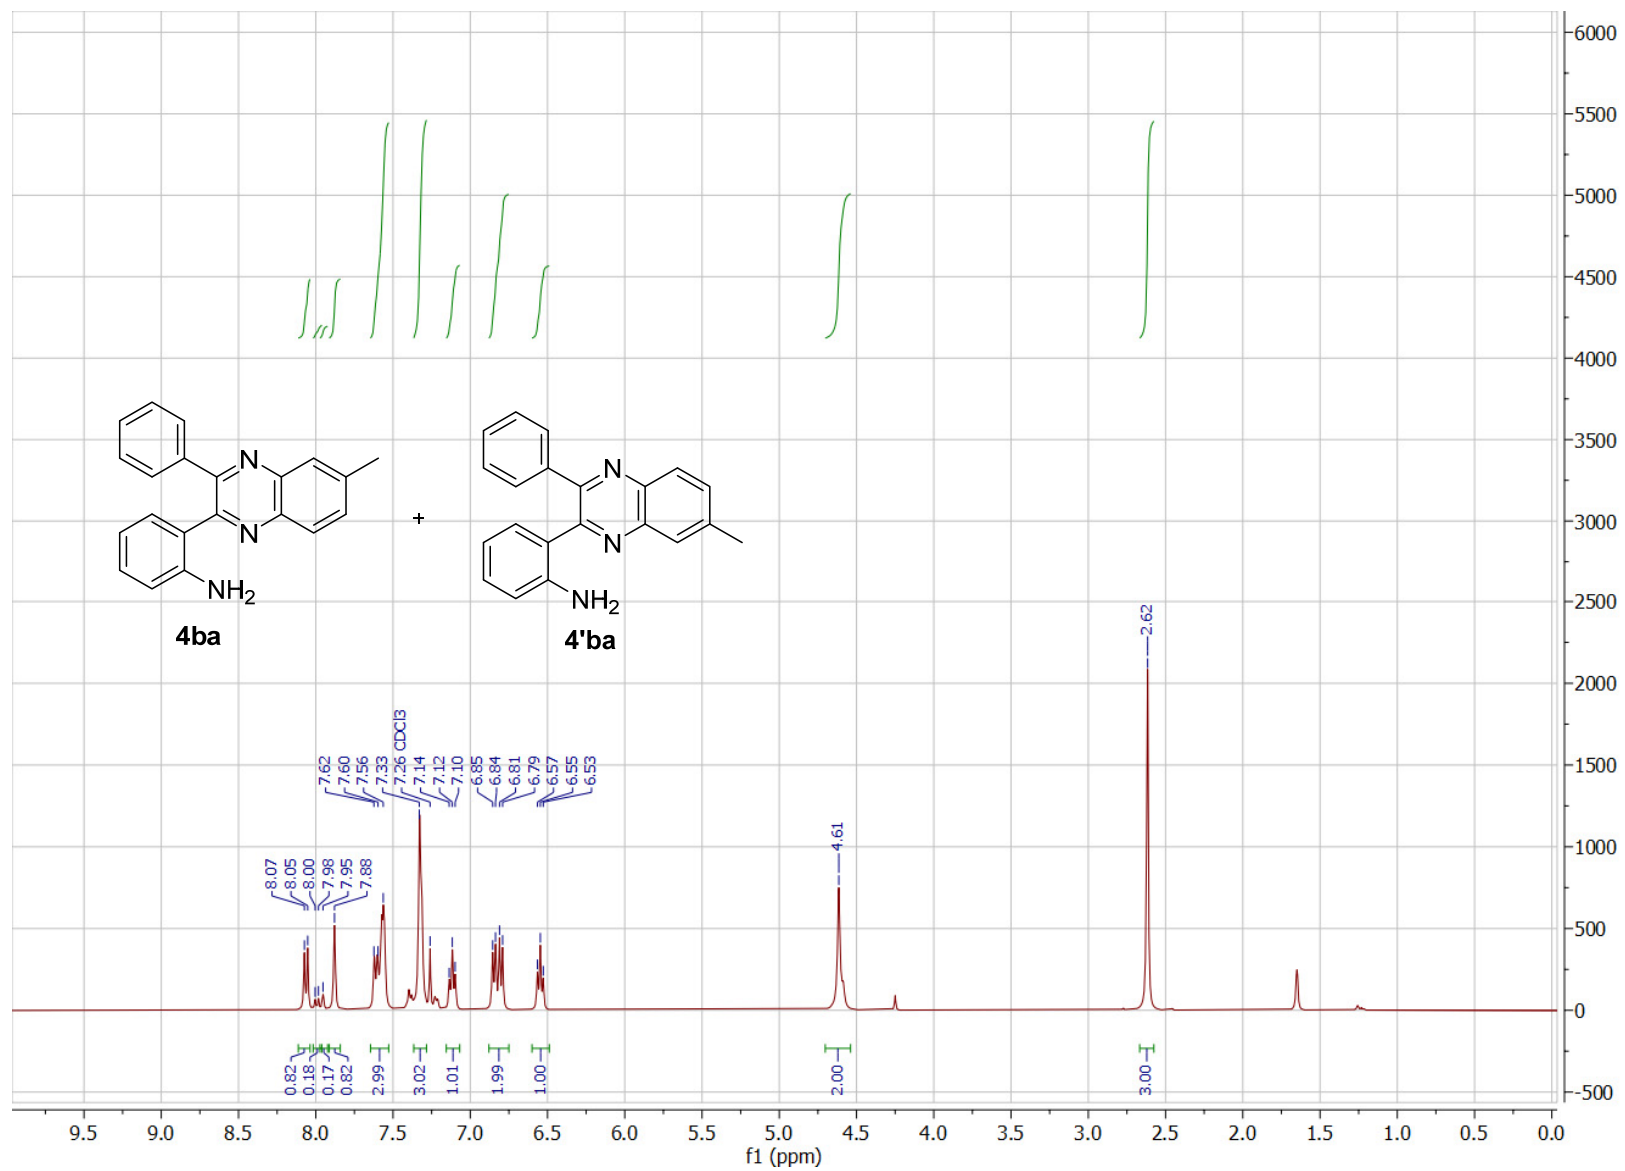

Figure S20.  $^1\text{H}$  NMR spectrum of **4ba**+**4'ba** in  $\text{CDCl}_3$  (400 MHz)

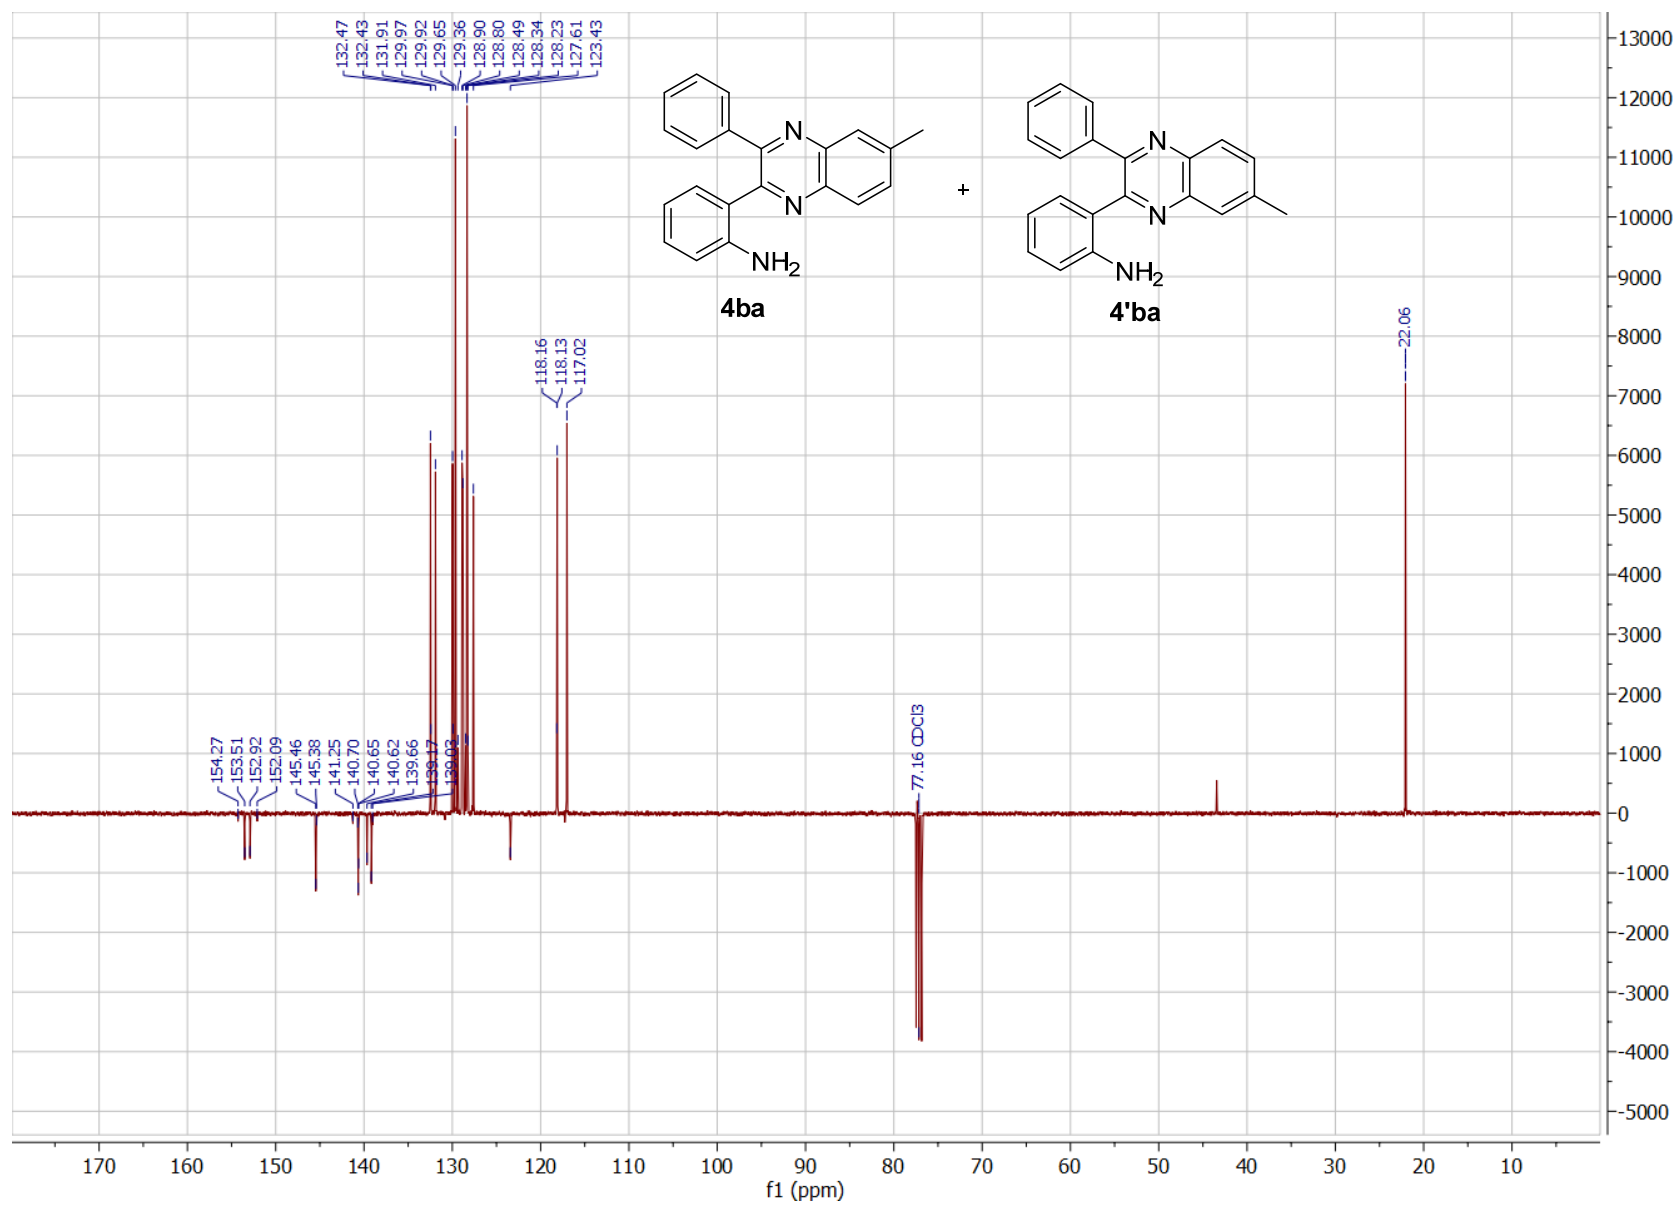

Figure S21.  $^{13}\text{C}$  DEPTQ NMR spectrum of **4ba+4'ba** in CDCl<sub>3</sub> (101 MHz)

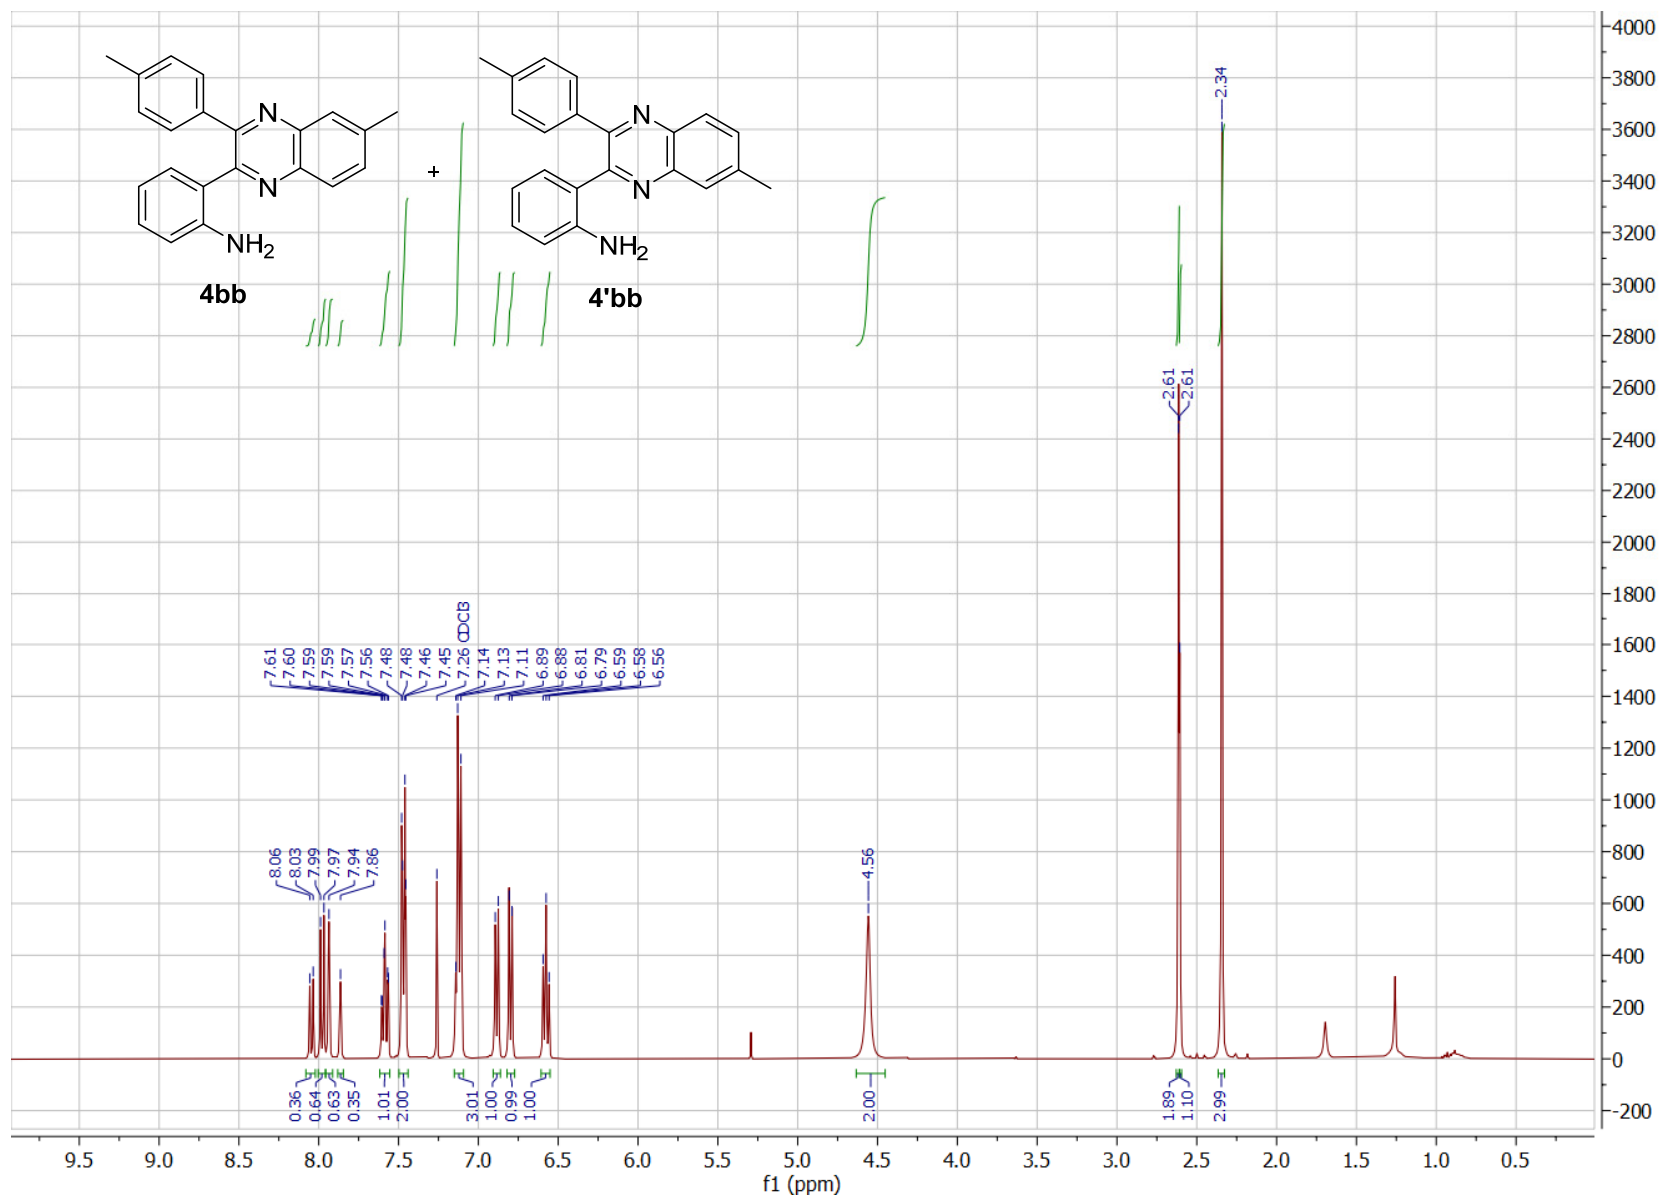

Figure S22. <sup>1</sup>H NMR spectrum of **4bb+4'bb** in CDCl<sub>3</sub> (400 MHz)

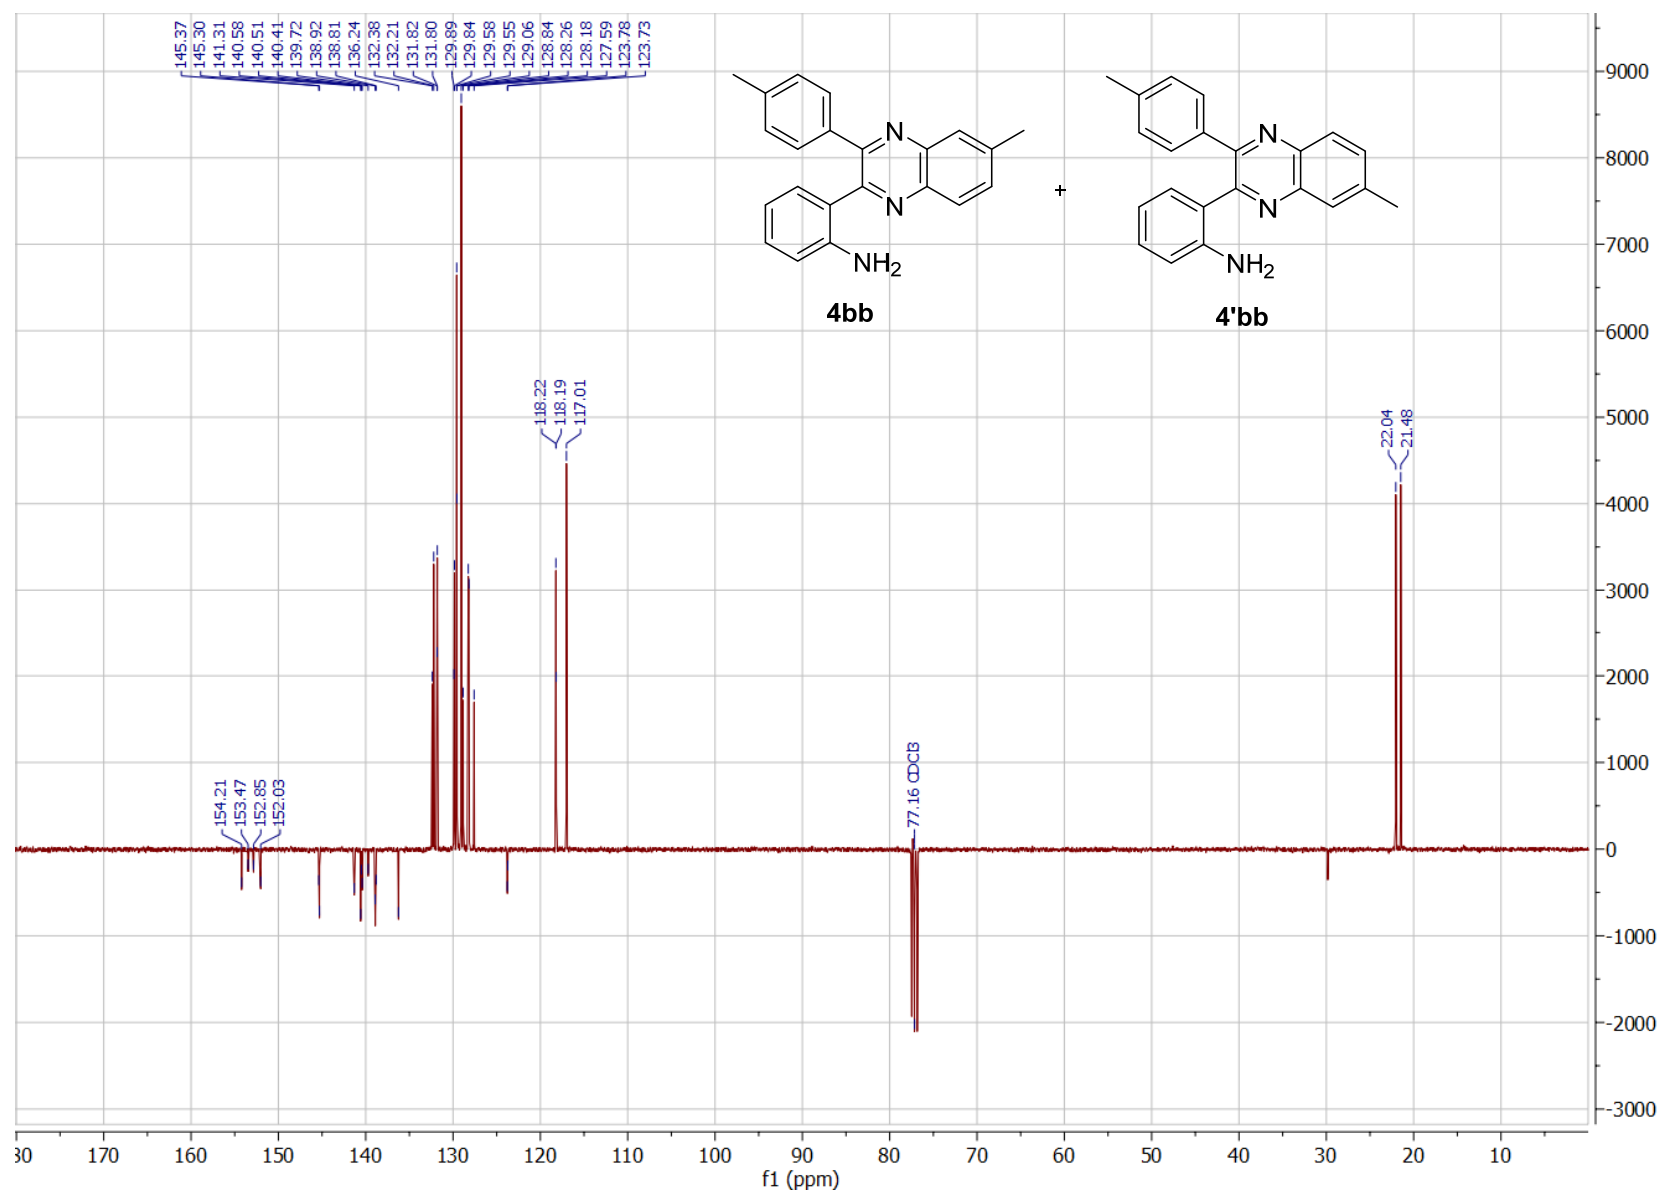

Figure S23.  $^{13}\text{C}$  DEPTQ NMR spectrum of **4bb**+**4'bb** in  $\text{CDCl}_3$  (101 MHz)



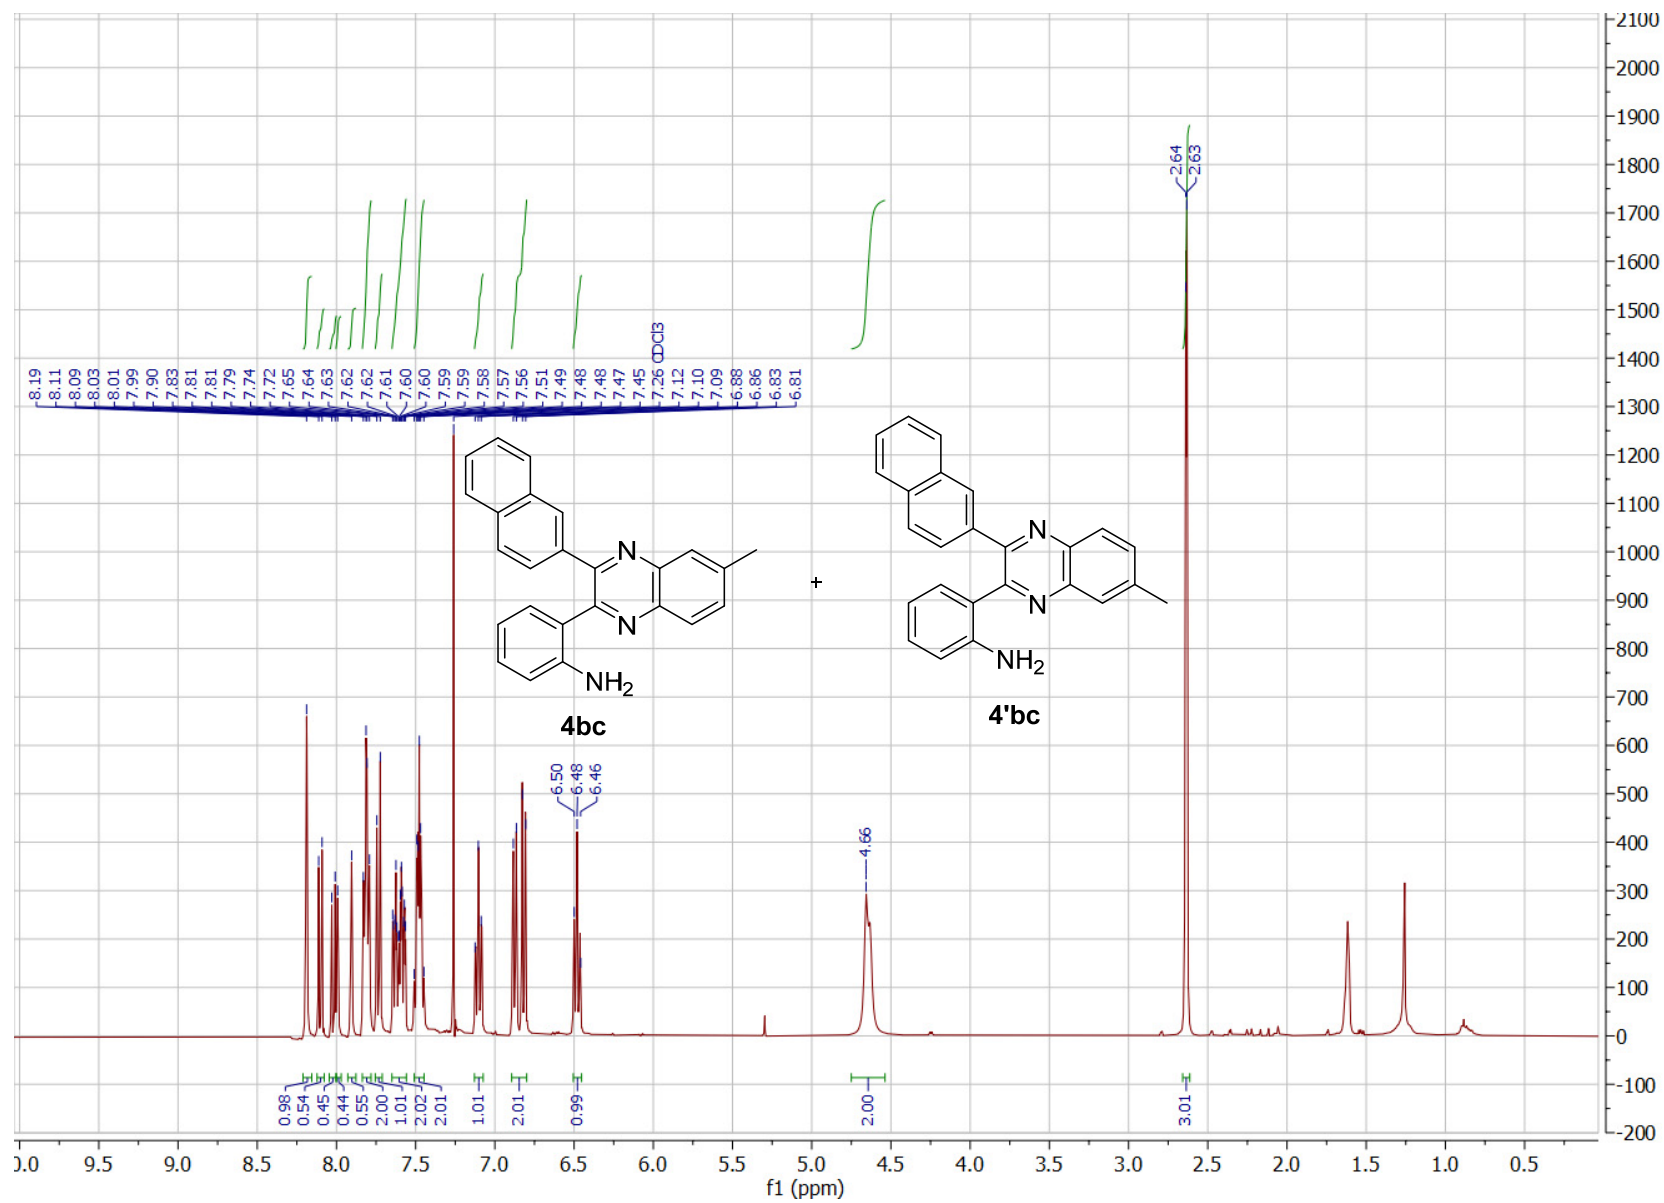

Figure S24. <sup>1</sup>H NMR spectrum of **4bc**+**4'bc** in CDCl<sub>3</sub> (400 MHz)

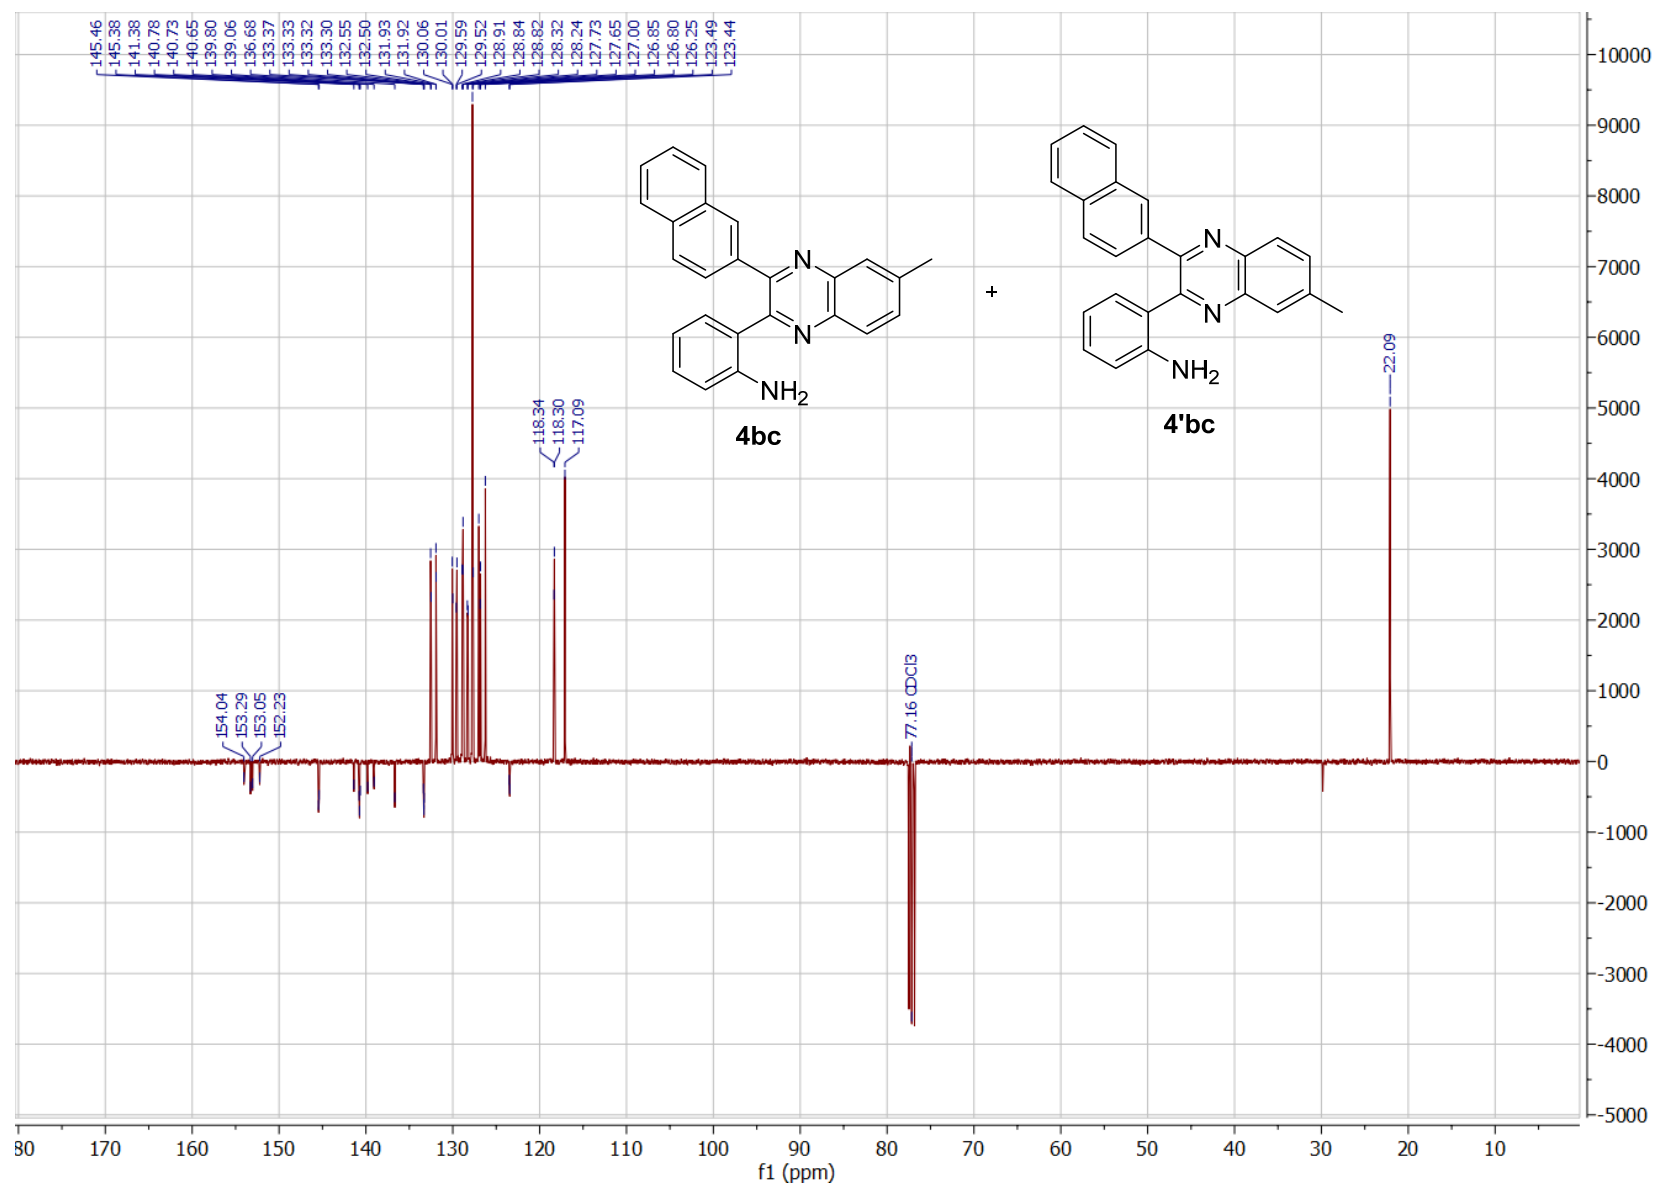

Figure S25. <sup>13</sup>C DEPTQ NMR spectrum of **4bc**+**4'bc** in CDCl<sub>3</sub> (101 MHz)

## HRMS spectral charts

### HRMS spectral charts for quinoxalines (4)

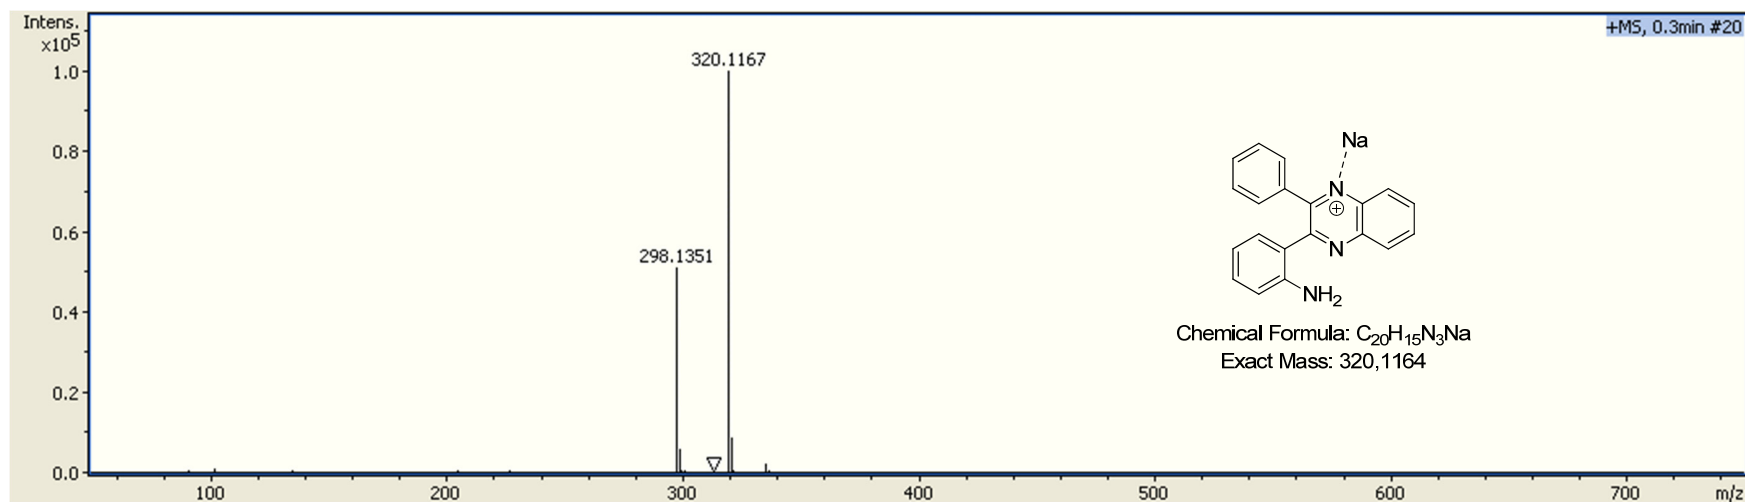

Figure S26. HRMS spectral chart for 4aa

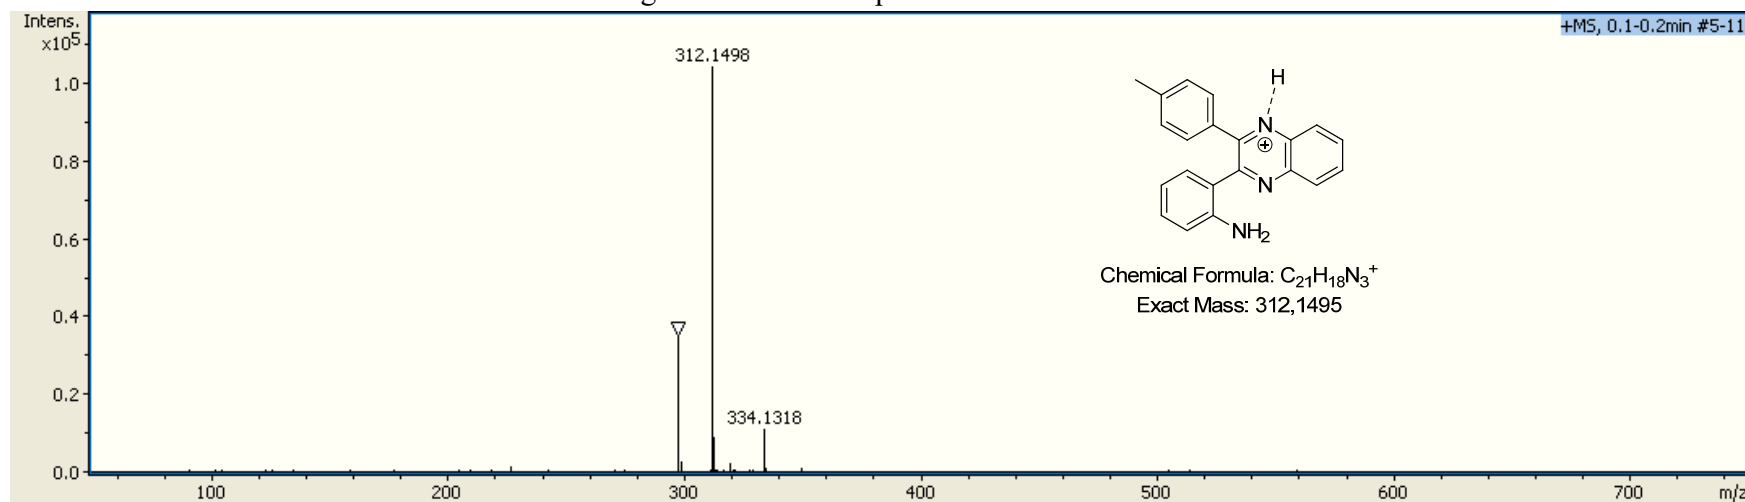

Figure S27. HRMS spectral chart for 4ab

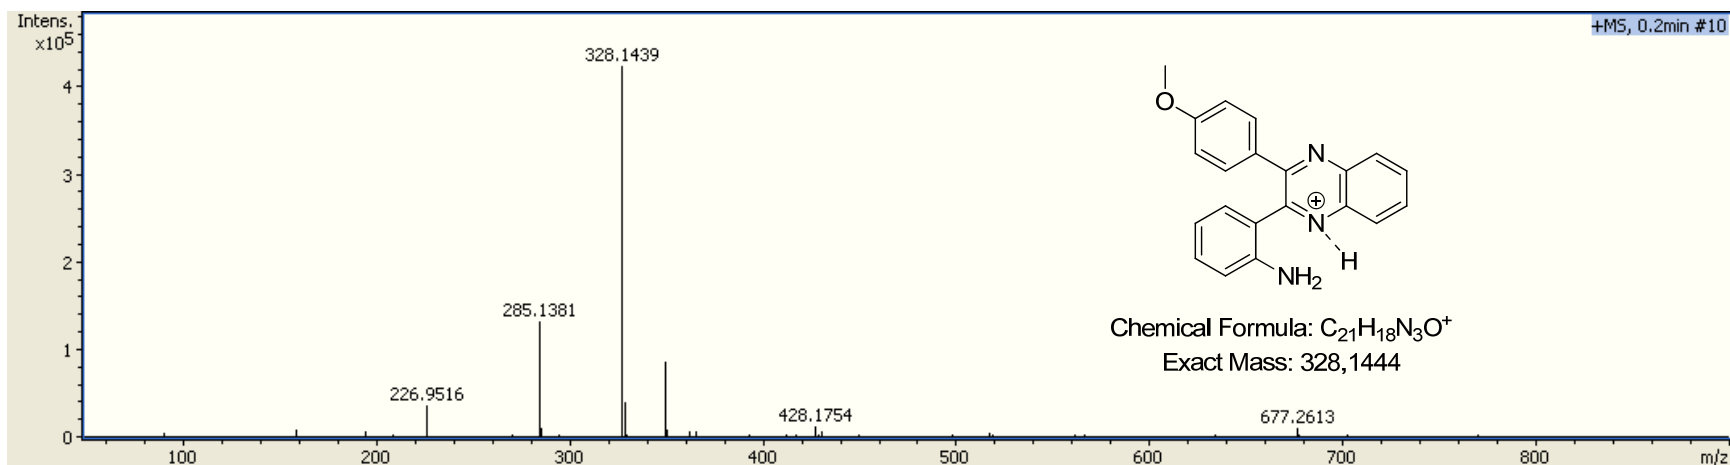

Figure S28. HRMS spectral chart for **4ac**

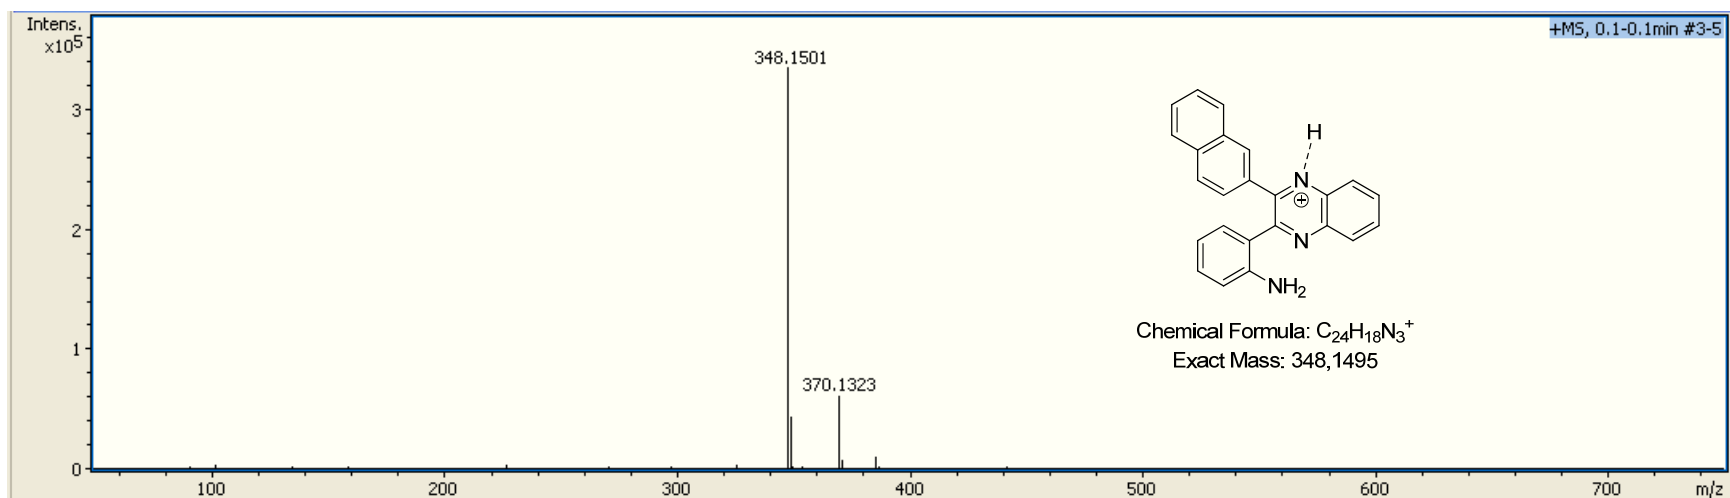

Figure S29. HRMS spectral chart for **4ad**

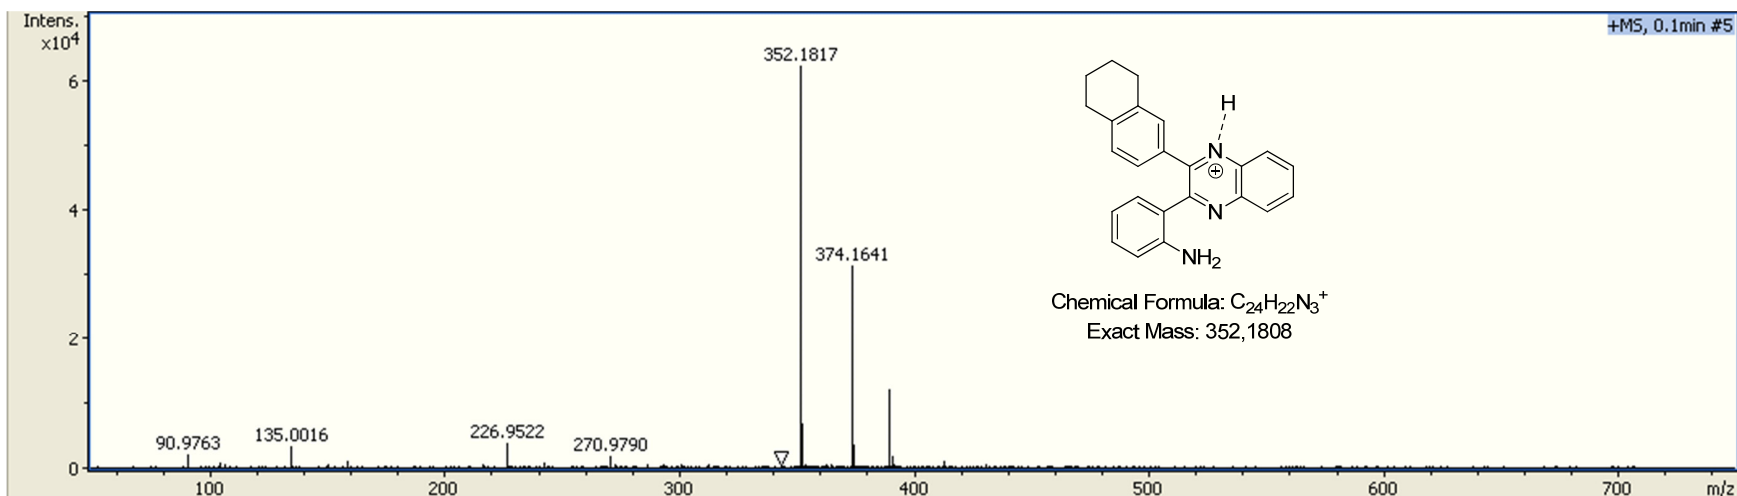

Figure S30. HRMS spectral chart for **4ae**

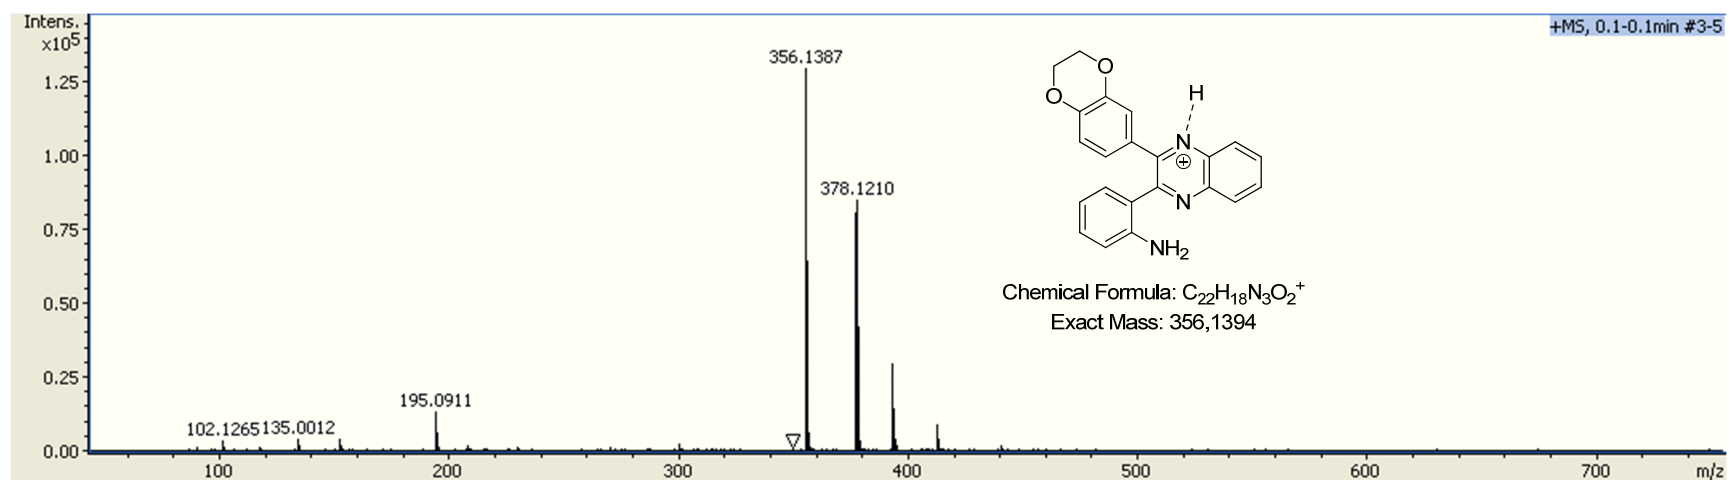

Figure S31. HRMS spectral chart for **4af**

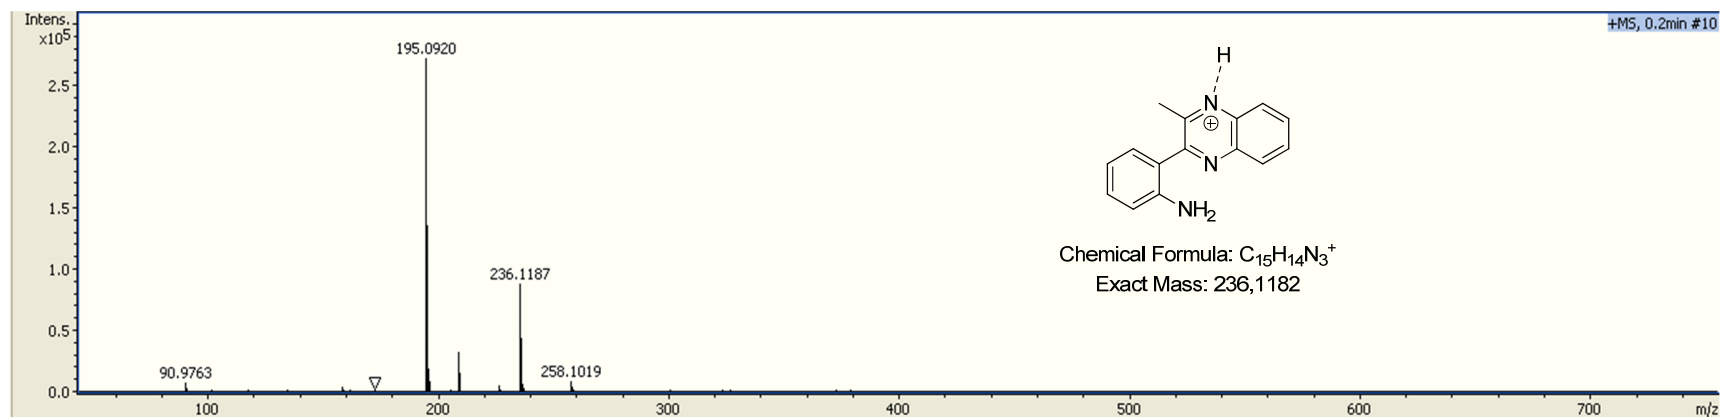

Figure S32. HRMS spectral chart for **4ag**

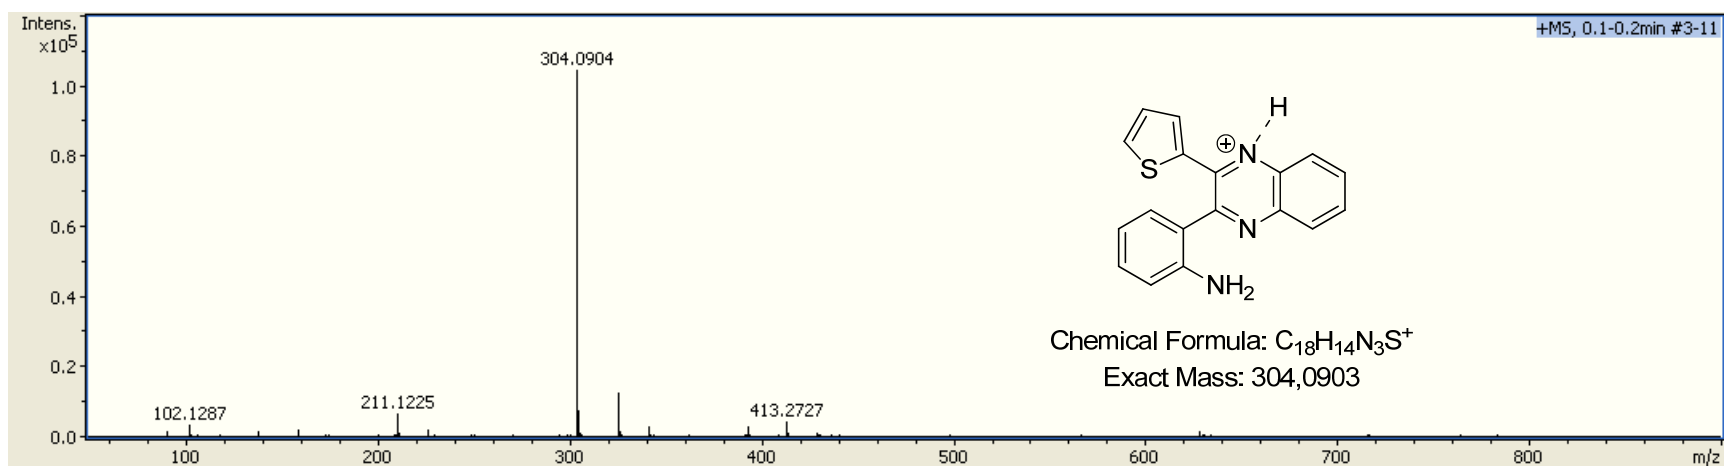

Figure S33. HRMS spectral chart for **4ah**

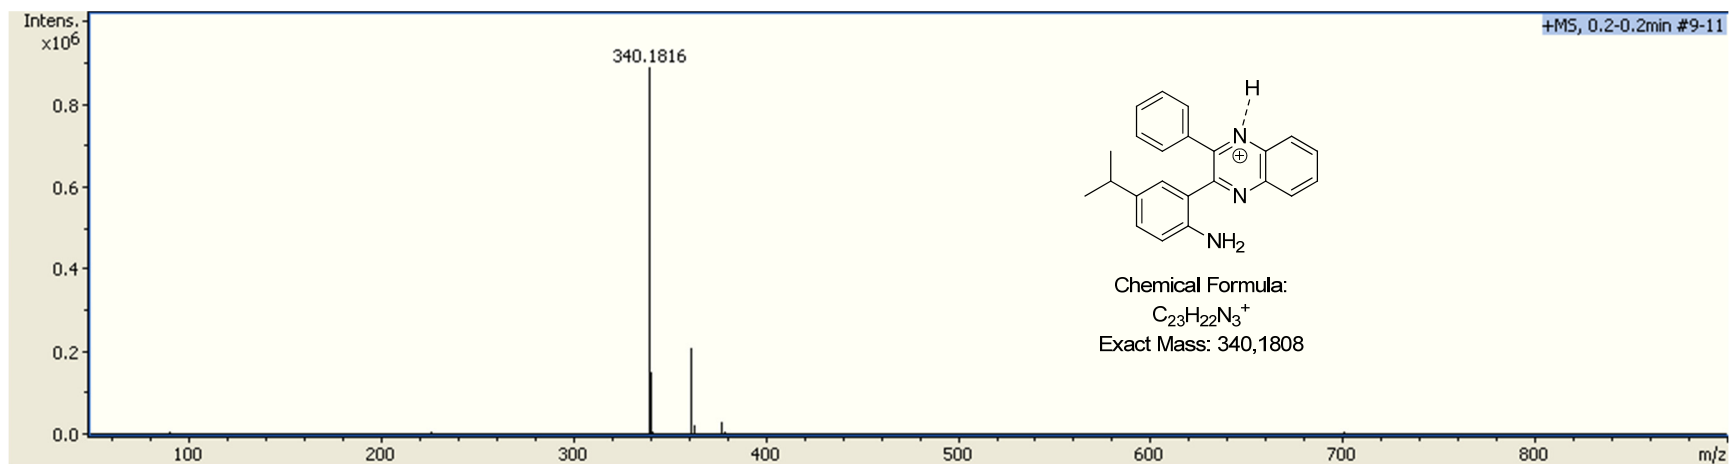

Figure S34. HRMS spectral chart for **4ai**

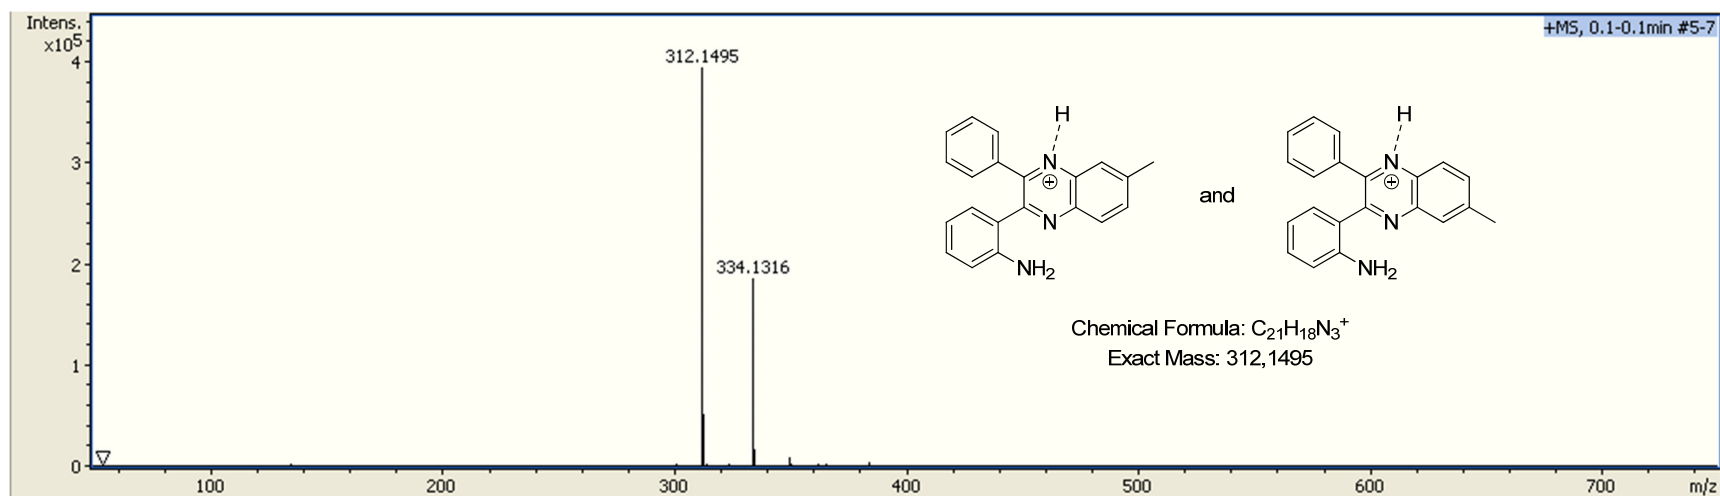

Figure S35. HRMS spectral chart for **4ba+4'ba**

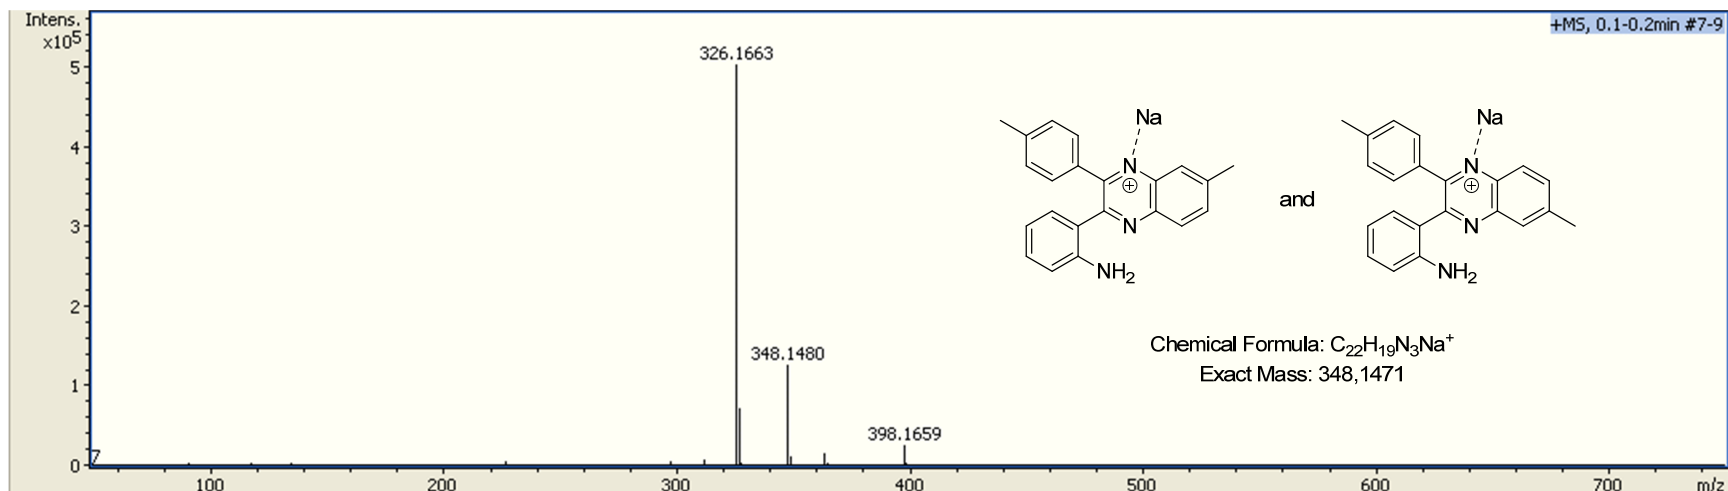

Figure S36. HRMS spectral chart for **4bb+4'bb**

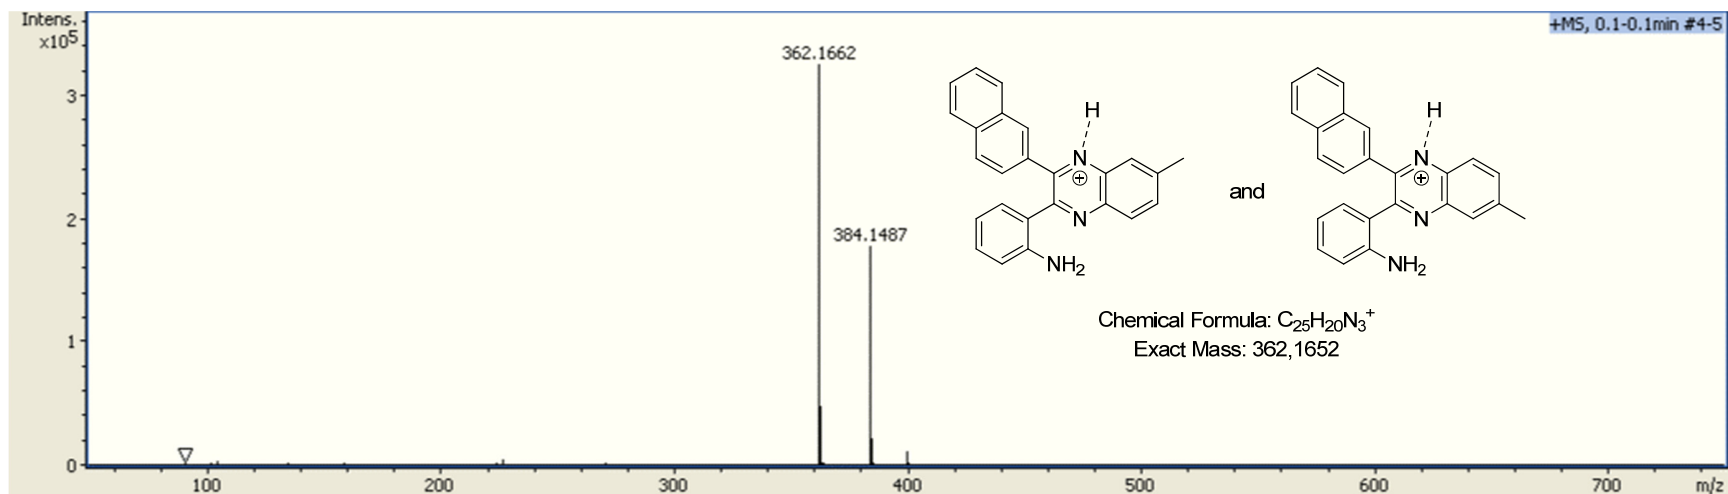

Figure S37. HRMS spectral chart for **4bc+4'bc**



## X-Ray crystallography data

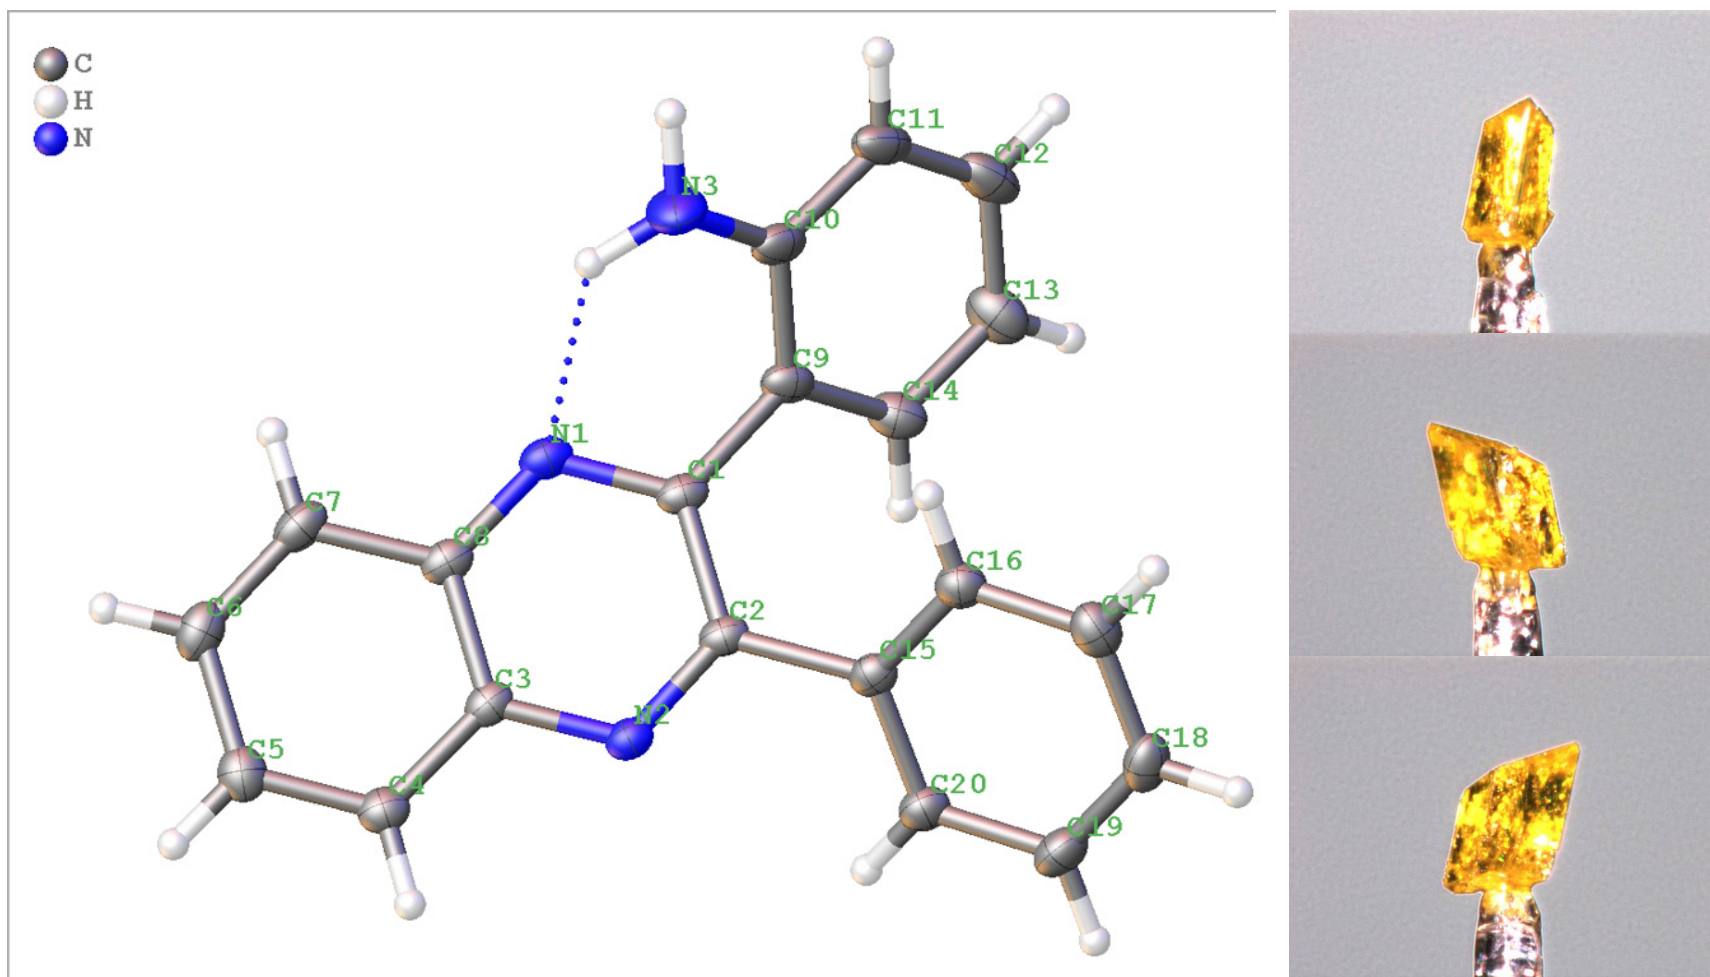

**Figure S38.** ORTEP drawing of the crystal structure showing 50% probability thermal ellipsoids (left, CCDC 2195374) and microphotography of the single crystal of compound **4aa** used for X-Ray diffraction analysis at the bottom.

**Table S1 Crystal data and structure refinement for 4aa.**

|                                                |                                                                |
|------------------------------------------------|----------------------------------------------------------------|
| Identification code                            | ANNA_KUR422_2                                                  |
| Empirical formula                              | C <sub>20</sub> H <sub>15</sub> N <sub>3</sub>                 |
| Formula weight                                 | 297.35                                                         |
| Temperature/K                                  | 100.00(10)                                                     |
| Crystal system                                 | monoclinic                                                     |
| Space group                                    | P2 <sub>1</sub> /n                                             |
| a/Å                                            | 14.4029(4)                                                     |
| b/Å                                            | 6.66847(16)                                                    |
| c/Å                                            | 16.3992(4)                                                     |
| $\alpha/^\circ$                                | 90                                                             |
| $\beta/^\circ$                                 | 103.136(2)                                                     |
| $\gamma/^\circ$                                | 90                                                             |
| Volume/Å <sup>3</sup>                          | 1533.86(7)                                                     |
| Z                                              | 4                                                              |
| $\rho_{\text{calc}}/\text{cm}^{-3}$            | 1.288                                                          |
| $\mu/\text{mm}^{-1}$                           | 0.607                                                          |
| F(000)                                         | 624.0                                                          |
| Crystal size/mm <sup>3</sup>                   | 0.478 × 0.279 × 0.188                                          |
| Radiation                                      | Cu K $\alpha$ ( $\lambda$ = 1.54184)                           |
| 2 $\theta$ range for data collection/ $^\circ$ | 7.382 to 152.812                                               |
| Index ranges                                   | -18 ≤ h ≤ 17, -8 ≤ k ≤ 8, -20 ≤ l ≤ 19                         |
| Reflections collected                          | 16681                                                          |
| Independent reflections                        | 3222 [ $R_{\text{int}}$ = 0.0303, $R_{\text{sigma}}$ = 0.0184] |
| Data/restraints/parameters                     | 3222/0/217                                                     |
| Goodness-of-fit on F <sup>2</sup>              | 1.065                                                          |
| Final R indexes [ $I \geq 2\sigma(I)$ ]        | $R_1$ = 0.0441, $wR_2$ = 0.1182                                |
| Final R indexes [all data]                     | $R_1$ = 0.0459, $wR_2$ = 0.1199                                |
| Largest diff. peak/hole / e Å <sup>-3</sup>    | 0.44/-0.21                                                     |

**Table S2 Fractional Atomic Coordinates ( $\times 10^4$ ) and Equivalent Isotropic Displacement Parameters ( $\text{\AA}^2 \times 10^3$ ) for 4aa.  $U_{\text{eq}}$  is defined as 1/3 of of the trace of the orthogonalised  $U_{\text{IJ}}$  tensor.**

| Atom | <i>x</i>   | <i>y</i>    | <i>z</i>   | $U(\text{eq})$ |
|------|------------|-------------|------------|----------------|
| N1   | 3567.9 (7) | 7549.0 (14) | 3813.0 (6) | 20.4 (2)       |
| N2   | 4091.5 (7) | 7452.9 (13) | 5571.4 (6) | 18.1 (2)       |
| C8   | 4501.2 (9) | 7462.3 (16) | 4222.0 (7) | 19.5 (3)       |
| C2   | 3188.7 (8) | 7400.0 (16) | 5165.7 (7) | 17.8 (2)       |
| C1   | 2915.9 (8) | 7569.1 (16) | 4266.6 (7) | 18.7 (2)       |
| C3   | 4765.3 (8) | 7506.2 (16) | 5107.3 (7) | 18.1 (2)       |
| C15  | 2488.3 (8) | 7081.5 (17) | 5695.1 (7) | 19.1 (2)       |
| C4   | 5743.0 (9) | 7507.9 (16) | 5513.5 (8) | 21.1 (3)       |
| C16  | 1723.8 (8) | 5749.9 (18) | 5458.8 (7) | 22.3 (3)       |
| C7   | 5218.3 (9) | 7369.2 (17) | 3757.7 (8) | 23.7 (3)       |
| C5   | 6421.1 (9) | 7452.3 (17) | 5048.8 (8) | 23.4 (3)       |
| N3   | 2040.9 (9) | 5093 (2)    | 2851.1 (7) | 35.0 (3)       |
| C20  | 2633.8 (8) | 8027.2 (18) | 6471.8 (7) | 22.0 (3)       |
| C9   | 1911.2 (8) | 7831.6 (18) | 3808.7 (7) | 21.2 (3)       |
| C6   | 6157.0 (9) | 7373.5 (18) | 4166.4 (8) | 25.1 (3)       |
| C18  | 1270.9 (9) | 6348 (2)    | 6764.5 (8) | 27.2 (3)       |
| C17  | 1124.1 (9) | 5377.1 (19) | 5995.5 (8) | 26.1 (3)       |
| C10  | 1519.4 (9) | 6634 (2)    | 3101.8 (7) | 25.1 (3)       |
| C12  | 22.7 (9)   | 8408 (2)    | 2972.1 (8) | 32.4 (3)       |
| C19  | 2022.2 (9) | 7681 (2)    | 7000.0 (8) | 26.9 (3)       |
| C14  | 1348.4 (9) | 9271.1 (18) | 4078.2 (8) | 25.4 (3)       |
| C11  | 563.9 (9)  | 6956 (2)    | 2698.2 (7) | 29.4 (3)       |
| C13  | 406.2 (9)  | 9582 (2)    | 3667.6 (9) | 31.6 (3)       |

**Table S3 Anisotropic Displacement Parameters ( $\text{\AA}^2 \times 10^3$ ) for 4aa. The Anisotropic displacement factor exponent takes the form: -  $2\pi^2[h^2a^{*2}U_{11}+2hka^*b^*U_{12}+\dots]$ .**

| Atom | U <sub>11</sub> | U <sub>22</sub> | U <sub>33</sub> | U <sub>23</sub> | U <sub>13</sub> | U <sub>12</sub> |
|------|-----------------|-----------------|-----------------|-----------------|-----------------|-----------------|
| N1   | 28.9 (5)        | 16.1 (5)        | 15.7 (5)        | 0.3 (3)         | 4.4 (4)         | -0.6 (4)        |
| N2   | 23.4 (5)        | 14.9 (5)        | 16.1 (5)        | -0.5 (3)        | 4.6 (4)         | 0.6 (4)         |
| C8   | 28.3 (6)        | 12.9 (5)        | 17.5 (5)        | 1.4 (4)         | 5.8 (4)         | 1.0 (4)         |
| C2   | 24.6 (6)        | 12.9 (5)        | 15.4 (5)        | -0.7 (4)        | 3.7 (4)         | 0.6 (4)         |
| C1   | 26.4 (6)        | 13.6 (5)        | 15.4 (5)        | -0.5 (4)        | 3.3 (4)         | -1.3 (4)        |
| C3   | 25.3 (6)        | 12.4 (5)        | 17.6 (5)        | 0.3 (4)         | 6.7 (4)         | 0.8 (4)         |
| C15  | 22.2 (5)        | 17.9 (5)        | 16.6 (5)        | 2.7 (4)         | 3.3 (4)         | 3.3 (4)         |
| C4   | 26.6 (6)        | 15.8 (6)        | 20.5 (6)        | -0.7 (4)        | 4.7 (5)         | -0.1 (4)        |
| C16  | 24.1 (5)        | 21.6 (6)        | 20.3 (5)        | 1.0 (4)         | 3.2 (4)         | 0.8 (4)         |
| C7   | 35.7 (7)        | 18.5 (6)        | 19.4 (5)        | 1.9 (4)         | 11.3 (5)        | 2.1 (5)         |
| C5   | 24.5 (6)        | 16.3 (6)        | 30.3 (6)        | 0.4 (4)         | 8.1 (5)         | 0.4 (4)         |
| N3   | 36.0 (6)        | 40.8 (7)        | 27.5 (6)        | -15.9 (5)       | 5.7 (5)         | -6.1 (5)        |
| C20  | 26.2 (6)        | 21.9 (6)        | 17.9 (5)        | 1.3 (4)         | 4.8 (4)         | 0.7 (5)         |
| C9   | 26.0 (6)        | 20.7 (6)        | 15.4 (5)        | 3.3 (4)         | 1.6 (4)         | -3.6 (4)        |
| C6   | 32.3 (6)        | 18.2 (6)        | 28.6 (6)        | 2.5 (5)         | 15.0 (5)        | 1.7 (5)         |
| C18  | 27.9 (6)        | 30.6 (7)        | 26.0 (6)        | 8.9 (5)         | 12.1 (5)        | 4.8 (5)         |
| C17  | 23.2 (6)        | 24.4 (6)        | 30.1 (6)        | 5.7 (5)         | 5.0 (5)         | -0.3 (5)        |
| C10  | 30.6 (6)        | 29.5 (6)        | 14.9 (5)        | 1.3 (5)         | 4.6 (4)         | -8.3 (5)        |
| C12  | 25.1 (6)        | 37.6 (8)        | 29.2 (6)        | 11.4 (6)        | -4.9 (5)        | -6.5 (5)        |
| C19  | 33.6 (6)        | 29.5 (7)        | 18.9 (5)        | 0.9 (5)         | 8.9 (5)         | 2.8 (5)         |
| C14  | 28.2 (6)        | 19.9 (6)        | 25.0 (6)        | 0.9 (5)         | -0.8 (5)        | -1.4 (5)        |
| C11  | 31.4 (6)        | 37.4 (7)        | 17.1 (5)        | 2.7 (5)         | 0.7 (5)         | -13.1 (6)       |
| C13  | 28.3 (6)        | 25.4 (6)        | 37.5 (7)        | 4.7 (5)         | -0.2 (5)        | 2.4 (5)         |

**Table S4 Bond Lengths for 4aa.**

| Atom | Atom | Length/Å    | Atom | Atom | Length/Å    |
|------|------|-------------|------|------|-------------|
| N1   | C8   | 1.3603 (15) | C16  | C17  | 1.3887 (17) |
| N1   | C1   | 1.3239 (15) | C7   | C6   | 1.3657 (18) |
| N2   | C2   | 1.3196 (15) | C5   | C6   | 1.4111 (18) |
| N2   | C3   | 1.3630 (15) | N3   | C10  | 1.3887 (18) |
| C8   | C3   | 1.4151 (16) | C20  | C19  | 1.3880 (17) |
| C8   | C7   | 1.4170 (16) | C9   | C10  | 1.4153 (16) |
| C2   | C1   | 1.4415 (15) | C9   | C14  | 1.3916 (18) |
| C2   | C15  | 1.4881 (16) | C18  | C17  | 1.3904 (18) |
| C1   | C9   | 1.4814 (16) | C18  | C19  | 1.3856 (19) |
| C3   | C4   | 1.4144 (16) | C10  | C11  | 1.4016 (18) |
| C15  | C16  | 1.3990 (16) | C12  | C11  | 1.381 (2)   |
| C15  | C20  | 1.3937 (16) | C12  | C13  | 1.390 (2)   |
| C4   | C5   | 1.3691 (17) | C14  | C13  | 1.3867 (17) |

**Table S5 Bond Angles for 4aa.**

| Atom | Atom | Atom | Angle/°     | Atom | Atom | Atom | Angle/°     |
|------|------|------|-------------|------|------|------|-------------|
| C1   | N1   | C8   | 118.10 (10) | C17  | C16  | C15  | 120.12 (11) |
| C2   | N2   | C3   | 117.66 (10) | C6   | C7   | C8   | 119.82 (11) |
| N1   | C8   | C3   | 120.67 (11) | C4   | C5   | C6   | 120.77 (12) |
| N1   | C8   | C7   | 119.75 (11) | C19  | C20  | C15  | 120.67 (11) |
| C3   | C8   | C7   | 119.57 (11) | C10  | C9   | C1   | 120.67 (11) |
| N2   | C2   | C1   | 121.46 (11) | C14  | C9   | C1   | 119.53 (10) |
| N2   | C2   | C15  | 115.51 (10) | C14  | C9   | C10  | 119.79 (11) |
| C1   | C2   | C15  | 123.00 (10) | C7   | C6   | C5   | 120.63 (11) |
| N1   | C1   | C2   | 120.71 (11) | C19  | C18  | C17  | 119.98 (11) |
| N1   | C1   | C9   | 116.89 (10) | C16  | C17  | C18  | 120.22 (11) |
| C2   | C1   | C9   | 122.38 (10) | N3   | C10  | C9   | 121.21 (11) |
| N2   | C3   | C8   | 120.85 (11) | N3   | C10  | C11  | 120.85 (11) |

**Table S5 Bond Angles for 4aa.**

| Atom | Atom | Atom | Angle/°     | Atom | Atom | Atom | Angle/°     |
|------|------|------|-------------|------|------|------|-------------|
| N2   | C3   | C4   | 119.74 (10) | C11  | C10  | C9   | 117.78 (12) |
| C4   | C3   | C8   | 119.33 (11) | C11  | C12  | C13  | 120.89 (12) |
| C16  | C15  | C2   | 121.61 (10) | C18  | C19  | C20  | 119.93 (12) |
| C20  | C15  | C2   | 119.18 (10) | C13  | C14  | C9   | 121.69 (12) |
| C20  | C15  | C16  | 119.06 (11) | C12  | C11  | C10  | 121.37 (12) |
| C5   | C4   | C3   | 119.85 (11) | C14  | C13  | C12  | 118.47 (13) |

**Table S6 Torsion Angles for 4aa.**

| A  | B  | C   | D   | Angle/°     | A   | B   | C   | D   | Angle/°     |
|----|----|-----|-----|-------------|-----|-----|-----|-----|-------------|
| N1 | C8 | C3  | N2  | 5.99 (16)   | C1  | C9  | C10 | C11 | 179.90 (11) |
| N1 | C8 | C3  | C4  | 177.08 (10) | C1  | C9  | C14 | C13 | 179.59 (11) |
| N1 | C8 | C7  | C6  | 177.05 (10) | C3  | N2  | C2  | C1  | -5.32 (15)  |
| N1 | C1 | C9  | C10 | 49.82 (15)  | C3  | N2  | C2  | C15 | 172.52 (9)  |
| N1 | C1 | C9  | C14 | 130.22 (12) | C3  | C8  | C7  | C6  | -1.64 (17)  |
| N2 | C2 | C1  | N1  | 7.91 (16)   | C3  | C4  | C5  | C6  | -0.62 (17)  |
| N2 | C2 | C1  | C9  | 170.24 (10) | C15 | C2  | C1  | N1  | 169.78 (10) |
| N2 | C2 | C15 | C16 | 136.15 (11) | C15 | C2  | C1  | C9  | 12.07 (16)  |
| N2 | C2 | C15 | C20 | 39.39 (15)  | C15 | C16 | C17 | C18 | 1.01 (18)   |
| N2 | C3 | C4  | C5  | 176.49 (10) | C15 | C20 | C19 | C18 | 1.47 (19)   |
| C8 | N1 | C1  | C2  | -3.11 (15)  | C4  | C5  | C6  | C7  | 0.60 (18)   |
| C8 | N1 | C1  | C9  | 175.13 (10) | C16 | C15 | C20 | C19 | -0.96 (18)  |
| C8 | C3 | C4  | C5  | -0.48 (16)  | C7  | C8  | C3  | N2  | 175.33 (10) |
| C8 | C7 | C6  | C5  | 0.55 (18)   | C7  | C8  | C3  | C4  | 1.60 (16)   |
| C2 | N2 | C3  | C8  | -1.33 (15)  | N3  | C10 | C11 | C12 | 176.25 (12) |

**Table S6 Torsion Angles for 4aa.**

| A  | B   | C   | D   | Angle/°                    | A   | B   | C   | D   | Angle/°                    |
|----|-----|-----|-----|----------------------------|-----|-----|-----|-----|----------------------------|
| C2 | N2  | C3  | C4  | <sup>-</sup><br>178.25(10) | C20 | C15 | C16 | C17 | -0.28(17)                  |
| C2 | C1  | C9  | C10 | <sup>-</sup><br>131.97(12) | C9  | C10 | C11 | C12 | 0.75(18)                   |
| C2 | C1  | C9  | C14 | 47.99(16)                  | C9  | C14 | C13 | C12 | 0.3(2)                     |
| C2 | C15 | C16 | C17 | 175.26(10)                 | C17 | C18 | C19 | C20 | -0.73(19)                  |
| C2 | C15 | C20 | C19 | <sup>-</sup><br>176.61(11) | C10 | C9  | C14 | C13 | -0.45(19)                  |
| C1 | N1  | C8  | C3  | -3.47(16)                  | C19 | C18 | C17 | C16 | -0.51(19)                  |
| C1 | N1  | C8  | C7  | 177.85(10)                 | C14 | C9  | C10 | N3  | <sup>-</sup><br>175.55(12) |
| C1 | C2  | C15 | C16 | 41.66(16)                  | C14 | C9  | C10 | C11 | -0.06(17)                  |
| C1 | C2  | C15 | C20 | <sup>-</sup><br>142.80(11) | C11 | C12 | C13 | C14 | 0.4(2)                     |
| C1 | C9  | C10 | N3  | 4.41(18)                   | C13 | C12 | C11 | C10 | -0.9(2)                    |

**Table S7 Hydrogen Atom Coordinates (Å×10<sup>4</sup>) and Isotropic Displacement Parameters (Å<sup>2</sup>×10<sup>3</sup>) for 4aa.**

| Atom | x       | y        | z       | U(eq) |
|------|---------|----------|---------|-------|
| H4   | 5924.88 | 7546.56  | 6094.91 | 25    |
| H16  | 1617.07 | 5113.29  | 4941.22 | 27    |
| H7   | 5050.21 | 7305.33  | 3176.17 | 28    |
| H5   | 7063.39 | 7466.79  | 5317.77 | 28    |
| H20  | 3145.75 | 8899.42  | 6637.73 | 26    |
| H6   | 6626.53 | 7323.89  | 3860.23 | 30    |
| H18  | 865.03  | 6103.06  | 7120.73 | 33    |
| H17  | 622.61  | 4474.96  | 5840.11 | 31    |
| H12  | -606.95 | 8603.68  | 2687.41 | 39    |
| H19  | 2116.66 | 8342.12  | 7511.55 | 32    |
| H14  | 1611.04 | 10044.52 | 4545.63 | 31    |

**Table S7 Hydrogen Atom Coordinates ( $\text{\AA} \times 10^4$ ) and Isotropic Displacement Parameters ( $\text{\AA}^2 \times 10^3$ ) for 4aa.**

| Atom | <i>x</i>  | <i>y</i>  | <i>z</i>  | U(eq)  |
|------|-----------|-----------|-----------|--------|
| H11  | 288.84    | 6176.47   | 2236.25   | 35     |
| H13  | 39.2      | 10553.56  | 3853.23   | 38     |
| H3A  | 2713 (14) | 5310 (30) | 2969 (12) | 51 (5) |
| H3B  | 1762 (12) | 4430 (30) | 2345 (11) | 44 (5) |

**Experimental**

Single crystals of  $\text{C}_{20}\text{H}_{15}\text{N}_3$  **4aa** were obtained by slow evaporation of saturated solution in EtOAc. A suitable crystal was selected and mounted on the glass stick by acrylic glue on a SuperNova, Dual, Cu at home/near, **AtlasS2 diffractometer**. The crystal was kept at 100.00(10) K during data collection. Using Olex2 [S1], the structure was solved with the olex2.solve [S2] structure solution program using Charge Flipping and refined with the SHELXL [S3] refinement package using Least Squares minimisation.

**Crystal structure determination of 4aa**

**Crystal Data** for  $\text{C}_{20}\text{H}_{15}\text{N}_3$  ( $M=297.35$  g/mol): monoclinic, space group  $\text{P2}_1/\text{n}$  (no. 14),  $a = 14.4029(4)$  Å,  $b = 6.66847(16)$  Å,  $c = 16.3992(4)$  Å,  $\beta = 103.136(2)^\circ$ ,  $V = 1533.86(7)$  Å<sup>3</sup>,  $Z = 4$ ,  $T = 100.00(10)$  K,  $\mu(\text{Cu K}\alpha) = 0.607$  mm<sup>-1</sup>,  $D_{\text{calc}} = 1.288$  g/cm<sup>3</sup>, 16681 reflections measured ( $7.382^\circ \leq 2\theta \leq 152.812^\circ$ ), 3222 unique ( $R_{\text{int}} = 0.0303$ ,  $R_{\text{sigma}} = 0.0184$ ) which were used in all calculations. The final  $R_1$  was 0.0441 ( $I > 2\sigma(I)$ ) and  $wR_2$  was 0.1199 (all data).

**Refinement model description**

Number of restraints - 0, number of constraints - unknown.

Details:

1. Fixed Uiso

At 1.2 times of:

All C(H) groups

2.a Aromatic/amide H refined with riding coordinates:

C4(H4), C16(H16), C7(H7), C5(H5), C20(H20), C6(H6), C18(H18), C17(H17),  
C12(H12), C19(H19), C14(H14), C11(H11), C13(H13)

This report has been created with Olex2, compiled on 2020.11.12 svn.r5f609507 for OlexSys. Please [let us know](#) if there are any errors or if you would like to have additional features.



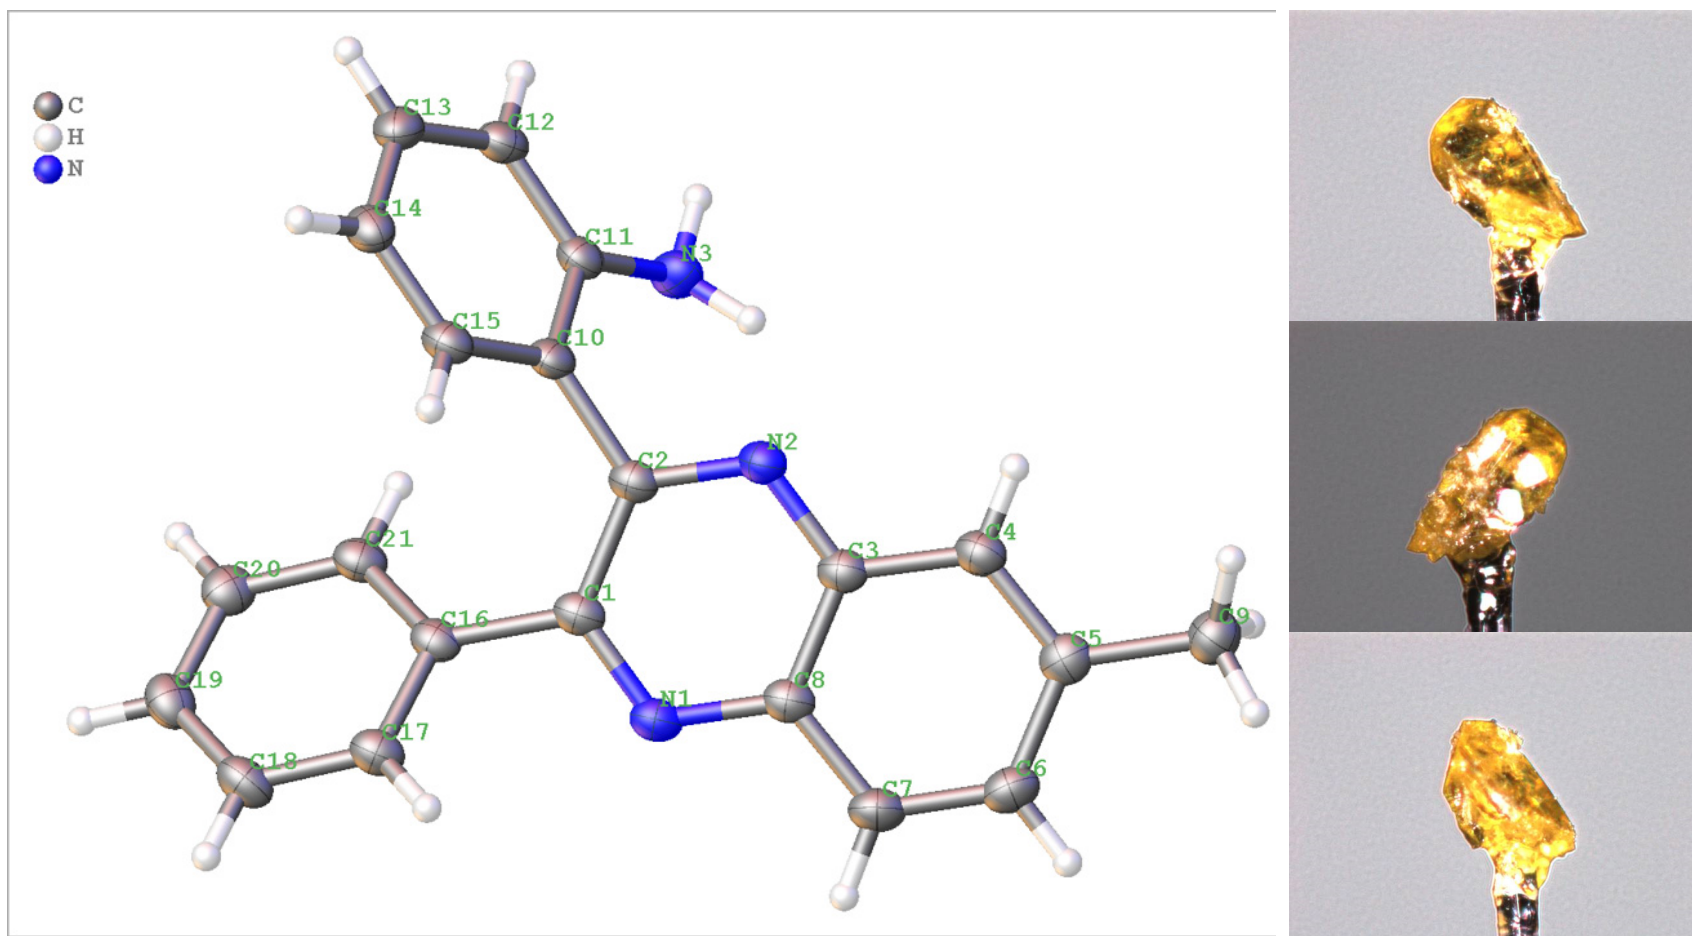

**Figure S39.** ORTEP drawing of the crystal structure showing 50% probability thermal ellipsoids (left, CCDC 2195382) and microphotography of the single crystal of compound **4'ba** used for X-Ray diffraction analysis at the bottom.

**Table S8 Crystal data and structure refinement for ANNA\_KUR432\_2.**

|                                                |                                                               |
|------------------------------------------------|---------------------------------------------------------------|
| Identification code                            | ANNA_KUR432_2                                                 |
| Empirical formula                              | C <sub>21</sub> H <sub>17</sub> N <sub>3</sub>                |
| Formula weight                                 | 311.38                                                        |
| Temperature/K                                  | 100.00(10)                                                    |
| Crystal system                                 | monoclinic                                                    |
| Space group                                    | P2 <sub>1</sub> /n                                            |
| a/Å                                            | 11.67181(16)                                                  |
| b/Å                                            | 7.46450(9)                                                    |
| c/Å                                            | 18.9827(3)                                                    |
| $\alpha/^\circ$                                | 90                                                            |
| $\beta/^\circ$                                 | 106.0997(14)                                                  |
| $\gamma/^\circ$                                | 90                                                            |
| Volume/Å <sup>3</sup>                          | 1588.99(4)                                                    |
| Z                                              | 4                                                             |
| $\rho_{\text{calc}}/\text{cm}^{-3}$            | 1.302                                                         |
| $\mu/\text{mm}^{-1}$                           | 0.609                                                         |
| F(000)                                         | 656.0                                                         |
| Crystal size/mm <sup>3</sup>                   | 0.541 × 0.328 × 0.253                                         |
| Radiation                                      | Cu K $\alpha$ ( $\lambda$ = 1.54184)                          |
| 2 $\Theta$ range for data collection/ $^\circ$ | 8.028 to 152.66                                               |
| Index ranges                                   | -14 ≤ h ≤ 14, -9 ≤ k ≤ 9, -23 ≤ l ≤ 23                        |
| Reflections collected                          | 16948                                                         |
| Independent reflections                        | 3324 [R <sub>int</sub> = 0.0207, R <sub>sigma</sub> = 0.0133] |
| Data/restraints/parameters                     | 3324/0/227                                                    |
| Goodness-of-fit on F <sup>2</sup>              | 1.045                                                         |
| Final R indexes [I ≥ 2 $\sigma$ (I)]           | R <sub>1</sub> = 0.0379, wR <sub>2</sub> = 0.0997             |
| Final R indexes [all data]                     | R <sub>1</sub> = 0.0393, wR <sub>2</sub> = 0.1008             |
| Largest diff. peak/hole / e Å <sup>-3</sup>    | 0.39/-0.25                                                    |

**Table S9 Fractional Atomic Coordinates ( $\times 10^4$ ) and Equivalent Isotropic Displacement Parameters ( $\text{\AA}^2 \times 10^3$ ) for 4'ba.  $U_{\text{eq}}$  is defined as 1/3 of the trace of the orthogonalised  $U_{ij}$  tensor.**

| Atom | <i>x</i>    | <i>y</i>    | <i>z</i>   | <i>U</i> (eq) |
|------|-------------|-------------|------------|---------------|
| N2   | 3613.8 (8)  | 2761.0 (13) | 3659.2 (5) | 23.9 (2)      |
| N1   | 5911.6 (8)  | 2317.9 (13) | 4613.0 (5) | 24.0 (2)      |
| N3   | 3395.8 (9)  | 5476.5 (14) | 2477.9 (6) | 29.7 (2)      |
| C4   | 2821.2 (10) | 3086.1 (15) | 4685.4 (6) | 25.7 (2)      |
| C2   | 4546.2 (10) | 2539.4 (14) | 3402.3 (6) | 22.5 (2)      |
| C11  | 3662.5 (9)  | 3906.4 (16) | 2158.6 (6) | 23.9 (2)      |
| C17  | 7761.3 (10) | 1100.1 (15) | 4027.0 (6) | 26.3 (2)      |
| C18  | 8800.1 (10) | 961.7 (16)  | 3809.7 (7) | 30.0 (3)      |
| C10  | 4276.8 (9)  | 2478.4 (15) | 2589.9 (6) | 22.9 (2)      |
| C8   | 4955.9 (10) | 2564.3 (14) | 4879.8 (6) | 23.5 (2)      |
| C15  | 4613.0 (10) | 997.5 (16)  | 2249.3 (6) | 26.1 (2)      |
| C14  | 4372.4 (10) | 897.4 (17)  | 1493.1 (6) | 28.8 (3)      |
| C16  | 6815.6 (10) | 2165.0 (15) | 3630.6 (6) | 22.9 (2)      |
| C1   | 5732.9 (10) | 2336.4 (14) | 3893.5 (6) | 22.7 (2)      |
| C12  | 3406.0 (10) | 3768.7 (17) | 1395.0 (6) | 27.0 (3)      |
| C3   | 3797.8 (10) | 2805.5 (15) | 4399.7 (6) | 23.2 (2)      |
| C5   | 2965.9 (11) | 3181.3 (15) | 5425.9 (6) | 26.3 (2)      |
| C21  | 6948.7 (10) | 3110.9 (16) | 3024.6 (6) | 25.7 (2)      |
| C20  | 7990.2 (10) | 2984.7 (17) | 2812.0 (6) | 28.6 (3)      |
| C9   | 1906.6 (11) | 3553.0 (18) | 5717.4 (7) | 31.5 (3)      |
| C7   | 5097.0 (11) | 2636.4 (16) | 5644.7 (6) | 28.1 (3)      |
| C19  | 8918.1 (10) | 1897.6 (17) | 3203.0 (7) | 29.7 (3)      |
| C6   | 4134.1 (11) | 2945.7 (16) | 5906.5 (6) | 28.5 (3)      |
| C13  | 3755.3 (10) | 2288.6 (18) | 1067.2 (6) | 29.1 (3)      |

**Table S10 Anisotropic Displacement Parameters ( $\text{\AA}^2 \times 10^3$ ) for 4'ba. The Anisotropic displacement factor exponent takes the form:  $-2\pi^2[h^2a^{*2}U_{11}+2hka^*b^*U_{12}+\dots]$ .**

| Atom | U <sub>11</sub> | U <sub>22</sub> | U <sub>33</sub> | U <sub>23</sub> | U <sub>13</sub> | U <sub>12</sub> |
|------|-----------------|-----------------|-----------------|-----------------|-----------------|-----------------|
| N2   | 22.3 (4)        | 23.6 (5)        | 23.5 (5)        | -1.2 (4)        | 2.6 (4)         | 1.0 (4)         |
| N1   | 23.2 (5)        | 20.7 (5)        | 25.1 (5)        | 1.2 (4)         | 1.6 (4)         | -0.8 (4)        |
| N3   | 31.3 (5)        | 28.5 (5)        | 27.4 (5)        | 2.0 (4)         | 4.8 (4)         | 8.3 (4)         |
| C4   | 24.5 (5)        | 22.9 (5)        | 27.2 (6)        | -0.9 (4)        | 3.0 (4)         | 1.0 (4)         |
| C2   | 21.8 (5)        | 18.9 (5)        | 24.4 (5)        | -0.3 (4)        | 2.4 (4)         | 0.4 (4)         |
| C11  | 17.2 (5)        | 26.1 (6)        | 26.6 (5)        | -0.9 (4)        | 3.0 (4)         | -0.4 (4)        |
| C17  | 24.0 (5)        | 21.9 (5)        | 30.2 (6)        | 1.6 (4)         | 2.7 (4)         | -0.8 (4)        |
| C18  | 22.4 (5)        | 24.6 (6)        | 40.0 (7)        | 0.2 (5)         | 3.4 (5)         | 1.3 (4)         |
| C10  | 16.8 (5)        | 25.9 (6)        | 23.6 (5)        | -0.8 (4)        | 1.6 (4)         | -1.3 (4)        |
| C8   | 24.2 (5)        | 18.3 (5)        | 25.3 (6)        | 0.4 (4)         | 2.4 (4)         | -1.3 (4)        |
| C15  | 20.6 (5)        | 26.2 (6)        | 28.1 (6)        | -1.1 (4)        | 0.9 (4)         | 0.9 (4)         |
| C14  | 24.6 (5)        | 31.0 (6)        | 28.6 (6)        | -7.5 (5)        | 3.6 (4)         | 0.3 (5)         |
| C16  | 20.4 (5)        | 19.3 (5)        | 26.1 (5)        | -2.5 (4)        | 1.6 (4)         | -2.6 (4)        |
| C1   | 22.2 (5)        | 16.7 (5)        | 26.2 (5)        | 0.6 (4)         | 1.9 (4)         | -0.9 (4)        |
| C12  | 20.7 (5)        | 30.7 (6)        | 26.5 (6)        | 2.9 (5)         | 1.2 (4)         | 0.6 (4)         |
| C3   | 24.8 (5)        | 18.9 (5)        | 23.6 (5)        | -1.4 (4)        | 2.7 (4)         | -0.5 (4)        |
| C5   | 31.8 (6)        | 18.0 (5)        | 28.6 (6)        | -0.6 (4)        | 7.8 (5)         | -1.0 (4)        |
| C21  | 22.2 (5)        | 23.9 (5)        | 27.6 (6)        | -0.2 (4)        | 1.2 (4)         | -2.5 (4)        |
| C20  | 28.0 (6)        | 27.2 (6)        | 29.4 (6)        | -2.1 (5)        | 6.0 (5)         | -6.7 (5)        |
| C9   | 35.1 (6)        | 29.2 (6)        | 30.9 (6)        | -1.3 (5)        | 10.4 (5)        | -0.1 (5)        |
| C7   | 28.5 (6)        | 26.8 (6)        | 24.9 (6)        | 2.3 (4)         | 0.5 (4)         | -0.9 (5)        |
| C19  | 23.4 (5)        | 27.4 (6)        | 38.5 (6)        | -6.2 (5)        | 8.8 (5)         | -4.5 (5)        |
| C6   | 35.3 (6)        | 25.5 (6)        | 22.7 (5)        | 1.0 (4)         | 4.6 (5)         | -2.5 (5)        |
| C13  | 24.8 (5)        | 37.5 (7)        | 22.6 (5)        | -3.5 (5)        | 2.6 (4)         | -2.2 (5)        |

**Table S11 Bond Lengths for 4'ba.**

| Atom | Atom | Length/Å    | Atom | Atom | Length/Å    |
|------|------|-------------|------|------|-------------|
| N2   | C2   | 1.3206 (14) | C10  | C15  | 1.3909 (16) |
| N2   | C3   | 1.3622 (14) | C8   | C3   | 1.4166 (15) |
| N1   | C8   | 1.3593 (15) | C8   | C7   | 1.4162 (16) |
| N1   | C1   | 1.3233 (14) | C15  | C14  | 1.3861 (16) |
| N3   | C11  | 1.3938 (15) | C14  | C13  | 1.3885 (18) |
| C4   | C3   | 1.4073 (16) | C16  | C1   | 1.4873 (15) |
| C4   | C5   | 1.3703 (16) | C16  | C21  | 1.3947 (16) |
| C2   | C10  | 1.4867 (15) | C12  | C13  | 1.3838 (17) |
| C2   | C1   | 1.4473 (15) | C5   | C9   | 1.5137 (16) |
| C11  | C10  | 1.4124 (16) | C5   | C6   | 1.4256 (17) |
| C11  | C12  | 1.4002 (16) | C21  | C20  | 1.3862 (16) |
| C17  | C18  | 1.3886 (16) | C20  | C19  | 1.3916 (18) |
| C17  | C16  | 1.3985 (16) | C7   | C6   | 1.3685 (17) |
| C18  | C19  | 1.3861 (18) |      |      |             |

**Table S12 Bond Angles for 4'ba.**

| Atom | Atom | Atom | Angle/°     | Atom | Atom | Atom | Angle/°     |
|------|------|------|-------------|------|------|------|-------------|
| C2   | N2   | C3   | 118.29 (9)  | C17  | C16  | C1   | 119.05 (10) |
| C1   | N1   | C8   | 118.19 (9)  | C21  | C16  | C17  | 118.66 (10) |
| C5   | C4   | C3   | 121.36 (10) | C21  | C16  | C1   | 122.18 (10) |
| N2   | C2   | C10  | 115.34 (9)  | N1   | C1   | C2   | 120.98 (10) |
| N2   | C2   | C1   | 120.97 (10) | N1   | C1   | C16  | 116.11 (9)  |
| C1   | C2   | C10  | 123.67 (10) | C2   | C1   | C16  | 122.90 (10) |
| N3   | C11  | C10  | 121.42 (10) | C13  | C12  | C11  | 121.27 (11) |
| N3   | C11  | C12  | 120.16 (10) | N2   | C3   | C4   | 119.25 (10) |
| C12  | C11  | C10  | 118.23 (10) | N2   | C3   | C8   | 120.67 (10) |
| C18  | C17  | C16  | 120.42 (11) | C4   | C3   | C8   | 120.09 (10) |
| C19  | C18  | C17  | 120.36 (11) | C4   | C5   | C9   | 120.24 (10) |

**Table S12 Bond Angles for 4'ba.**

| Atom | Atom | Atom | Angle/°     | Atom | Atom | Atom | Angle/°     |
|------|------|------|-------------|------|------|------|-------------|
| C11  | C10  | C2   | 120.36 (10) | C4   | C5   | C6   | 118.29 (11) |
| C15  | C10  | C2   | 120.05 (10) | C6   | C5   | C9   | 121.46 (10) |
| C15  | C10  | C11  | 119.58 (10) | C20  | C21  | C16  | 120.87 (11) |
| N1   | C8   | C3   | 120.84 (10) | C21  | C20  | C19  | 120.00 (11) |
| N1   | C8   | C7   | 120.86 (10) | C6   | C7   | C8   | 120.33 (11) |
| C7   | C8   | C3   | 118.27 (11) | C18  | C19  | C20  | 119.67 (11) |
| C14  | C15  | C10  | 121.47 (11) | C7   | C6   | C5   | 121.63 (11) |
| C15  | C14  | C13  | 119.08 (11) | C12  | C13  | C14  | 120.35 (11) |

**Table S13 Torsion Angles for 4'ba.**

| A  | B   | C   | D   | Angle/°          | A   | B   | C   | D   | Angle/°          |
|----|-----|-----|-----|------------------|-----|-----|-----|-----|------------------|
| N2 | C2  | C10 | C11 | 56.12 (14)       | C8  | N1  | C1  | C2  | -2.50 (15)       |
| N2 | C2  | C10 | C15 | -<br>122.87 (11) | C8  | N1  | C1  | C16 | 176.64 (9)       |
| N2 | C2  | C1  | N1  | 1.88 (16)        | C8  | C7  | C6  | C5  | 0.79 (18)        |
| N2 | C2  | C1  | C16 | -<br>177.19 (10) | C15 | C14 | C13 | C12 | 1.20 (18)        |
| N1 | C8  | C3  | N2  | 1.28 (16)        | C16 | C17 | C18 | C19 | 0.90 (18)        |
| N1 | C8  | C3  | C4  | -<br>179.03 (10) | C16 | C21 | C20 | C19 | 0.28 (17)        |
| N1 | C8  | C7  | C6  | 177.78 (11)      | C1  | N1  | C8  | C3  | 0.99 (15)        |
| N3 | C11 | C10 | C2  | 6.35 (16)        | C1  | N1  | C8  | C7  | -<br>177.23 (10) |
| N3 | C11 | C10 | C15 | -<br>174.66 (10) | C1  | C2  | C10 | C11 | -<br>125.16 (12) |
| N3 | C11 | C12 | C13 | 174.29 (11)      | C1  | C2  | C10 | C15 | 55.86 (15)       |
| C4 | C5  | C6  | C7  | 0.18 (17)        | C1  | C16 | C21 | C20 | 177.11 (10)      |
| C2 | N2  | C3  | C4  | 178.39 (10)      | C12 | C11 | C10 | C2  | -<br>178.59 (10) |

**Table S13 Torsion Angles for 4'ba.**

| A   | B   | C   | D   | Angle/°             | A   | B   | C   | D   | Angle/°             |
|-----|-----|-----|-----|---------------------|-----|-----|-----|-----|---------------------|
| C2  | N2  | C3  | C8  | -1.91 (16)          | C12 | C11 | C10 | C15 | 0.40 (16)           |
| C2  | C10 | C15 | C14 | 179.84 (10)         | C3  | N2  | C2  | C10 | 179.17 (9)          |
| C11 | C10 | C15 | C14 | 0.84 (17)           | C3  | N2  | C2  | C1  | 0.41 (15)           |
| C11 | C12 | C13 | C14 | 0.03 (18)           | C3  | C4  | C5  | C9  | 177.72 (11)         |
| C17 | C18 | C19 | C20 | 0.19 (18)           | C3  | C4  | C5  | C6  | -1.47 (17)          |
| C17 | C16 | C1  | N1  | 34.11 (14)          | C3  | C8  | C7  | C6  | -0.49 (17)          |
| C17 | C16 | C1  | C2  | $\bar{146.77}$ (11) | C5  | C4  | C3  | N2  | $\bar{178.52}$ (10) |
| C17 | C16 | C21 | C20 | 0.79 (17)           | C5  | C4  | C3  | C8  | 1.78 (17)           |
| C18 | C17 | C16 | C1  | $\bar{177.82}$ (10) | C21 | C16 | C1  | N1  | $\bar{142.20}$ (11) |
| C18 | C17 | C16 | C21 | -1.37 (17)          | C21 | C16 | C1  | C2  | 36.92 (16)          |
| C10 | C2  | C1  | N1  | $\bar{176.78}$ (10) | C21 | C20 | C19 | C18 | -0.77 (18)          |
| C10 | C2  | C1  | C16 | 4.15 (16)           | C9  | C5  | C6  | C7  | $\bar{178.99}$ (11) |
| C10 | C11 | C12 | C13 | -0.83 (16)          | C7  | C8  | C3  | N2  | 179.54 (10)         |
| C10 | C15 | C14 | C13 | -1.65 (17)          | C7  | C8  | C3  | C4  | -0.76 (16)          |

**Table S14 Hydrogen Atom Coordinates ( $\text{\AA} \times 10^4$ ) and Isotropic Displacement Parameters ( $\text{\AA}^2 \times 10^3$ ) for 4'ba.**

| Atom | x       | y       | z       | U(eq) |
|------|---------|---------|---------|-------|
| H4   | 2061.8  | 3209.49 | 4365.05 | 31    |
| H17  | 7694.08 | 480.75  | 4438.75 | 32    |
| H18  | 9420.01 | 237.09  | 4072.62 | 36    |
| H15  | 5008.04 | 53.61   | 2535.23 | 31    |
| H14  | 4620.89 | -88.04  | 1274.06 | 35    |
| H12  | 2992.86 | 4689.69 | 1102.55 | 32    |
| H21  | 6330.68 | 3835.73 | 2759.64 | 31    |
| H20  | 8068.83 | 3626.63 | 2408.06 | 34    |

**Table S14 Hydrogen Atom Coordinates ( $\text{\AA} \times 10^4$ ) and Isotropic Displacement Parameters ( $\text{\AA}^2 \times 10^3$ ) for 4'ba.**

| Atom | x         | y         | z        | U(eq)  |
|------|-----------|-----------|----------|--------|
| H9A  | 1789.73   | 4823.22   | 5736.02  | 47     |
| H9B  | 2052.41   | 3059.14   | 6201.21  | 47     |
| H9C  | 1206      | 3012.24   | 5399.88  | 47     |
| H7   | 5847.65   | 2472.86   | 5970.68  | 34     |
| H19  | 9613.99   | 1799.41   | 3057.91  | 36     |
| H6   | 4244.65   | 3003.6    | 6410.32  | 34     |
| H13  | 3575.87   | 2225.39   | 558.91   | 35     |
| H3A  | 2881 (14) | 6210 (20) | 2158 (9) | 40 (4) |
| H3B  | 3174 (15) | 5300 (20) | 2903 (9) | 47 (5) |

### Experimental

Single crystals of  $\text{C}_{21}\text{H}_{17}\text{N}_3$  4'ba were obtained by slow evaporation of EtOAc solution. A suitable crystal was selected and mounted on the glass stick by acrylic glue on a **SuperNova, Dual, Cu at home/near, AtlasS2** diffractometer. The crystal was kept at 100.00(10) K during data collection. Using Olex2 [S1], the structure was solved with the olex2.solve [S2] structure solution program using Charge Flipping and refined with the SHELXL [S3] refinement package using Least Squares minimisation.

### Crystal structure determination of 4'ba

**Crystal Data** for  $\text{C}_{21}\text{H}_{17}\text{N}_3$  ( $M = 311.38$  g/mol): monoclinic, space group  $P2_1/n$  (no. 14),  $a = 11.67181(16)$   $\text{\AA}$ ,  $b = 7.46450(9)$   $\text{\AA}$ ,  $c = 18.9827(3)$   $\text{\AA}$ ,  $\beta = 106.0997(14)^\circ$ ,  $V = 1588.99(4)$   $\text{\AA}^3$ ,  $Z = 4$ ,  $T = 100.00(10)$  K,  $\mu(\text{Cu K}\alpha) = 0.609$   $\text{mm}^{-1}$ ,  $D_{\text{calc}} = 1.302$   $\text{g/cm}^3$ , 16948 reflections measured ( $8.028^\circ \leq 2\theta \leq 152.66^\circ$ ), 3324 unique ( $R_{\text{int}} = 0.0207$ ,  $R_{\text{sigma}} = 0.0133$ ) which were used in all calculations. The final  $R_1$  was 0.0379 ( $I > 2\sigma(I)$ ) and  $wR_2$  was 0.1008 (all data).

### Refinement model description

Number of restraints - 0, number of constraints - unknown.

Details:

1. Fixed Uiso

At 1.2 times of:

All C(H) groups

At 1.5 times of:

All C(H,H,H) groups

2.a Aromatic/amide H refined with riding coordinates:

C4(H4), C17(H17), C18(H18), C15(H15), C14(H14), C12(H12), C21(H21), C20(H20),

C7(H7), C19(H19), C6(H6), C13(H13)

2.b Idealised Me refined as rotating group:

C9(H9A,H9B,H9C)

This report has been created with Olex2, compiled on 2020.11.12 svn.r5f609507 for OlexSys. Please [let us know](#) if there are any errors or if you would like to have additional features.



## References

- S1. Dolomanov, O.V., Bourhis, L.J., Gildea, R.J, Howard, J.A.K. & Puschmann, H. (2009), *J. Appl. Cryst.* 42, 339-341.
- S2. Sheldrick, G.M. (2008). *Acta Cryst.* A64, 112-122.
- S3. Sheldrick, G.M. (2015). *Acta Cryst.* C71, 3-8.
